# Supplementary material for: Daily rhythmicity in coastal microbial mats
Source: PubMed Central journal article supplement (PMC5953948; doi:10.1038/s41522-018-0054-5), 2018-05-15
Supplement: 41522_2018_54_MOESM2_ESM.pdf [file 41522_2018_54_MOESM2_ESM.pdf]

**Tab. S1. Count and taxonomical annotation of rhythmic, protein-coding CGTs (F + R) distributed into their maximum expression phase.**

| Function                               | 00:00-04:00 | 04:00-08:00 | 08:00-12:00 | 12:00-16:00 | 16:00-20:00 | 20:00-00:00 |
|----------------------------------------|-------------|-------------|-------------|-------------|-------------|-------------|
| arfA/Rf2                               | 2           | 1           | 0           | 0           | 0           | 0           |
| atpB                                   | 4           | 0           | 0           | 0           | 0           | 0           |
| Chloroplast                            | 13          | 0           | 0           | 0           | 0           | 1           |
| COI                                    | 3           | 0           | 0           | 0           | 0           | 1           |
| Cold shock protein                     | 0           | 0           | 0           | 0           | 0           | 1           |
| cox2                                   | 0           | 0           | 0           | 0           | 0           | 1           |
| CRISPR                                 | 0           | 0           | 0           | 1           | 0           | 0           |
| Cytochrome b                           | 2           | 0           | 0           | 0           | 0           | 0           |
| DNA starvation protein                 | 0           | 0           | 0           | 0           | 2           | 0           |
| Ferritin                               | 0           | 0           | 0           | 1           | 0           | 0           |
| High light inducible protein           | 0           | 0           | 0           | 1           | 0           | 0           |
| Hypothetical protein                   | 23          | 5           | 14          | 38          | 1           | 9           |
| ITS                                    | 1           | 0           | 0           | 0           | 0           | 3           |
| Lipoprotein                            | 1           | 0           | 0           | 0           | 0           | 0           |
| LSU                                    | 0           | 0           | 2           | 2           | 0           | 0           |
| Mitochondrial protein                  | 1           | 0           | 1           | 0           | 0           | 2           |
| ncRNA                                  | 1           | 0           | 0           | 0           | 0           | 0           |
| Nitrogen fixation related gene cluster | 3           | 0           | 0           | 0           | 0           | 0           |
| Photosystem I                          | 11          | 2           | 0           | 2           | 0           | 8           |
| Photosystem II                         | 73          | 3           | 0           | 1           | 0           | 11          |
| Phycocyanin                            | 0           | 0           | 0           | 0           | 1           | 0           |
| Plasmid                                | 0           | 0           | 1           | 0           | 0           | 0           |
| mpB                                    | 0           | 0           | 0           | 1           | 1           | 0           |
| RuBisCO                                | 106         | 0           | 0           | 0           | 0           | 7           |
| tmRNA                                  | 4           | 0           | 5           | 4           | 1           | 3           |
| Transposase                            | 0           | 0           | 0           | 2           | 0           | 4           |
| tRNA                                   | 0           | 0           | 0           | 1           | 0           | 0           |

**Tab. S2. Sequences of RT-qPCR primers and TaqMan probes for *L. aestuarii* PCC8106 (CCY9616). Validation of housekeeping genes (\*) (BestKeeper) is given by regression coefficient (r) and p-value.**

| Gene         | ID    | sequence (5' --> 3')               | length (nt) | primer position (nt)     | product size (nt) | r / p-value (BestKeeper) |
|--------------|-------|------------------------------------|-------------|--------------------------|-------------------|--------------------------|
| <i>kaiA</i>  | 220F  | AAGGGCTTTATCTCCGG<br>AAAAAT        | 22          | 2,645,470-<br>2,645,492  | 119               |                          |
|              | 338R  | GCAGTTCTAAAAATTTTC<br>TGCGGA       | 24          | 2,645,588-<br>2,645,565  |                   |                          |
|              | 290P  | TCTTGGCGTTCGGCTGG<br>AGGCA         | 22          | 2,645,540-<br>2,645,561  |                   |                          |
| <i>kaiB</i>  | 116F  | TTAGAAAGGGTCGGTGT<br>GGC           | 20          | 2,644,858-<br>2,644,877  | 145               |                          |
|              | 260R  | CGAACTCTGTACGAGCG<br>CTA           | 20          | 2,645,002-<br>2,644,983  |                   |                          |
|              | 152P  | TCGGCGAGTTGAGGATT<br>TTTCAGAACGTCA | 30          | 2,644,894-<br>2,644,932  |                   |                          |
| <i>kaiC</i>  | 1059F | GAGCCACCAAGCGAAA<br>GATT           | 20          | 2,644,068 -<br>2,644,087 | 140               |                          |
|              | 1128R | GTGACTGCGGTTTTCCA<br>ACA           | 20          | 2,644,137-<br>2,644,118  |                   |                          |
|              | 1081P | CCGTCTAACACGCCTG<br>CGGC           | 21          | 2,644,090-<br>2,644,110  |                   |                          |
| <i>cikA</i>  | 2300F | TGATCAATCAAATCCCA<br>TGACCA        | 23          | 6,825,346-<br>6,825,368  | 101               |                          |
|              | 2400R | CAAAAACAAGCCGAAGA<br>AGAACT        | 23          | 6,825,446-<br>6,825,424  |                   |                          |
|              | 2323P | TCCCCGACTTTGGCGA<br>TGCGT          | 22          | 6,825,369-<br>6,825,390  |                   |                          |
| <i>nifH</i>  | 127F  | GTTGTCAATCGGTGTCTG<br>GGA          | 20          | 3,127,672-<br>3,127,691  | 147               |                          |
|              | 273R  | CGCTCCAAGCAGGTACA<br>AGA           | 20          | 3,127,799-<br>3,127,818  |                   |                          |
|              | 187P  | GCGATATTCTGCCGATT<br>GTTTCGTGGTCTG | 28          | 3,127,732-<br>3,127,759  |                   |                          |
| <i>psbA</i>  | 50F   | TCTGCAACTGGGTAACG<br>TCC           | 20          | 4,484,474-<br>4,484,493  | 112               |                          |
|              | 161R  | GCGACGAAGGCTACGA<br>TGTA           | 20          | 4,484,566-<br>4,484,585  |                   |                          |
|              | 86P   | ACATCGGCTGGTTCGGC<br>GTGTTG        | 23          | 4,484,501-<br>4,484,532  |                   |                          |
| <i>rnpA*</i> | 199F  | CACAGCGCGTTTGCTAA<br>CTT           | 20          | 1,637,449-<br>1,637,468  | 131               | 0.843/0.001              |
|              | 323R  | CTCACTTAACGCTGAGG<br>GCA           | 20          | 1,637,579-<br>1,637,560  |                   |                          |
|              | 237P  | CGATCCGGGTCGCTCG<br>CTGC           | 20          | 1,637,487-<br>1,637,506  |                   |                          |
| <i>ppC*</i>  | 2882F | AGCGTTTACGTCAGCAT<br>GGA           | 20          | 5,861,452-<br>5,861,471  | 118               | 0.914/0.001              |
|              | 2999R | CGCATTCCAGCAGCAAT<br>ACC           | 20          | 5,861,550-<br>5,861,569  |                   |                          |
|              | 2905P | GCCAGTGCGCCCGGAG<br>TGATT          | 22          | 5,861,475-<br>5,861,496  |                   |                          |

\* Housekeeping gene

**Table S3. MetaCycle analysis output of *B<sup>-C</sup>*, *P*, *Bs*, *C*, *Eu*, *L. aestuarii* PCC8106 (CCY9616), *C. chthonoplastes* PCC7420 (CCY9604), *R. denitrificans* OCh114, *A. vinosum* DSM180 and *C. litoralis* KT71.**

| Dataset         | level1          | level2             | level3            | function        | meta2d_pvalue | meta2d_BH.Q | meta2d_period | meta2d_phase | meta2d_Base | meta2d_AMP  | meta2d_rAMP |
|-----------------|-----------------|--------------------|-------------------|-----------------|---------------|-------------|---------------|--------------|-------------|-------------|-------------|
| B <sup>-C</sup> | Stress Respo    | Cold shock         | Cold_shock,_Cs    | Cold shock pr   | 0,004324653   | 0,301583391 | 27,30735931   | 26,34157665  | 299,6331401 | 161,4049213 | 0,538675132 |
| B <sup>-C</sup> | Stress Respo    | Oxidative stress   | Oxidative_stress  | Iron-binding fe | 0,010877101   | 0,445610283 | 24,12903226   | 19,56848845  | 251,782269  | 144,2479851 | 0,572907638 |
| B <sup>-C</sup> | Cofactors, Vit  | Tetrapyrroles      | Chlorophyll_Bio   | Chlorophyllide  | 0,018912156   | 0,513968466 | 26,83026585   | 26,77032572  | 126,8900651 | 131,4393698 | 1,035852332 |
| B <sup>-C</sup> | Clustering-ba   | NULL               | Bacterial_R-met   | Polyribonucle   | 0,015548111   | 0,497800873 | 26,26950355   | 1,240119337  | 213,8978257 | 124,1512805 | 0,580423293 |
| B <sup>-C</sup> | Amino Acids a   | Lysine, threonine  | Methionine_Bio    | Adenosylhom     | 0,01510651    | 0,496170716 | 27,1965812    | 27,15326735  | 237,6640064 | 94,2991198  | 0,396774931 |
| B <sup>-C</sup> | Clustering-ba   | Cytochrome bioge   | CBSS-196164.1     | Iron-sulfur clu | 0,013138225   | 0,459522057 | 26,93167702   | 26,0925204   | 279,1321558 | 91,72864859 | 0,328620858 |
| B <sup>-C</sup> | Cofactors, Vit  | Tetrapyrroles      | Chlorophyll_Bio   | Chlorophyllide  | 0,042753207   | 0,692585328 | 26,98333333   | 26,13191539  | 73,18593547 | 83,43637255 | 1,140060204 |
| B <sup>-C</sup> | Cell Division a | NULL               | Macromolecular    | R polymerase    | 0,013349701   | 0,459522057 | 27,14225053   | 26,12575311  | 203,2721342 | 82,2119472  | 0,404442781 |
| B <sup>-C</sup> | Respiration     | Electron acceptin  | Termil_cytochro   | Cytochrome c    | 0,037739907   | 0,668737836 | 26,98333333   | 26,87303645  | 164,2211187 | 69,95150609 | 0,425959259 |
| B <sup>-C</sup> | Protein Metab   | Protein biosynthe  | Ribosome_LSU      | LSU ribosoma    | 0,007730098   | 0,397995567 | 26,95235455   | 0,110213775  | 149,6464008 | 65,20898848 | 0,435753805 |
| B <sup>-C</sup> | Stress Respo    | Cold shock         | Cold_shock,_Cs    | Cold shock pr   | 0,000898443   | 0,201597273 | 27,08860759   | 0,034568615  | 139,6851671 | 64,51742763 | 0,461877442 |
| B <sup>-C</sup> | Clustering-ba   | NULL               | CBSS-312309.3     | SSU ribosoma    | 0,045955023   | 0,706002571 | 27,4790287    | 27,18223216  | 104,7329232 | 61,69925598 | 0,589110416 |
| B <sup>-C</sup> | Cofactors, Vit  | Tetrapyrroles      | Chlorophyll_Bio   | Chlorophyllide  | 0,01712239    | 0,513647922 | 27,08860759   | 26,89568572  | 50,57549517 | 57,83074281 | 1,143453813 |
| B <sup>-C</sup> | Protein Metab   | Protein biosynthe  | Ribosome_SSU      | SSU ribosoma    | 0,007072758   | 0,387541563 | 27,36383442   | 26,47603665  | 83,2428701  | 57,44353508 | 0,690071534 |
| B <sup>-C</sup> | R Metabolism    | Transcription      | Transcription_fa  | Transcription   | 0,005377466   | 0,325208649 | 26,83026585   | 26,21113625  | 116,7379163 | 56,64057849 | 0,485194359 |
| B <sup>-C</sup> | Carbohydrate    | Central carbohyd   | Glyoxylate_bypa   | Citrate syntha  | 0,017040458   | 0,513647922 | 25,75527426   | 0,827179006  | 127,8664086 | 54,83891016 | 0,428876597 |
| B <sup>-C</sup> | Carbohydrate    | Organic acids      | Propiote-CoA_t    | Aconitate hyd   | 0,042583185   | 0,692585328 | 27,2516129    | 27,0280116   | 169,4271778 | 54,5126557  | 0,32174682  |
| B <sup>-C</sup> | Stress Respo    | Cold shock         | Cold_shock,_Cs    | Cold shock pr   | 0,000899515   | 0,201597273 | 26,93167702   | 0,032286244  | 81,7673666  | 48,64540129 | 0,594924397 |
| B <sup>-C</sup> | Protein Metab   | Protein biosynthe  | Ribosome_LSU      | LSU ribosoma    | 0,010836065   | 0,445610283 | 26,83026585   | 26,23290685  | 121,6574488 | 48,48937338 | 0,398572992 |
| B <sup>-C</sup> | R Metabolism    | R processing and   | ATP-dependent     | ATP-depende     | 0,000144002   | 0,127594164 | 27,14225053   | 27,06740774  | 64,71723479 | 47,8056007  | 0,738684229 |
| B <sup>-C</sup> | Cofactors, Vit  | Tetrapyrroles      | Chlorophyll_Bio   | Protoporphyrin  | 0,018054117   | 0,513647922 | 26,88065844   | 24,80745526  | 44,44562012 | 44,98923392 | 1,012230987 |
| B <sup>-C</sup> | Protein Metab   | Protein biosynthe  | Ribosome_LSU      | LSU ribosoma    | 0,017774826   | 0,513647922 | 27,1965812    | 0,741152789  | 96,30967166 | 43,93905001 | 0,456226766 |
| B <sup>-C</sup> | Photosynthes    | Electron transport | Photosystem_II    | Photosynthetic  | 0,007296898   | 0,387541563 | 27,78082192   | 27,31860492  | 36,68123024 | 41,49846165 | 1,131326877 |
| B <sup>-C</sup> | Carbohydrate    | Central carbohyd   | TCA_Cycle         | Isocitrate deh  | 0,00372645    | 0,301583391 | 27,1965812    | 27,15911884  | 93,42581798 | 41,2269577  | 0,441280136 |
| B <sup>-C</sup> | Iron acquisiti  | NULL               | Iron_acquisition  | TonB-depend     | 0,003559612   | 0,301583391 | 27,42105263   | 27,20872643  | 92,88359143 | 41,2172773  | 0,443751977 |
| B <sup>-C</sup> | Photosynthes    | Electron transport | Photosystem_II    | Light-harvesti  | 0,038492076   | 0,668737836 | 27,14225053   | 27,08194446  | 44,08506851 | 40,31061651 | 0,914382531 |
| B <sup>-C</sup> | Clustering-ba   | Tricarboxylate tra | CBSS-49338.1      | TRAP-type C     | 0,038909006   | 0,668737836 | 26,98333333   | 26,19145889  | 90,65294674 | 40,19129758 | 0,44335346  |
| B <sup>-C</sup> | Protein Metab   | Protein biosynthe  | Ribosome_LSU      | LSU ribosoma    | 0,010080253   | 0,441445584 | 22,39101677   | 3,788933234  | 116,3336872 | 40,04125223 | 0,344193098 |
| B <sup>-C</sup> | Protein Metab   | Protein biosynthe  | Ribosome_SSU      | SSU ribosoma    | 0,010801179   | 0,445610283 | 27,4790287    | 27,43352026  | 107,4447902 | 39,14550283 | 0,364331325 |
| B <sup>-C</sup> | Clustering-ba   | NULL               | CBSS-235.1.pe     | GTP-binding p   | 0,054910452   | 0,789467255 | 27,08860759   | 0,068406939  | 65,78365132 | 38,79273286 | 0,589701728 |
| B <sup>-C</sup> | Protein Metab   | Protein biosynthe  | Ribosome_SSU      | SSU ribosoma    | 0,022977321   | 0,528302042 | 27,90740741   | 27,37652762  | 71,16064639 | 38,51535269 | 0,541245121 |
| B <sup>-C</sup> | R Metabolism    | Transcription      | Transcription_in  | R polymerase    | 0,02378542    | 0,539419342 | 27,2516129    | 23,82492081  | 91,74830108 | 38,1596345  | 0,415916524 |
| B <sup>-C</sup> | Stress Respo    | Cold shock         | Cold_shock,_Cs    | Cold shock pr   | 0,004923354   | 0,307507824 | 27,30735931   | 27,25015275  | 56,80883225 | 37,88979682 | 0,666970176 |
| B <sup>-C</sup> | Photosynthes    | Light-harvesting c | Bacterial_light-h | Light-harvesti  | 0,037568528   | 0,668737836 | 26,83026585   | 26,21080041  | 49,60066567 | 36,32077781 | 0,732263919 |
| B <sup>-C</sup> | Clustering-ba   | Cell Division      | CBSS-393130.3     | SSU ribosoma    | 0,016710481   | 0,513647922 | 26,39808153   | 0,508856927  | 96,08779392 | 35,24321791 | 0,366781424 |
| B <sup>-C</sup> | R Metabolism    | R processing and   | tR_modification   | Cysteine desu   | 0,001933269   | 0,263062612 | 26,83026585   | 26,81087777  | 89,48623283 | 33,5017235  | 0,374378521 |
| B <sup>-C</sup> | Cofactors, Vit  | Folate and pterine | YgfZ              | Formate dehy    | 0,033879264   | 0,65558573  | 27,14225053   | 0,690199529  | 57,10694683 | 32,52366608 | 0,569522061 |
| B <sup>-C</sup> | Protein Metab   | Protein biosynthe  | Ribosome_SSU      | SSU ribosoma    | 0,008208903   | 0,406180771 | 27,00599749   | 0,148107795  | 80,89342864 | 32,49343246 | 0,401681978 |
| B <sup>-C</sup> | D Metabolism    | NULL               | D_structural_pro  | D-binding pro   | 0,024515805   | 0,552693581 | 27,90740741   | 0,333446863  | 79,61869374 | 32,10360801 | 0,403216965 |
| B <sup>-C</sup> | Clustering-ba   | Cytochrome bioge   | CBSS-196164.1     | Iron-sulfur clu | 0,002733836   | 0,301583391 | 27,65765766   | 25,01432089  | 91,07418572 | 28,491422   | 0,312837516 |

|                 |                 |                    |                   |                 |             |             |             |             |             |             |             |
|-----------------|-----------------|--------------------|-------------------|-----------------|-------------|-------------|-------------|-------------|-------------|-------------|-------------|
| B <sup>-C</sup> | Carbohydrate    | Central carbohyd   | TCA_Cycle         | Malate dehyd    | 0,013011227 | 0,459522057 | 27,08860759 | 27,06910245 | 67,95917405 | 28,41717281 | 0,41815065  |
| B <sup>-C</sup> | Clustering-ba   | NULL               | Bacterial_Cell    | Cytoplasmic a   | 0,011876376 | 0,451747005 | 27,14225053 | 0,096823345 | 57,90595646 | 27,52219572 | 0,475291272 |
| B <sup>-C</sup> | Photosynthes    | Electron transport | Photosystem_II    | Photosynthesi   | 0,020273481 | 0,514946419 | 26,93167702 | 26,76713826 | 28,29231658 | 26,37290886 | 0,932157987 |
| B <sup>-C</sup> | Cofactors, Vit  | Tetrapyrroles      | Chlorophyll_Bio   | Light-indepen   | 0,012559465 | 0,459522057 | 26,83026585 | 26,75375805 | 25,65570417 | 25,75468436 | 1,003858019 |
| B <sup>-C</sup> | Stress Respo    | Detoxification     | Uptake_of_sele    | Various polyo   | 0,038815176 | 0,668737836 | 27,36383442 | 26,2945921  | 50,97896584 | 25,44327661 | 0,49909362  |
| B <sup>-C</sup> | Cofactors, Vit  | Tetrapyrroles      | Chlorophyll_Bio   | Light-indepen   | 0,003961897 | 0,301583391 | 27,53777778 | 25,07217959 | 28,15114652 | 24,91042021 | 0,884881197 |
| B <sup>-C</sup> | Protein Metab   | Protein biosynthe  | Ribosome_LSU      | LSU ribosoma    | 0,003310962 | 0,301583391 | 22,2654489  | 3,946649249 | 84,37939141 | 24,43635896 | 0,289601034 |
| B <sup>-C</sup> | Protein Metab   | Protein biosynthe  | Ribosome_SSU      | SSU ribosoma    | 0,019476412 | 0,513968466 | 23,09440065 | 3,681136556 | 42,70234627 | 23,69229553 | 0,55482421  |
| B <sup>-C</sup> | Cofactors, Vit  | Tetrapyrroles      | Chlorophyll_Bio   | 2-desacetyl-2   | 0,008052476 | 0,406180771 | 27,03563941 | 26,23371005 | 25,1691535  | 23,63933919 | 0,939218683 |
| B <sup>-C</sup> | D Metabolism    | D replication      | D_topoisomeras    | D gyrase sub    | 0,007237867 | 0,387541563 | 27,65765766 | 0,423644552 | 68,74018758 | 23,54774419 | 0,342561535 |
| B <sup>-C</sup> | Phages, Prop    | Pathogenicity isla | Staphylococcal    | GMP synthas     | 0,022011331 | 0,52744133  | 27,1965812  | 0,783622146 | 41,70170646 | 23,07085627 | 0,553235304 |
| B <sup>-C</sup> | Clustering-ba   | Clustering-based   | CBSS-262719.3     | LSU ribosoma    | 0,034728274 | 0,661040019 | 27,08860759 | 26,03953891 | 32,11378414 | 22,21475263 | 0,691751322 |
| B <sup>-C</sup> | Protein Metab   | Protein biosynthe  | Ribosome_biog     | Ribonuclease    | 0,03389774  | 0,65558573  | 27,65765766 | 25,86057808 | 37,581835   | 21,75655476 | 0,578911455 |
| B <sup>-C</sup> | Amino Acids a   | Lysine, threonine, | Cysteine_Biosyn   | Sulfate perme   | 0,025669779 | 0,555692383 | 27,08860759 | 26,16397594 | 31,44898442 | 20,81387145 | 0,661829685 |
| B <sup>-C</sup> | Nucleosides a   | Purines            | De_Novo_Purin     | Amidophosph     | 0,013538361 | 0,460546022 | 27,4790287  | 27,0862862  | 31,62634642 | 20,3587851  | 0,643728644 |
| B <sup>-C</sup> | Amino Acids a   | Branched-chain a   | Isoleucine_degr   | 3-hydroxyacyl   | 0,032964631 | 0,647398172 | 27,46106239 | 26,92500672 | 52,04227088 | 20,1363638  | 0,386923235 |
| B <sup>-C</sup> | Miscellaneous   | Plant-Prokaryote   | PROSC             | Aspartate am    | 0,036516276 | 0,668737836 | 27,14225053 | 26,35428882 | 43,68594925 | 19,23274654 | 0,440250169 |
| B <sup>-C</sup> | Cell Division a | NULL               | Two_cell_divisio  | Sigl recognitic | 0,044822608 | 0,697037291 | 27,36383442 | 25,05564853 | 52,98865965 | 18,90043185 | 0,356688242 |
| B <sup>-C</sup> | Protein Metab   | Protein biosynthe  | Ribosome_LSU      | LSU ribosoma    | 0,013079816 | 0,459522057 | 22,74601643 | 5,869974176 | 32,44544761 | 18,64785203 | 0,574744792 |
| B <sup>-C</sup> | Carbohydrate    | Central carbohyd   | TCA_Cycle         | Fumarate hyc    | 0,039471822 | 0,671373403 | 26,7804878  | 26,20980026 | 35,0558011  | 18,12569023 | 0,517052518 |
| B <sup>-C</sup> | Clustering-ba   | Tricarboxylate tra | CBSS-49338.1      | TRAP-type C     | 0,052528463 | 0,763868101 | 26,7804878  | 26,09231714 | 40,49637759 | 17,76557041 | 0,438695297 |
| B <sup>-C</sup> | D Metabolism    | D repair           | D_repair_bacte    | SOS-respons     | 0,025869045 | 0,556842145 | 27,08860759 | 26,37785181 | 23,70615082 | 17,53237141 | 0,739570567 |
| B <sup>-C</sup> | Carbohydrate    | Central carbohyd   | Glyoxylate_bype   | Aconitate hyd   | 0,001361971 | 0,248238716 | 26,11258602 | 0,153297398 | 32,86310623 | 17,08108147 | 0,519764667 |
| B <sup>-C</sup> | R Metabolism    | R processing and   | Queuosine-Arch    | S-adenosylme    | 0,00980866  | 0,438065262 | 22,97880217 | 3,153712971 | 38,93236766 | 16,92651986 | 0,434767287 |
| B <sup>-C</sup> | Amino Acids a   | Branched-chain a   | Branched-Chain    | Dihydroxy-aci   | 0,023003498 | 0,528302042 | 27,08860759 | 26,31699349 | 43,29735979 | 16,88900229 | 0,390070027 |
| B <sup>-C</sup> | Cofactors, Vit  | Tetrapyrroles      | Chlorophyll_Bio   | Chlorophyll a   | 0,005370821 | 0,325208649 | 27,1965812  | 24,72046894 | 14,53666288 | 15,9281268  | 1,095721001 |
| B <sup>-C</sup> | Clustering-ba   | NULL               | KH_domain_R       | SSU ribosoma    | 0,003837035 | 0,301583391 | 22,90410114 | 3,278780209 | 42,66496127 | 15,87883915 | 0,372175169 |
| B <sup>-C</sup> | R Metabolism    | R processing and   | ATP-dependent     | ATP-depende     | 0,00636796  | 0,356793046 | 27,42105263 | 24,93542979 | 22,10793145 | 15,22059447 | 0,688467598 |
| B <sup>-C</sup> | Cofactors, Vit  | Pyridoxine         | Pyridoxin_(Vitan  | 1-deoxy-D-xy    | 0,014911272 | 0,494016918 | 27,4790287  | 27,08268854 | 48,15160088 | 15,08699777 | 0,31332287  |
| B <sup>-C</sup> | Photosynthes    | Light-harvesting c | Bacterial_light-h | Light-harvesti  | 0,018739386 | 0,513647922 | 27,03563941 | 26,38219974 | 18,51143639 | 13,99005498 | 0,755751995 |
| B <sup>-C</sup> | Respiration     | Electron doting re | Respiratory_Co    | DH-ubiquinon    | 0,013382192 | 0,459522057 | 27,11535986 | 24,52852459 | 30,8531536  | 13,61470927 | 0,441274479 |
| B <sup>-C</sup> | R Metabolism    | R processing and   | tR_modification   | FIG137478: F    | 0,045870738 | 0,706002571 | 27,03563941 | 26,79175349 | 20,25636632 | 13,43333253 | 0,663165956 |
| B <sup>-C</sup> | Clustering-ba   | NULL               | CBSS-251221.1     | UDP-3-O-[3-h    | 0,000417243 | 0,146787646 | 27,36383442 | 24,93692708 | 39,5476526  | 13,35465366 | 0,337685116 |
| B <sup>-C</sup> | Carbohydrate    | Central carbohyd   | Dehydrogese_c     | Pyruvate dehy   | 0,000301404 | 0,127594164 | 26,89938637 | 0,047760424 | 27,06724529 | 13,19840911 | 0,487615528 |
| B <sup>-C</sup> | R Metabolism    | R processing and   | R_processing_a    | 3'-to-5' exorib | 0,02792675  | 0,578040847 | 27,42105263 | 0,688926495 | 27,47429449 | 13,15117256 | 0,478671893 |
| B <sup>-C</sup> | Metabolism of   | Aerobic degradati  | Aerobic_benzoa    | Glutaryl-CoA    | 0,011541452 | 0,451747005 | 27,2516129  | 24,73034562 | 37,78891136 | 13,07158494 | 0,345910598 |
| B <sup>-C</sup> | Amino Acids a   | Lysine, threonine, | Methionine_Bios   | O-acetylhomoc   | 0,015463505 | 0,497800873 | 27,00599749 | 0,240410288 | 25,27516028 | 13,01043912 | 0,514751993 |
| B <sup>-C</sup> | Protein Metab   | Protein biosynthe  | tR_aminoacylati   | Aspartyl-tR sy  | 0,00451362  | 0,301583391 | 24,50290365 | 1,847028344 | 28,19445901 | 12,7053201  | 0,45063181  |
| B <sup>-C</sup> | Carbohydrate    | Polysaccharides    | Cellulosome       | 1,4-alpha-gluc  | 0,014205116 | 0,478951261 | 27,1965812  | 27,181463   | 21,37858052 | 12,10470817 | 0,566207291 |
| B <sup>-C</sup> | D Metabolism    | D repair           | D_repair_bacte    | D mismatch r    | 0,00027445  | 0,127594164 | 27,2516129  | 27,06107238 | 16,55874967 | 11,40470476 | 0,688741903 |
| B <sup>-C</sup> | Fatty Acids, L  | Fatty acids        | Fatty_Acid_Bios   | (3R)-hydroxyr   | 0,026332989 | 0,563644309 | 26,7804878  | 26,15903862 | 21,21251944 | 11,32408663 | 0,533839776 |
| B <sup>-C</sup> | Cofactors, Vit  | Riboflavin, FMN,   | Riboflavin,_FMN   | GTP cyclohyd    | 0,001669521 | 0,248238716 | 20,08798646 | 3,159608933 | 22,47324699 | 11,11954615 | 0,494790368 |
| B <sup>-C</sup> | Respiration     | Electron acceptin  | Ubiquinone_Me     | ubiquinol cyto  | 0,00449106  | 0,301583391 | 27,1965812  | 26,30469237 | 28,81853275 | 11,06786108 | 0,384053594 |

|                 |                |                    |                   |                 |             |             |             |             |             |             |             |
|-----------------|----------------|--------------------|-------------------|-----------------|-------------|-------------|-------------|-------------|-------------|-------------|-------------|
| B <sup>-C</sup> | Amino Acids    | Branched-chain a   | Branched_chain    | Electron trans  | 0,017401675 | 0,513647922 | 26,88065844 | 26,23640426 | 27,6939634  | 11,04600507 | 0,398859669 |
| B <sup>-C</sup> | Respiration    | Electron doting re | Respiratory_def   | Proline dehyd   | 0,028005515 | 0,578040847 | 23,13348651 | 18,14138267 | 32,96327756 | 10,90339781 | 0,33077408  |
| B <sup>-C</sup> | Stress Respo   | Cold shock         | Cold_shock_Cs     | Cold shock pr   | 0,048589415 | 0,723147148 | 22,5882059  | 1,037367085 | 13,72876193 | 10,00654579 | 0,728874595 |
| B <sup>-C</sup> | Clustering-ba  | Ribosome-related   | A_Gammaprote      | 2-Keto-3-deox   | 0,004670189 | 0,301583391 | 27,14225053 | 24,6284802  | 18,11949177 | 9,985665975 | 0,551100776 |
| B <sup>-C</sup> | Phosphorus M   | NULL               | Phosphate_met     | Probable low    | 0,007425337 | 0,387541563 | 27,2516129  | 27,23914933 | 11,89924938 | 9,45203768  | 0,794338985 |
| B <sup>-C</sup> | D Metabolism   | D repair           | D_repair_bacte    | D repair prote  | 0,003823602 | 0,301583391 | 27,2516129  | 26,32143276 | 10,31597782 | 9,353756367 | 0,906725134 |
| B <sup>-C</sup> | Protein Metab  | Protein processin  | Ribosomal_prot    | Ribosomal pr    | 0,034693925 | 0,661040019 | 27,08860759 | 24,01649303 | 12,42406514 | 9,18670888  | 0,739428583 |
| B <sup>-C</sup> | Cofactors, Vit | Folate and pterine | YgfZ              | Aspartate car   | 0,021789274 | 0,52744133  | 27,08860759 | 26,87051382 | 15,13375602 | 9,183366535 | 0,606813439 |
| B <sup>-C</sup> | Respiration    | Electron doting re | (+)-translocating | (+)-translocati | 0,039031799 | 0,668737836 | 23,73006135 | 4,799252185 | 17,69115798 | 9,048758626 | 0,511484813 |
| B <sup>-C</sup> | Cofactors, Vit | Tetrapyrroles      | Heme_and_Sirc     | Porphobilinog   | 0,018618491 | 0,513647922 | 26,83026585 | 26,31895672 | 18,19802858 | 8,839131113 | 0,485719158 |
| B <sup>-C</sup> | Photosynthes   | Light-harvesting c | Bacterial_light-h | Light-harvesti  | 0,001330529 | 0,248238716 | 22,5882059  | 0,317569817 | 7,664623474 | 8,817281268 | 1,150386747 |
| B <sup>-C</sup> | Virulence, Dis | Resistance to ant  | Arsenic_resistar  | Arsenical-resi  | 0,021846087 | 0,52744133  | 27,03563941 | 26,11405175 | 10,84074014 | 8,559210969 | 0,789541199 |
| B <sup>-C</sup> | Carbohydrate   | Organic acids      | Isobutyryl-CoA    | Methylmalote    | 0,003910533 | 0,301583391 | 26,39808153 | 24,34548076 | 13,79190525 | 8,535076475 | 0,618846803 |
| B <sup>-C</sup> | Clustering-ba  | NULL               | CBSS-87626.3.     | Xaa-Pro amin    | 0,001504861 | 0,248238716 | 27,08860759 | 0,018845319 | 16,02791424 | 8,185561329 | 0,510706584 |
| B <sup>-C</sup> | Cofactors, Vit | Tetrapyrroles      | Heme_and_Sirc     | Glutamyl-tR r   | 0,025601718 | 0,555692383 | 27,14225053 | 0,728754259 | 8,205306871 | 8,173392215 | 0,996110486 |
| B <sup>-C</sup> | Carbohydrate   | Fermentation       | Acetone_Butanc    | 3-hydroxybuty   | 0,016941142 | 0,513647922 | 26,54647788 | 25,78988672 | 12,57722062 | 7,941576642 | 0,631425406 |
| B <sup>-C</sup> | Miscellaneous  | Plant-Prokaryote   | Scaffold_protein  | PaaD-like pro   | 0,010708601 | 0,445610283 | 23,31548237 | 21,25292747 | 20,10994445 | 7,887826838 | 0,392235138 |
| B <sup>-C</sup> | Fatty Acids, L | Isoprenoids        | Isoprenoid_Bios   | 4-hydroxy-3-n   | 0,000576928 | 0,169084296 | 27,03563941 | 24,73855088 | 17,01084606 | 7,84082613  | 0,460930991 |
| B <sup>-C</sup> | Carbohydrate   | NULL               | Sugar_utilization | Glucose-6-ph    | 0,01862515  | 0,513647922 | 24,02547771 | 3,476993451 | 12,04406729 | 7,714792633 | 0,640547121 |
| B <sup>-C</sup> | Stress Respo   | NULL               | Carbon_Starvat    | Carbon stora    | 0,035560386 | 0,667414141 | 27,65765766 | 27,27497892 | 17,33797212 | 7,564089924 | 0,436273047 |
| B <sup>-C</sup> | Respiration    | Electron doting re | Respiratory_Co    | DH ubiquinon    | 0,018032708 | 0,513647922 | 26,7804878  | 26,76129198 | 19,67737786 | 7,550225793 | 0,383700808 |
| B <sup>-C</sup> | Cell Wall and  | Capsular and extr  | dTDP-rhamnose     | Glucose-1-ph    | 0,003493069 | 0,301583391 | 23,25736176 | 2,645624481 | 18,2727633  | 7,468459034 | 0,408720833 |
| B <sup>-C</sup> | Cofactors, Vit | Riboflavin, FMN,   | riboflavin_to_FA  | 3,4-dihydroxy   | 2,96734E-05 | 0,037685234 | 26,05117996 | 0,36352127  | 14,49623083 | 7,438627364 | 0,513142171 |
| B <sup>-C</sup> | Cofactors, Vit | Tetrapyrroles      | Chlorophyll_Bio   | Geranylgeran    | 0,016224902 | 0,51088327  | 24,61029009 | 0,174309751 | 8,537507428 | 7,324292145 | 0,857895845 |
| B <sup>-C</sup> | Clustering-ba  | Ribosomal Protein  | A_Gram-positiv    | ATP-depende     | 0,035971384 | 0,668541337 | 27,65765766 | 27,45925417 | 7,34280897  | 7,270355372 | 0,990132714 |
| B <sup>-C</sup> | Carbohydrate   | One-carbon Meta    | Serine-glyoxylat  | Succinyl-CoA    | 0,042447936 | 0,692585328 | 24,81118881 | 1,174907344 | 56,36864607 | 7,265767885 | 0,128897328 |
| B <sup>-C</sup> | Respiration    | ATP synthases      | F0F1-type_ATP     | ATP synthase    | 0,013060613 | 0,459522057 | 24,68435511 | 2,357473369 | 9,912206206 | 7,103317266 | 0,716623234 |
| B <sup>-C</sup> | Carbohydrate   | Central carbohyd   | Pyruvate_metab    | Dihydrolipoan   | 0,003694108 | 0,301583391 | 27,30735931 | 24,72548168 | 15,39429134 | 7,078845604 | 0,459835757 |
| B <sup>-C</sup> | Clustering-ba  | NULL               | CBSS-211586.1     | Protein-L-isoa  | 0,033752269 | 0,65558573  | 25,67266416 | 0,866793567 | 9,880160726 | 7,025589985 | 0,711080536 |
| B <sup>-C</sup> | Nucleosides a  | Purines            | De_Novo_Purin     | Phosphoribos    | 0,0272925   | 0,577691259 | 23,42321703 | 2,675041969 | 14,81031728 | 7,001341824 | 0,472734087 |
| B <sup>-C</sup> | Secondary Me   | Plant Hormones     | Auxin_biosynthe   | Anthranilate p  | 0,002661332 | 0,301583391 | 27,14225053 | 24,80620195 | 7,356775462 | 6,878047996 | 0,934926998 |
| B <sup>-C</sup> | Protein Metab  | Protein biosynthe  | tR_aminoacylati   | Arginyl-tR syn  | 0,025331417 | 0,555139763 | 22,71224488 | 5,043404925 | 15,71065052 | 6,872065924 | 0,437414473 |
| B <sup>-C</sup> | Miscellaneous  | Plant-Prokaryote   | At4g10620_At3     | lojap protein   | 0,019728657 | 0,513968466 | 26,88065844 | 26,16302204 | 16,43704377 | 6,801179943 | 0,413771481 |
| B <sup>-C</sup> | Carbohydrate   | Central carbohyd   | Pyruvate_metab    | Pyruvate oxid   | 0,022578013 | 0,528302042 | 23,38493523 | 2,425092755 | 12,78728062 | 6,785689714 | 0,530659326 |
| B <sup>-C</sup> | Fatty Acids, L | Isoprenoids        | Carotenoids       | Geranylgeran    | 0,005973504 | 0,350139213 | 27,30735931 | 27,10900747 | 7,409274758 | 6,70527817  | 0,904984413 |
| B <sup>-C</sup> | Photosynthes   | Electron transport | Photosystem_II    | Photosynthesi   | 0,007350815 | 0,387541563 | 22,35690236 | 3,009234798 | 7,384606939 | 6,692150726 | 0,906229781 |
| B <sup>-C</sup> | Carbohydrate   | Central carbohyd   | Glycolysis_and    | Fructose-1,6-   | 0,000209904 | 0,127594164 | 24,85680513 | 0,810273647 | 9,871155009 | 6,449467884 | 0,65336507  |
| B <sup>-C</sup> | D Metabolism   | NULL               | D_structural_pro  | Integration hc  | 0,003298745 | 0,301583391 | 25,36067947 | 24,03759816 | 11,697033   | 6,179047613 | 0,528257688 |
| B <sup>-C</sup> | Nucleosides a  | Pyrimidines        | pyrimidine_conv   | Purine nucleo   | 0,006163288 | 0,355789806 | 27,90740741 | 27,5007503  | 11,12365975 | 5,969663701 | 0,536663637 |
| B <sup>-C</sup> | Photosynthes   | Light-harvesting c | Bacterial_light-h | Light-harvesti  | 0,015898026 | 0,504762329 | 27,1965812  | 26,1797121  | 4,827173977 | 5,872374698 | 1,216524353 |
| B <sup>-C</sup> | Photosynthes   | Light-harvesting c | Bacterial_light-h | Light-harvesti  | 0,008144218 | 0,406180771 | 26,83026585 | 26,19066937 | 6,038885048 | 5,808078308 | 0,961779908 |
| B <sup>-C</sup> | Fatty Acids, L | Isoprenoids        | Carotenoids       | 2-vinyl bacter  | 0,002111235 | 0,277372535 | 27,71882086 | 25,00837062 | 6,226769025 | 5,778952066 | 0,92808197  |
| B <sup>-C</sup> | Cofactors, Vit | Tetrapyrroles      | Heme_and_Sirc     | Porphobilinog   | 0,019909582 | 0,513968466 | 26,00944232 | 0,659385546 | 8,327900083 | 5,73386448  | 0,688512641 |

|                 |                |                     |                   |                  |             |             |             |             |             |             |             |
|-----------------|----------------|---------------------|-------------------|------------------|-------------|-------------|-------------|-------------|-------------|-------------|-------------|
| B <sup>-c</sup> | Miscellaneous  | Plant-Prokaryote    | COG3146_expe      | Fumarylaceto     | 0,004394567 | 0,301583391 | 26,79542398 | 26,74773337 | 18,04597366 | 5,670304786 | 0,3142144   |
| B <sup>-c</sup> | Stress Respo   | Oxidative stress    | Glutathione: Bic  | Glutamate--cy    | 0,048883331 | 0,72469062  | 26,0877193  | 25,45851477 | 11,17847395 | 5,6109532   | 0,501942682 |
| B <sup>-c</sup> | Membrane Tr    | Protein secretion   | Widespread_co     | Flp pilus asse   | 0,02535284  | 0,555139763 | 27,2516129  | 26,02739635 | 3,9899671   | 5,5502495   | 1,391051445 |
| B <sup>-c</sup> | Cofactors, Vit | Tetrapyrroles       | Coenzyme_B12      | CobN compo       | 0,008329292 | 0,406853895 | 26,88065844 | 0,05390602  | 4,936688925 | 5,305998004 | 1,074809064 |
| B <sup>-c</sup> | Respiration    | Electron acceptin   | Termin_cytochro   | putative Cyto    | 0,022717854 | 0,528302042 | 27,20015232 | 25,23902923 | 8,415925265 | 5,277882049 | 0,627130337 |
| B <sup>-c</sup> | Miscellaneous  | Plant-Prokaryote    | COG1836           | Undecapreny      | 0,029129853 | 0,590344367 | 27,97202797 | 26,02276441 | 12,42330803 | 5,093398257 | 0,409987279 |
| B <sup>-c</sup> | Nitrogen Meta  | NULL                | Nitrate_and_nitr  | Nitrite reducta  | 0,037411045 | 0,668737836 | 27,03563941 | 24,79114471 | 5,965766915 | 5,040728757 | 0,844942229 |
| B <sup>-c</sup> | Miscellaneous  | Plant-Prokaryote    | COG3146_expe      | Homogentisa      | 0,003839323 | 0,301583391 | 23,09440065 | 21,15338594 | 16,32031229 | 5,003996071 | 0,306611539 |
| B <sup>-c</sup> | Metabolism of  | Metabolism of cer   | N-heterocyclic_e  | Isoquinoline 1   | 0,020411731 | 0,515024477 | 26,73131313 | 25,56179129 | 13,19462576 | 4,998907276 | 0,378859345 |
| B <sup>-c</sup> | Clustering-ba  | Chromosome Rep      | SeqA_and_Co-c     | Phosphogluc      | 0,000423796 | 0,146787646 | 20,41710828 | 11,66712318 | 16,69556302 | 4,966980925 | 0,29750305  |
| B <sup>-c</sup> | Fatty Acids, L | Isoprenoids         | Carotenoids       | Phytoene des     | 0,001496042 | 0,248238716 | 27,2516129  | 26,20706092 | 4,720996028 | 4,965788758 | 1,051851925 |
| B <sup>-c</sup> | Motility and C | NULL                | Bacterial_Chem    | Maltose/malt     | 0,000679045 | 0,173567154 | 25,36067947 | 0,717669604 | 8,12246934  | 4,946600732 | 0,609002081 |
| B <sup>-c</sup> | Stress Respo   | NULL                | Carbon_Starvat    | Stringent star   | 0,020973158 | 0,521629502 | 24,55201288 | 2,624251946 | 6,404187254 | 4,934553778 | 0,770519909 |
| B <sup>-c</sup> | Cell Wall and  | Gram-Negative ce    | KDO2-Lipid_A_1    | Arabinose 5-p    | 0,000481837 | 0,152983146 | 22,84957098 | 3,805530145 | 7,029025421 | 4,837080699 | 0,688158089 |
| B <sup>-c</sup> | Membrane Tr    | ABC transporters    | ABC_transporte    | Oligopeptide f   | 0,021932504 | 0,52744133  | 27,2516129  | 26,9564204  | 11,01829277 | 4,723125645 | 0,428662202 |
| B <sup>-c</sup> | Sulfur Metabo  | NULL                | Sulfur_oxidation  | Sulfur oxidati   | 0,052087191 | 0,760353244 | 27,2516129  | 25,03092696 | 8,443104974 | 4,682452251 | 0,554588894 |
| B <sup>-c</sup> | Cofactors, Vit | Coenzyme A          | Coenzyme_A_B      | Phosphopant      | 0,009787301 | 0,438065262 | 25,77852916 | 1,278143793 | 8,95974344  | 4,627268123 | 0,516450963 |
| B <sup>-c</sup> | Clustering-ba  | Molybdopterin oxi   | CBSS-269799.3     | Molybdopterin    | 0,003910686 | 0,301583391 | 23,76766936 | 23,67951367 | 8,764561177 | 4,424405913 | 0,504806324 |
| B <sup>-c</sup> | Stress Respo   | NULL                | Hfl_operon        | GTP-binding p    | 0,020135309 | 0,514869323 | 24,80993747 | 23,79411398 | 6,925895182 | 4,395513631 | 0,63464917  |
| B <sup>-c</sup> | Carbohydrate   | Monosaccharides     | D-Galacturote_α   | 2-deoxy-D-glu    | 0,009682883 | 0,438065262 | 23,45988461 | 21,4262334  | 5,717877378 | 4,354607836 | 0,761577688 |
| B <sup>-c</sup> | Carbohydrate   | Central carbohyd    | Pentose_phosph    | Transketolase    | 0,037371737 | 0,668737836 | 20,45192426 | 2,23334518  | 4,735857348 | 4,351009626 | 0,918737476 |
| B <sup>-c</sup> | Stress Respo   | Heat shock          | Heat_shock_dK     | Ribonuclease     | 0,0280676   | 0,578040847 | 22,67977636 | 2,263486568 | 6,577013645 | 4,301493549 | 0,654019253 |
| B <sup>-c</sup> | Respiration    | NULL                | Flavocytochrom    | Flavocytochro    | 0,044354546 | 0,692585328 | 23,57625492 | 10,69937378 | 8,917685235 | 4,299142658 | 0,48209177  |
| B <sup>-c</sup> | Cofactors, Vit | Riboflavin, FMN,    | Riboflavin,_FMN   | 6,7-dimethyl-8   | 0,043987457 | 0,692585328 | 26,7804878  | 26,1447061  | 5,952790116 | 4,286913561 | 0,720151975 |
| B <sup>-c</sup> | Clustering-ba  | NULL                | Bacterial_Cell_1  | Sigl recognitic  | 0,001669109 | 0,248238716 | 22,95583284 | 3,820589445 | 15,3946602  | 4,272121588 | 0,277506715 |
| B <sup>-c</sup> | Miscellaneous  | Plant-Prokaryote    | lojap             | ATP synthase     | 0,026931914 | 0,573243538 | 24,53905011 | 2,445334285 | 18,87705541 | 4,257309392 | 0,225528256 |
| B <sup>-c</sup> | Amino Acids &  | Branched-chain a    | Leucine_Degrac    | Branched-cha     | 0,020827841 | 0,521629502 | 23,82608696 | 5,422502743 | 7,901808507 | 4,057459674 | 0,513484941 |
| B <sup>-c</sup> | Carbohydrate   | CO2 fixation        | Calvin-Benson     | Ribose 5-pho     | 0,002215014 | 0,281306741 | 23,09440065 | 20,81708135 | 4,213177512 | 3,983331766 | 0,945445986 |
| B <sup>-c</sup> | Cofactors, Vit | Folate and pterine  | YgfZ              | Rhodanese-re     | 0,004851721 | 0,307507824 | 24,93617021 | 1,075342143 | 6,162524001 | 3,967513827 | 0,643813124 |
| B <sup>-c</sup> | R Metabolism   | R processing and    | R_pseudouridin    | Ribosomal lar    | 2,52015E-05 | 0,037685234 | 25,95146626 | 25,53341394 | 5,132873562 | 3,961758663 | 0,771840299 |
| B <sup>-c</sup> | Clustering-ba  | NULL                | Disulphide_relat  | FIG002984: F     | 0,003000565 | 0,301583391 | 27,2516129  | 27,12921359 | 3,897671572 | 3,932743982 | 1,008998298 |
| B <sup>-c</sup> | Amino Acids &  | Histidine Metabol   | Histidine_Biosyr  | Imidazoleglyc    | 0,010734155 | 0,445610283 | 23,73696345 | 21,08556574 | 5,859090075 | 3,807470594 | 0,649839915 |
| B <sup>-c</sup> | Amino Acids &  | Aromatic amino a    | Tryptophan_syn    | Phosphoribos     | 0,030319823 | 0,604809036 | 25,19708029 | 23,79148615 | 4,338483631 | 3,750442839 | 0,864459373 |
| B <sup>-c</sup> | Amino Acids &  | Proline and 4-hyd   | Proline,_4-hydro  | Proline imino    | 0,001759172 | 0,248238716 | 27,08860759 | 24,71243033 | 4,162920736 | 3,714344853 | 0,892244914 |
| B <sup>-c</sup> | R Metabolism   | R processing and    | tR_modification   | tR delta(2)-isc  | 0,039141348 | 0,668737836 | 20,19243986 | 2,865935014 | 2,900182449 | 3,709284661 | 1,278983211 |
| B <sup>-c</sup> | Cofactors, Vit | Lipoic acid         | Lipoic_acid_me    | Octanoate-[ac    | 0,041116609 | 0,692585328 | 27,2516129  | 0,701723266 | 6,054853142 | 3,701350283 | 0,611303065 |
| B <sup>-c</sup> | Protein Metab  | Protein biosynthe   | Ribosome_biog     | Ribosomal lar    | 0,050687946 | 0,748531301 | 27,1965812  | 26,16648325 | 2,749768711 | 3,646926747 | 1,326266727 |
| B <sup>-c</sup> | Nucleosides &  | Pyrimidines         | pyrimidine_conv   | Cytidylate kis   | 0,000246502 | 0,127594164 | 27,2516129  | 25,04124291 | 6,614678238 | 3,633435438 | 0,549298894 |
| B <sup>-c</sup> | Dormancy an    | NULL                | Persiste_Cells    | Cell division in | 0,025078231 | 0,555139763 | 23,17959957 | 13,50245542 | 4,275272067 | 3,630336384 | 0,849147453 |
| B <sup>-c</sup> | Protein Metab  | Selenoproteins      | Selenocysteine    | Selenide,wate    | 0,00385094  | 0,301583391 | 26,7804878  | 25,55235848 | 2,558883903 | 3,45277755  | 1,349329505 |
| B <sup>-c</sup> | Clustering-ba  | Recombination relat | CBSS-198094.1     | Recombination i  | 0,025078231 | 0,555139763 | 23,17959957 | 11,21035221 | 3,277376808 | 3,424049646 | 1,04475312  |
| B <sup>-c</sup> | Membrane Tr    | Uni- Sym- and An    | Proton-depende    | Di-/tripeptide   | 0,022236552 | 0,528302042 | 22,9181479  | 5,260227286 | 6,121731948 | 3,410389805 | 0,557095579 |
| B <sup>-c</sup> | Amino Acids &  | Arginine; urea cyc  | Putrescine_utiliz | Gamma-amin       | 0,028976561 | 0,590344367 | 27,2516129  | 26,39725053 | 7,336257826 | 3,39032196  | 0,462132335 |

|                 |                |                    |                   |                 |             |             |             |             |             |             |             |
|-----------------|----------------|--------------------|-------------------|-----------------|-------------|-------------|-------------|-------------|-------------|-------------|-------------|
| B <sup>-C</sup> | Fatty Acids, L | Isoprenoids        | Isoprenoid_Bios   | 1-deoxy-D-xylo  | 0,017601839 | 0,513647922 | 25,35030386 | 24,99579631 | 5,246487376 | 3,3654127   | 0,641460173 |
| B <sup>-C</sup> | Clustering-ba  | NULL               | Spore_Coat        | Spore coat pr   | 0,000287763 | 0,127594164 | 23,16584967 | 21,36591432 | 4,392211479 | 3,342266742 | 0,760953055 |
| B <sup>-C</sup> | R Metabolism   | R processing and   | tR_processing     | Ribonuclease    | 0,00445128  | 0,301583391 | 25,57841414 | 23,95755205 | 3,709897654 | 3,338447182 | 0,899875817 |
| B <sup>-C</sup> | Miscellaneous  | Plant-Prokaryote   | COG0451           | Undecaprenyl    | 0,003282156 | 0,301583391 | 22,51285413 | 3,718123998 | 5,011291687 | 3,308327324 | 0,660174568 |
| B <sup>-C</sup> | Cell Wall and  | NULL               | Recycling_of_P    | UDP-N-acetyl    | 0,010466226 | 0,445610283 | 27,14225053 | 25,5772952  | 4,041734803 | 3,18956228  | 0,789156745 |
| B <sup>-C</sup> | Clustering-ba  | Hypothetical Rela  | Hypothetical_Re   | Dihydroorotat   | 0,01338765  | 0,459522057 | 25,13885303 | 1,950130745 | 8,165581684 | 3,119613042 | 0,38204419  |
| B <sup>-C</sup> | Cofactors, Vit | Riboflavin, FMN,   | Flavodoxin        | Flavodoxin      | 0,001007325 | 0,213217076 | 22,43955612 | 3,538845182 | 3,007620294 | 3,112290392 | 1,034801633 |
| B <sup>-C</sup> | Nitrogen Meta  | NULL               | Nitrate_and_nitr  | Nitrate ABC tr  | 0,017330648 | 0,513647922 | 23,3133083  | 5,36823305  | 3,178471701 | 3,037774617 | 0,95573436  |
| B <sup>-C</sup> | Amino Acids a  | Histidine Metaboli | Histidine_Biosyr  | ATP phospho     | 0,03058294  | 0,606880222 | 26,7804878  | 24,69782607 | 3,725939989 | 2,951873892 | 0,792249446 |
| B <sup>-C</sup> | Miscellaneous  | NULL               | Broadly_distribu  | YpfJ protein, s | 0,01445924  | 0,483243004 | 25,73221289 | 25,25218522 | 2,616774027 | 2,900866654 | 1,108565976 |
| B <sup>-C</sup> | Carbohydrate   | Monosaccharides    | L-rhamnose_utili  | Predicted L-rt  | 0,035928612 | 0,668541337 | 27,90740741 | 24,94044642 | 2,990481423 | 2,856178239 | 0,955089778 |
| B <sup>-C</sup> | Miscellaneous  | Plant-Prokaryote   | lojap             | Inorganic pyr   | 0,043628559 | 0,692585328 | 21,5257732  | 2,27774736  | 11,72761203 | 2,78448002  | 0,237429411 |
| B <sup>-C</sup> | Clustering-ba  | NULL               | D_replication_cl  | D recombitio    | 0,038686747 | 0,668737836 | 27,22758138 | 26,08951804 | 3,492425613 | 2,783664262 | 0,797057567 |
| B <sup>-C</sup> | Amino Acids a  | Aromatic amino a   | Phenylalanine_e   | Biosynthetic A  | 0,023017884 | 0,528302042 | 26,83026585 | 25,49910776 | 1,881283957 | 2,748064779 | 1,460738964 |
| B <sup>-C</sup> | Carbohydrate   | CO2 fixation       | CO2_uptake,_c     | carboxysome     | 0,027724939 | 0,578040847 | 27,08860759 | 25,68897005 | 1,766215036 | 2,700926655 | 1,529217337 |
| B <sup>-C</sup> | Amino Acids a  | Lysine, threonine, | Methionine_Bios   | Cystathionine   | 0,018513108 | 0,513647922 | 27,03563941 | 26,02652421 | 8,048202621 | 2,674603044 | 0,332323025 |
| B <sup>-C</sup> | Clustering-ba  | Cytochrome bioge   | CBSS-196164.1     | ABC-type mu     | 0,029115878 | 0,590344367 | 22,23167735 | 2,41198186  | 3,673320611 | 2,663283852 | 0,725034413 |
| B <sup>-C</sup> | Membrane Tr    | Protein secretion  | General_Secret    | General secre   | 0,021084237 | 0,521629502 | 26,14452214 | 0,678178602 | 3,405342353 | 2,663207897 | 0,782067593 |
| B <sup>-C</sup> | Nucleosides a  | Purines            | Purine_conversi   | Adenine deam    | 0,023748505 | 0,539419342 | 26,98333333 | 0,041441773 | 4,906678146 | 2,651221972 | 0,540329301 |
| B <sup>-C</sup> | Nitrogen Meta  | NULL               | Nitric_oxide_syr  | putative cytoc  | 0,008551733 | 0,412431688 | 22,32313081 | 3,424086799 | 4,053834626 | 2,616334591 | 0,645397465 |
| B <sup>-C</sup> | Cofactors, Vit | D and DP           | D_and_DP_cofa     | Kynurenine 3-   | 0,012935122 | 0,459522057 | 20,05387205 | 3,449824999 | 2,319226838 | 2,604730004 | 1,123102735 |
| B <sup>-C</sup> | Cofactors, Vit | Folate and pterine | Molybdenum_cc     | Molybdopterin   | 0,044138985 | 0,692585328 | 27,14225053 | 26,184257   | 3,061630493 | 2,588042216 | 0,845315012 |
| B <sup>-C</sup> | Membrane Tr    | ABC transporters   | Periplasmic-Bin   | Alpha-glucosi   | 0,004638888 | 0,301583391 | 23,37722725 | 21,47348109 | 2,940793339 | 2,565420035 | 0,872356449 |
| B <sup>-C</sup> | Carbohydrate   | NULL               | Sugar_utilizatio  | Glycerol-3-ph   | 0,047372259 | 0,707797287 | 26,93167702 | 24,61444879 | 5,189854388 | 2,477230854 | 0,477321842 |
| B <sup>-C</sup> | Miscellaneous  | Plant-Prokaryote   | COG0398           | COG0398: ur     | 0,02957203  | 0,592997022 | 26,03050109 | 25,80645956 | 2,252525069 | 2,474534015 | 1,098560033 |
| B <sup>-C</sup> | Photosynthes   | Electron transport | Photosystem_II    | Putative phot   | 0,000683335 | 0,173567154 | 22,84957098 | 20,85193504 | 3,525070279 | 2,457761442 | 0,697223388 |
| B <sup>-C</sup> | R Metabolism   | R processing and   | Polyadenylation   | Poly(A) polym   | 0,001753903 | 0,248238716 | 25,3935187  | 0,469943632 | 2,070489713 | 2,355204334 | 1,137510763 |
| B <sup>-C</sup> | Cofactors, Vit | Coenzyme A         | Coenzyme_A_B      | Pantothete ki   | 0,043255634 | 0,692585328 | 24,02547771 | 5,730343049 | 1,834310783 | 2,336508919 | 1,273780289 |
| B <sup>-C</sup> | Carbohydrate   | Monosaccharides    | Fructose_utiliza  | Fructose ABC    | 0,051317342 | 0,754548259 | 23,8055197  | 3,440459882 | 1,496031742 | 2,304169961 | 1,540187883 |
| B <sup>-C</sup> | Carbohydrate   | Monosaccharides    | L-fucose_utiliza  | 2-keto-3-deox   | 0,009155019 | 0,430624976 | 26,02298851 | 23,15506336 | 1,992092862 | 2,300053594 | 1,154591554 |
| B <sup>-C</sup> | Cell Wall and  | Gram-Negative ce   | Lipopolysacchar   | Inner membra    | 0,04257014  | 0,692585328 | 26,26950355 | 1,384060798 | 2,879584865 | 2,291826555 | 0,795887832 |
| B <sup>-C</sup> | Motility and C | Flagellar motility | Flagellar_motilit | R polymerase    | 0,015247872 | 0,49653328  | 27,1965812  | 26,16836023 | 1,506839345 | 2,19387714  | 1,45594628  |
| B <sup>-C</sup> | Amino Acids a  | Aromatic amino a   | Phenylalanine_e   | Prephete deh    | 0,045495814 | 0,704630292 | 24,45406098 | 2,453278286 | 3,075605863 | 2,128353068 | 0,692010993 |
| B <sup>-C</sup> | Photosynthes   | Light-harvesting c | Bacterial_light-h | Protein PufQ,   | 0,009888087 | 0,438065262 | 27,59731544 | 24,93986171 | 1,683432322 | 2,1129543   | 1,255146567 |
| B <sup>-C</sup> | Nitrogen Meta  | NULL               | Nitrate_and_nitr  | Respiratory ni  | 0,034606634 | 0,661040019 | 25,0647482  | 1,081805437 | 2,08241931  | 2,068717478 | 0,993420234 |
| B <sup>-C</sup> | Membrane Tr    | Uni- Sym- and An   | Proton-depende    | Di/tripeptide p | 0,009781412 | 0,438065262 | 23,13744227 | 2,970176462 | 3,446503344 | 2,047142149 | 0,593976545 |
| B <sup>-C</sup> | Stress Respon  | Oxidative stress   | Regulation_of_C   | Superoxide di   | 0,01251757  | 0,459522057 | 21,16285234 | 12,91586536 | 2,564326755 | 2,017369897 | 0,786705475 |
| B <sup>-C</sup> | Amino Acids a  | Glutamine, glutan  | Glutamine,_Glu    | Aspartate am    | 0           | 0           | 25,0647482  | 1,4663E-05  | 3,07277126  | 2,00977803  | 0,65406041  |
| B <sup>-C</sup> | Cofactors, Vit | Folate and pterine | Molybdenum_cc     | Molybdenum      | 0,036984308 | 0,668737836 | 23,10349189 | 1,671666738 | 2,104779219 | 2,009003613 | 0,954496127 |
| B <sup>-C</sup> | Carbohydrate   | Di- and oligosaccl | Maltose_and_M     | Putative sucro  | 0,009056542 | 0,430624976 | 26,02298851 | 23,50421433 | 2,294960036 | 1,965756314 | 0,856553614 |
| B <sup>-C</sup> | Nucleosides a  | NULL               | Hydantoin_metal   | N-methylhyda    | 0,051491482 | 0,754548259 | 23,63636364 | 16,72846923 | 1,519309071 | 1,903319189 | 1,252753126 |
| B <sup>-C</sup> | Carbohydrate   | Di- and oligosaccl | Beta-Glucoside    | Beta-glucase    | 0,041857429 | 0,692585328 | 21,40463458 | 2,486079473 | 5,477843961 | 1,899848496 | 0,346824136 |
| B <sup>-C</sup> | Miscellaneous  | Plant-Prokaryote   | Iron-sulfur_clust | Thiamin biosy   | 0,001627668 | 0,248238716 | 22,81579943 | 5,619805207 | 1,651531843 | 1,896393191 | 1,148263171 |

|                 |                |                    |                   |                         |             |             |             |             |             |             |             |
|-----------------|----------------|--------------------|-------------------|-------------------------|-------------|-------------|-------------|-------------|-------------|-------------|-------------|
| B <sup>-C</sup> | Miscellaneous  | Plant-Prokaryote   | COG3760           | FIG000875: T            | 0,027679971 | 0,578040847 | 27,30735931 | 25,81122437 | 1,809453828 | 1,86369852  | 1,029978489 |
| B <sup>-C</sup> | Stress Respo   | Osmotic stress     | Ectoine_biosynt   | L-2,4-diamino           | 0,017147839 | 0,513647922 | 24,85680513 | 1,08488529  | 2,232654333 | 1,850389675 | 0,828784666 |
| B <sup>-C</sup> | Protein Metab  | Protein degradati  | Metallocoarboxyp  | Muramoyltetra           | 0,004264989 | 0,301583391 | 26,66666667 | 25,43741693 | 1,342171122 | 1,755732135 | 1,30812838  |
| B <sup>-C</sup> | Regulation an  | Programmed Cell    | Toxin-antitoxin   | YefM protein            | 0,004264989 | 0,301583391 | 26,66666667 | 25,43741693 | 2,342171122 | 1,755732135 | 0,749617361 |
| B <sup>-C</sup> | Fatty Acids, L | Fatty acids        | Fatty_acid_mets   | Long-chain-ac           | 0,006349166 | 0,356793046 | 27,36383442 | 25,84275318 | 1,245414961 | 1,714723907 | 1,376829379 |
| B <sup>-C</sup> | Cofactors, Vit | Folate and pterine | Folate_Biosynth   | Folypolygluta           | 0,032690868 | 0,645348216 | 23,42238505 | 7,579859105 | 2,531161185 | 1,696172462 | 0,670116337 |
| B <sup>-C</sup> | Carbohydrate   | Organic acids      | Methylcitrate_cy  | Propiote--CoA           | 0,02263177  | 0,528302042 | 23,9245283  | 7,89606265  | 7,258552392 | 1,682528148 | 0,231799408 |
| B <sup>-C</sup> | Miscellaneous  | Plant-Prokaryote   | COG0523           | Zinc ABC tran           | 0,003980785 | 0,301583391 | 26,44748858 | 0,434348019 | 1,341912952 | 1,638841034 | 1,221272238 |
| B <sup>-C</sup> | R Metabolism   | R processing and   | R_pseudouridin    | Ribosomal lar           | 0,044183669 | 0,692585328 | 26,66666667 | 25,43741693 | 1,063416697 | 1,614301494 | 1,518032864 |
| B <sup>-C</sup> | Metabolism of  | Metabolism of cer  | Protocatechuate   | 3-oxoadipate            | 0,046852964 | 0,706649202 | 27,65765766 | 27,31115441 | 1,267151123 | 1,55423563  | 1,226559012 |
| B <sup>-C</sup> | Potassium me   | NULL               | Potassium_hom     | Voltage-gatec           | 0,021542197 | 0,52744133  | 20,79722717 | 2,545174452 | 2,815372332 | 1,532290787 | 0,544258665 |
| B <sup>-C</sup> | Clustering-ba  | NULL               | CBSS-296591.1     | UDP-glucurot            | 0,029427632 | 0,592997022 | 23,9245283  | 3,591697969 | 1,299343916 | 1,494491683 | 1,150189465 |
| B <sup>-C</sup> | Clustering-ba  | NULL               | CBSS-296591.1     | Nucleotide su           | 0,038441638 | 0,668737836 | 25,49693252 | 11,34353579 | 2,705892554 | 1,486548761 | 0,549374645 |
| B <sup>-C</sup> | Nucleosides a  | Purines            | Purine_convers    | GMP reducta             | 0,038441638 | 0,668737836 | 25,49693252 | 24,1769175  | 1,29379801  | 1,485223148 | 1,147959569 |
| B <sup>-C</sup> | Miscellaneous  | Plant-Prokaryote   | lojap             | Nicotite-nucle          | 0,011975446 | 0,451747005 | 23,75318489 | 2,549728838 | 1,822944114 | 1,466205897 | 0,804306553 |
| B <sup>-C</sup> | Miscellaneous  | NULL               | YbbK              | Putative stom           | 0,043826045 | 0,692585328 | 25,19708029 | 0,007000246 | 1,570595542 | 1,421234605 | 0,904901718 |
| B <sup>-C</sup> | Carbohydrate   | Glycoside hydroly  | Predicted_carbo   | COG1649 pre             | 0,043629935 | 0,692585328 | 24,81118881 | 23,67372781 | 1,698528637 | 1,394792347 | 0,821176821 |
| B <sup>-C</sup> | Amino Acids a  | Lysine, threonine, | Threonine_and     | Homoserine k            | 0,018173742 | 0,513647922 | 25,09706848 | 10,08999663 | 1,273513548 | 1,391294944 | 1,09248539  |
| B <sup>-C</sup> | Cell Wall and  | Capsular and extr  | Rhamnose_con      | capsular poly           | 0,005726368 | 0,340897864 | 23,60468769 | 22,71438761 | 1,793756671 | 1,384734399 | 0,771974494 |
| B <sup>-C</sup> | R Metabolism   | R processing and   | tRmodification_   | tR (uridine-5- <i>c</i> | 0,003739138 | 0,301583391 | 22,88368539 | 3,488128336 | 1,116338114 | 1,381283589 | 1,237334435 |
| B <sup>-C</sup> | Amino Acids a  | Arginine; urea cyc | Arginine_Biosyn   | Glutamate N-            | 0,019403667 | 0,513968466 | 26,93167702 | 25,71829592 | 2,518108778 | 1,353154756 | 0,537369461 |
| B <sup>-C</sup> | Secondary Me   | Biosynthesis of ph | Flavanone_bios    | Chalcone syn            | 0,003734473 | 0,301583391 | 22,95296388 | 21,31690783 | 1,091094891 | 1,340502029 | 1,228584278 |
| B <sup>-C</sup> | Cell Wall and  | NULL               | Recycling_of_P    | AmpG perme              | 0,018513108 | 0,513647922 | 27,03563941 | 26,02652421 | 1,524101311 | 1,337301522 | 0,877436108 |
| B <sup>-C</sup> | Membrane Tr    | NULL               | Transport_of_Zi   | Zinc ABC tran           | 0,018513108 | 0,513647922 | 27,03563941 | 26,02652421 | 1,524101311 | 1,337301522 | 0,877436108 |
| B <sup>-C</sup> | Miscellaneous  | NULL               | ZZ_gjo_need_h     | +H+ antiporte           | 0,038528248 | 0,668737836 | 22,6152026  | 3,942323512 | 1,147404246 | 1,212363246 | 1,056613875 |
| B <sup>-C</sup> | Motility and C | Flagellar motility | Flagellum         | Flagellar bios          | 0,019965179 | 0,513968466 | 25,0647482  | 25,01429123 | 0,873844449 | 1,18874455  | 1,18874455  |
| B <sup>-C</sup> | R Metabolism   | R processing and   | R_methylation     | Ribosomal R             | 0,019965179 | 0,513968466 | 25,0647482  | 25,01429123 | 0,873844449 | 1,18874455  | 1,18874455  |
| B <sup>-C</sup> | Cell Wall and  | NULL               | YjeE              | YjeF protein,           | 0,03657362  | 0,668737836 | 24,02547771 | 20,8132096  | 1,45893206  | 1,182381805 | 0,810443363 |
| B <sup>-C</sup> | Amino Acids a  | Lysine, threonine, | Cysteine_Biosyr   | Sulfate perme           | 0,038528248 | 0,668737836 | 22,6152026  | 14,73117638 | 0,872108019 | 1,180661579 | 1,180661579 |
| B <sup>-C</sup> | Nucleosides a  | Pyrimidines        | Pyrimidine_utiliz | Uracil permea           | 0,019965179 | 0,513968466 | 25,0647482  | 24,87812515 | 0,876160122 | 1,162784665 | 1,162784665 |
| B <sup>-C</sup> | Sulfur Metabo  | Organic sulfur ass | Utilization_of_gl | Putative gluta          | 0,025145136 | 0,555139763 | 21,34249625 | 1,145177248 | 1,038886134 | 1,157097973 | 1,113787098 |
| B <sup>-C</sup> | Carbohydrate   | Central carbohyd   | Dihydroxyaceto    | Phosphoenolp            | 0,019965179 | 0,513968466 | 25,0647482  | 12,67330953 | 1,121538845 | 1,153284108 | 1,028305094 |
| B <sup>-C</sup> | Amino Acids a  | Histidine Metabol  | Histidine_Biosyr  | Histidinol-pho          | 0,011901789 | 0,451747005 | 26,66666667 | 25,43741693 | 0,801862606 | 1,123344543 | 1,123344543 |
| B <sup>-C</sup> | Membrane Tr    | Protein translocat | Twin-arginine_tr  | Deoxyribonuc            | 0,011901789 | 0,451747005 | 26,66666667 | 25,43741693 | 0,801862606 | 1,123344543 | 1,123344543 |
| B <sup>-C</sup> | Nucleosides a  | Pyrimidines        | De_Novo_Pyrim     | Carbamoyl-ph            | 0,011901789 | 0,451747005 | 26,66666667 | 25,43741693 | 0,801862606 | 1,123344543 | 1,123344543 |
| B <sup>-C</sup> | Nucleosides a  | Pyrimidines        | pyrimidine_conv   | Pyrimidine-nu           | 0,011901789 | 0,451747005 | 26,66666667 | 25,43741693 | 0,801862606 | 1,123344543 | 1,123344543 |
| B <sup>-C</sup> | Virulence, Dis | Resistance to ant  | Copper_homeos     | Multicopper o           | 0,011901789 | 0,451747005 | 26,66666667 | 25,43741693 | 2,801862606 | 1,123344543 | 0,400927776 |
| B <sup>-C</sup> | Clustering-ba  | NULL               | EC49-61           | Bis(5'-nucleos          | 0,038528248 | 0,668737836 | 22,6152026  | 10,03227627 | 0,887870083 | 1,103104584 | 1,103104584 |
| B <sup>-C</sup> | Respiration    | Electron doting re | H2:CoM-S-S-HT     | CoB--CoM-re             | 0,035047266 | 0,661040019 | 25,65       | 0,841756934 | 0,920302128 | 1,007595981 | 1,007595981 |
| B <sup>-C</sup> | Membrane Tr    | NULL               | Ton_and_Tol_tr    | TPR domain              | 0,041857429 | 0,692585328 | 21,40463458 | 12,79087264 | 0,771539961 | 0,967920827 | 0,967920827 |
| B <sup>-C</sup> | Membrane Tr    | NULL               | Ton_and_Tol_tr    | ToIA protein            | 0,041857429 | 0,692585328 | 21,40463458 | 12,79087264 | 0,771539961 | 0,967920827 | 0,967920827 |
| B <sup>-C</sup> | Nitrogen Meta  | NULL               | Ammonia_assin     | Ammonium tr             | 0,035047266 | 0,661040019 | 25,65       | 23,97942515 | 0,918437194 | 0,967085397 | 0,967085397 |
| B <sup>-C</sup> | Carbohydrate   | Central carbohyd   | Entner-Doudoro    | Glucose 1-de            | 0,044296305 | 0,692585328 | 23,02440976 | 4,984877998 | 0,660958238 | 0,916070379 | 0,916070379 |



|                 |                |                      |                  |                  |             |             |             |             |             |             |             |
|-----------------|----------------|----------------------|------------------|------------------|-------------|-------------|-------------|-------------|-------------|-------------|-------------|
| B <sup>-C</sup> | Fatty Acids, L | Phospholipids        | Glycerolipid_and | Diacylglycerol   | 0,044296305 | 0,692585328 | 23,02440976 | 4,984877998 | 0,660958238 | 0,916070379 | 0,916070379 |
| B <sup>-C</sup> | Regulation an  | Programmed Cell      | Phd-Doc,_YdcE    | FIG022160: h     | 0,053546595 | 0,77277473  | 24,71784663 | 11,77735221 | 0,814156785 | 0,841264413 | 0,841264413 |
| B <sup>-C</sup> | Clustering-ba  | NULL                 | CBSS-393124.3    | ADA regulato     | 0,044296305 | 0,692585328 | 23,02440976 | 20,493828   | 0,616003972 | 0,836942815 | 0,836942815 |
| B <sup>-C</sup> | Respiration    | NULL                 | Quinone_oxidor   | Putative Zn-d    | 0,044296305 | 0,692585328 | 23,02440976 | 20,493828   | 0,616003972 | 0,836942815 | 0,836942815 |
| B <sup>-C</sup> | Clustering-ba  | NULL                 | Conserved_gen    | tR:m(5)U-54 M    | 0,053546595 | 0,77277473  | 24,71784663 | 24,56735959 | 6,187448976 | 0,827574296 | 0,133750484 |
| B <sup>-C</sup> | Carbohydrate   | Monosaccharides      | L-Arabinose_uti  | L-arabote def    | 0,047109947 | 0,706649202 | 22,79569892 | 12,15643455 | 0,542676395 | 0,637053407 | 0,637053407 |
| B <sup>-C</sup> | Clustering-ba  | Lysine Biosynthes    | A_Glutathione-c  | FIG138056: a     | 0,047109947 | 0,706649202 | 22,79569892 | 12,15643455 | 0,542676395 | 0,637053407 | 0,637053407 |
| B <sup>-C</sup> | Metabolism of  | NULL                 | Phenylacetyl-Cc  | Phenylacetate    | 0,047109947 | 0,706649202 | 22,79569892 | 12,15643455 | 0,542676395 | 0,637053407 | 0,637053407 |
| B <sup>-C</sup> | Cofactors, Vit | Tetrapyrroles        | Coenzyme_B12     | Alpha-ribazole   | 0,047109947 | 0,706649202 | 22,79569892 | 22,67511649 | 0,460001231 | 0,634065291 | 0,634065291 |
| B <sup>-C</sup> | Respiration    | Electron doting re   | Succite_dehydro  | Succite dehyd    | 0,047109947 | 0,706649202 | 22,79569892 | 22,67511649 | 0,460001231 | 0,634065291 | 0,634065291 |
| Bs              | Clustering-ba  | NULL                 | KH_domain_R      | SSU ribosoma     | 7,05545E-05 | 0,101175174 | 25,0647482  | 0,737283248 | 24,69057643 | 12,89627349 | 0,52231561  |
| Bs              | Cofactors, Vit | Riboflavin, FMN,     | riboflavin_to_FA | 3,4-dihydroxy    | 0,000345947 | 0,172700325 | 21,38739956 | 3,296011689 | 4,786260308 | 4,424801531 | 0,924479917 |
| Bs              | Secondary Me   | Plant Hormones       | Auxin_biosynthe  | Tryptophan sy    | 0,000622307 | 0,172700325 | 25,21314455 | 25,20473787 | 1,575083326 | 1,384091719 | 0,878741903 |
| Bs              | Protein Metab  | Protein biosynthe    | Ribosome_SSU     | SSU ribosoma     | 0,000639909 | 0,172700325 | 27,90740741 | 27,51141572 | 33,04997814 | 28,90714126 | 0,874649331 |
| Bs              | Protein Metab  | Protein biosynthe    | Ribosome_LSU     | LSU ribosoma     | 0,000710174 | 0,172700325 | 20,76131261 | 3,247187026 | 38,35947108 | 13,42552681 | 0,34999249  |
| Bs              | Protein Metab  | Protein biosynthe    | Ribosome_LSU     | LSU ribosoma     | 0,000722596 | 0,172700325 | 21,73270875 | 1,965372211 | 32,45746329 | 15,58551159 | 0,480182676 |
| Bs              | Clustering-ba  | Ribosome-related     | A_Gammaprote     | 2-Keto-3-deox    | 0,001327644 | 0,247795345 | 24,90423409 | 24,77527396 | 7,640456889 | 4,481177011 | 0,586506419 |
| Bs              | Amino Acids &  | Lysine, threonine,   | Methionine_Bio   | Adenosylhom      | 0,001725616 | 0,247795345 | 25,37473805 | 0,797593818 | 81,08166394 | 32,57920597 | 0,401807319 |
| Bs              | Carbohydrate   | Central carbohyd     | Glyoxylate_bye   | Citrate syntha   | 0,001742066 | 0,247795345 | 23,4593697  | 1,860903991 | 49,45759531 | 14,51790613 | 0,293542499 |
| Bs              | Carbohydrate   | Fermentation         | Acetone_Butano   | 3-hydroxybuty    | 0,001812376 | 0,247795345 | 26,26960355 | 0,049469065 | 8,455470131 | 6,560421218 | 0,775878942 |
| Bs              | Protein Metab  | Protein degradati    | Aminoamidase     | Cytosol aminc    | 0,001900801 | 0,247795345 | 25,17616445 | 13,93948134 | 0,962766232 | 1,158546785 | 1,158546785 |
| Bs              | Protein Metab  | Protein biosynthe    | tR_aminoacylati  | Lysyl-tR synth   | 0,002476619 | 0,288668396 | 22,66767715 | 22,66237422 | 9,577655899 | 4,736901071 | 0,494578331 |
| Bs              | Amino Acids &  | Alanine, serine, a   | Glycine_and_Se   | Glycine dehyd    | 0,002785472 | 0,288668396 | 21,12696193 | 3,195146696 | 8,056400288 | 5,76575842  | 0,715674273 |
| Bs              | Protein Metab  | Protein biosynthe    | tR_aminoacylati  | Threonyl-tR s    | 0,002844303 | 0,288668396 | 26,98333333 | 0,063105508 | 23,86428988 | 16,06134785 | 0,673028527 |
| Bs              | Cofactors, Vit | Riboflavin, FMN,     | Riboflavin,_FMN  | GTP cyclohyd     | 0,003019544 | 0,288668396 | 23,42238505 | 3,127135176 | 7,734325047 | 5,956204357 | 0,770100083 |
| Bs              | Amino Acids &  | Lysine, threonine,   | Methionine_Bio   | O-acetylhomc     | 0,00344172  | 0,308464175 | 23,92153923 | 3,030118735 | 8,392717287 | 5,908178471 | 0,70396491  |
| Bs              | Protein Metab  | Protein biosynthe    | Ribosome_LSU     | LSU ribosoma     | 0,004220308 | 0,333792807 | 27,1965812  | 26,29025566 | 14,06822482 | 12,29046995 | 0,873633319 |
| Bs              | Clustering-ba  | NULL                 | CTP_synthase     | Inner membra     | 0,004527247 | 0,333792807 | 27,2516129  | 24,79542557 | 5,191277953 | 3,477096107 | 0,669795788 |
| Bs              | Carbohydrate   | Di- and oligosacc    | Fructooligosacc  | Beta-glucosid    | 0,004562451 | 0,333792807 | 27,4790287  | 27,22184519 | 3,798512407 | 3,22789057  | 0,849777551 |
| Bs              | Carbohydrate   | Polysaccharides      | Cellulosome      | 1,4-alpha-gluc   | 0,004845266 | 0,333792807 | 25,3979798  | 0,880985061 | 17,56089937 | 11,48445019 | 0,653978475 |
| Bs              | Protein Metab  | Protein biosynthe    | Ribosome_SSU     | SSU ribosoma     | 0,005166308 | 0,333792807 | 27,11535986 | 0,063282542 | 13,69078487 | 10,16572369 | 0,742523076 |
| Bs              | Amino Acids &  | Lysine, threonine,   | Lysine_fermenta  | Electron trans   | 0,00528175  | 0,333792807 | 22,61129547 | 3,863759116 | 12,57469737 | 6,059729311 | 0,48189862  |
| Bs              | Clustering-ba  | NULL                 | Aerotolerance_c  | MoxR-like AT     | 0,005525073 | 0,333792807 | 22,23167735 | 3,637799414 | 15,77150195 | 5,786500822 | 0,36689599  |
| Bs              | D Metabolism   | D replication        | D-replication    | Chromosoma       | 0,00558649  | 0,333792807 | 26,83026585 | 26,26601806 | 18,3605916  | 11,72403984 | 0,638543686 |
| Bs              | Fatty Acids, L | Isoprenoids          | polyprenyl_synt  | 1-deoxy-D-xy     | 0,006740132 | 0,386613994 | 26,1169024  | 0,087028707 | 2,381342756 | 2,849511867 | 1,196598793 |
| Bs              | D Metabolism   | D repair             | D_repair,_bacte  | D repair prote   | 0,007394118 | 0,396165345 | 26,88065844 | 26,19407526 | 5,324788424 | 6,058128958 | 1,137722004 |
| Bs              | Clustering-ba  | Molybdopterin oxi    | CBSS-269799.3    | Molybdopterin    | 0,00745918  | 0,396165345 | 26,19013847 | 25,42391065 | 7,993069509 | 4,403819821 | 0,550954776 |
| Bs              | Clustering-ba  | Ribosomal Protein    | A_Gram-positiv   | LSU ribosoma     | 0,007918858 | 0,405558661 | 26,02298851 | 1,30335414  | 7,306991825 | 4,288253252 | 0,586869858 |
| Bs              | Nitrogen Metab | NULL                 | Ammoniaassin     | Ammonium tr      | 0,008597634 | 0,406361077 | 24,02547771 | 3,138744673 | 9,253006396 | 6,26298292  | 0,676859245 |
| Bs              | Protein Metab  | Protein biosynthe    | Translation_elor | Translation el   | 0,008828322 | 0,406361077 | 26,39808153 | 1,176199921 | 134,1678597 | 71,09918688 | 0,529927115 |
| Bs              | R Metabolism   | R processing and     | ATP-dependent    | ATP-depende      | 0,008996487 | 0,406361077 | 27,42105263 | 27,19419425 | 6,293297316 | 6,704070425 | 1,065271524 |
| Bs              | Carbohydrate   | Central carbohyd     | TCA_Cycle        | Fumarate hyc     | 0,009716279 | 0,406361077 | 26,64423476 | 25,94218581 | 9,50559802  | 7,099751927 | 0,746902185 |
| Bs              | Protein Metab  | Protein biosynthe    | Ribosome_SSU     | SSU ribosoma     | 0,009944728 | 0,406361077 | 22,88368539 | 5,449594826 | 14,06789714 | 9,034018724 | 0,642172646 |
| Bs              | Stress Respon  | Heat shock           | Heat_shock_dK    | Translation el   | 0,00997352  | 0,406361077 | 26,88065844 | 26,19792936 | 20,10408238 | 11,48109437 | 0,571082736 |
| Bs              | Motility and C | Flagellar motility i | Flagellum        | R polymerase     | 0,010518581 | 0,406361077 | 27,14225053 | 26,08222911 | 122,6392524 | 56,8353041  | 0,463434854 |
| Bs              | Clustering-ba  | Carbohydrates        | Cluster_Ytf_and  | Fructose-1,6-    | 0,01112266  | 0,406361077 | 20,05387205 | 1,512374831 | 3,763541903 | 3,53745459  | 0,939926984 |
| Bs              | Clustering-ba  | Ribosomal Protein    | A_Gram-positiv   | ATP-depende      | 0,011262472 | 0,406361077 | 25,33434382 | 1,518261798 | 2,779159353 | 2,646053475 | 0,952105705 |
| Bs              | Dormancy an    | NULL                 | Persistor_Cells  | Cell division in | 0,011393344 | 0,406361077 | 25,22360116 | 13,48200588 | 3,346902862 | 3,6707013   | 1,096745693 |

|    |               |                    |                   |                |             |             |             |             |             |              |             |
|----|---------------|--------------------|-------------------|----------------|-------------|-------------|-------------|-------------|-------------|--------------|-------------|
| Bs | Clustering-ba | NULL               | CBSS-350688.3     | Polyribonucle  | 0,01142176  | 0,406361077 | 25,10987517 | 2,620950537 | 57,79590862 | 31,80962995  | 0,550378577 |
| Bs | Amino Acids   | Aromatic amino a   | Phenylalanine_    | Biosynthetic A | 0,011901789 | 0,406361077 | 26,66666667 | 25,43741693 | 0,801862606 | 1,123344543  | 1,123344543 |
| Bs | Protein Metab | Protein degradati  | Metallocoarboxyp  | Muramoyltetra  | 0,011901789 | 0,406361077 | 26,66666667 | 25,43741693 | 0,801862606 | 1,123344543  | 1,123344543 |
| Bs | Respiration   | Electron doting re | Respiratory_Co    | DH-ubiquinon   | 0,011901789 | 0,406361077 | 26,66666667 | 25,43741693 | 0,801862606 | 1,123344543  | 1,123344543 |
| Bs | Stress Respo  | Oxidative stress   | Regulation_of_C   | Superoxide di  | 0,01251757  | 0,415046136 | 21,16285234 | 12,91586536 | 2,564326755 | 2,017369897  | 0,786705475 |
| Bs | Stress Respo  | Cold shock         | Cold_shock,_Cs    | Cold shock pr  | 0,012735028 | 0,415046136 | 27,97202797 | 26,69123739 | 136,5063664 | 63,75695332  | 0,467062123 |
| Bs | D Metabolism  | D uptake, compet   | D_processing_c    | D polymerase   | 0,013871803 | 0,435851891 | 26,7804878  | 25,44161117 | 9,505179613 | 4,642977226  | 0,488468121 |
| Bs | Carbohydrate  | Central carbohyd   | Pyruvate_metab    | DP-depender    | 0,013981302 | 0,435851891 | 25,97402597 | 0,698300179 | 8,733657661 | 5,982393306  | 0,684981429 |
| Bs | Stress Respo  | Heat shock         | Heat_shock_dK     | Ribosomal pr   | 0,014935244 | 0,455530188 | 26,39808153 | 23,53424718 | 1,883186569 | 2,143594138  | 1,138280282 |
| Bs | Amino Acids   | Histidine Metaboli | Histidine_Biosy   | Imidazole gly  | 0,015247872 | 0,455530188 | 27,1965812  | 26,16836023 | 1,506839345 | 2,19387714   | 1,45594628  |
| Bs | Clustering-ba | NULL               | CBSS-269801.1     | Phosphopant    | 0,015684219 | 0,459003464 | 27,1965812  | 26,13579139 | 3,425761086 | 4,943043914  | 1,442903866 |
| Bs | Carbohydrate  | Sugar alcohols     | Glycerol_and_G    | Glycerol uptak | 0,016015948 | 0,4593374   | 27,03877418 | 9,73695899  | 1,775421574 | 1,988875247  | 1,120790282 |
| Bs | Miscellaneous | Plant-Prokaryote   | Competence_or     | RecA protein   | 0,016963187 | 0,466131348 | 27,36383442 | 0,719106975 | 19,5328479  | 9,056735032  | 0,4636669   |
| Bs | Metabolism of | Metabolism of cel  | N-heterocyclic_   | Isoquinoline 1 | 0,017298607 | 0,466131348 | 21,06980334 | 3,122529816 | 3,765507967 | 1,96198403   | 0,521040998 |
| Bs | Protein Metab | Protein biosynthe  | Ribosome_LSU      | LSU ribosoma   | 0,017490479 | 0,466131348 | 25,94362343 | 25,51388535 | 56,39067579 | 21,47004364  | 0,380737477 |
| Bs | Clustering-ba | NULL               | CBSS-176280.1     | Monofunctio    | 0,017758515 | 0,466131348 | 23,80812538 | 1,854790486 | 5,963203752 | 3,492503499  | 0,585675695 |
| Bs | D Metabolism  | D replication      | D-replication     | Replicative D  | 0,01787812  | 0,466131348 | 26,83026585 | 26,32841137 | 7,083445126 | 4,79040991   | 0,67628249  |
| Bs | Stress Respo  | Cold shock         | Cold_shock,_Cs    | Cold shock pr  | 0,019673312 | 0,4703942   | 27,14225053 | 0,095612566 | 76,63123137 | 36,87190418  | 0,481160273 |
| Bs | Clustering-ba | NULL               | CBSS-176279.3     | LSU ribosoma   | 0,019764326 | 0,4703942   | 25,67770419 | 2,180407308 | 22,67438878 | 11,97541938  | 0,528147396 |
| Bs | Carbohydrate  | Di- and oligosaccl | Beta-Glucoside_   | Periplasmic b  | 0,019965179 | 0,4703942   | 25,0647482  | 24,87812515 | 0,876160122 | 1,162784665  | 1,162784665 |
| Bs | Protein Metab | Protein folding    | Peptidyl-prolyl_  | FKBP-type pe   | 0,019965179 | 0,4703942   | 25,0647482  | 25,01429123 | 0,87384449  | 1,18874455   | 1,18874455  |
| Bs | Nucleosides   | Purines            | De_Novo_Purin     | Phosphoribos   | 0,019970876 | 0,4703942   | 24,12903226 | 4,932183879 | 7,167667286 | 7,063381213  | 0,985450486 |
| Bs | Protein Metab | Protein processin  | Ribosomal_prot    | SSU ribosoma   | 0,020009795 | 0,4703942   | 24,02547771 | 3,577002568 | 16,54087202 | 7,174496466  | 0,433743545 |
| Bs | Amino Acids   | Alanine, serine, a | Glycine_and_Se    | 2-amino-3-ke   | 0,021413743 | 0,495279146 | 23,73006135 | 3,690636903 | 26,43218211 | 6,368098599  | 0,240922167 |
| Bs | Clustering-ba | NULL               | CBSS-312309.3     | SSU ribosoma   | 0,022525305 | 0,512718841 | 27,97202797 | 26,80279383 | 36,82940034 | 27,30380898  | 0,741359043 |
| Bs | Protein Metab | Protein biosynthe  | Ribosome_Ssu      | SSU ribosoma   | 0,023261788 | 0,52120944  | 24,34437086 | 3,445935305 | 12,31290207 | 6,956813381  | 0,565001926 |
| Bs | Protein Metab | Protein biosynthe  | Ribosome_LSU      | LSU ribosoma   | 0,023951689 | 0,524346081 | 27,08860759 | 26,23612242 | 26,14733019 | 12,75421406  | 0,487782652 |
| Bs | Protein Metab | Protein biosynthe  | Ribosome_Ssu      | SSU ribosoma   | 0,0242093   | 0,524346081 | 25,97197312 | 1,487548629 | 23,91074629 | 10,72155361  | 0,448398953 |
| Bs | Clustering-ba | NULL               | Conserved_gen     | Helicase PriA  | 0,025145136 | 0,524346081 | 21,34249625 | 2,248868158 | 3,041744955 | 1,185245488  | 0,38965972  |
| Bs | Clustering-ba | NULL               | D_replication_c   | D recombitio   | 0,025145136 | 0,524346081 | 21,34249625 | 2,248868158 | 2,041744955 | 1,185245488  | 0,580506143 |
| Bs | Protein Metab | Protein biosynthe  | Universal_GTP     | Sigl recogniti | 0,025230042 | 0,524346081 | 23,9245283  | 5,50379814  | 13,02916632 | 5,802345525  | 0,445335134 |
| Bs | R Metabolism  | R processing and   | tR_modification   | S-adenosylme   | 0,026361451 | 0,538693747 | 24,77575241 | 2,078005269 | 34,67910725 | 15,4415056   | 0,445268256 |
| Bs | Carbohydrate  | Central carbohyd   | Entner-Doudoro    | 2,3-bisphosph  | 0,026714832 | 0,538693747 | 23,82608696 | 9,153695769 | 11,27444587 | 2,528204898  | 0,224242054 |
| Bs | Phosphorus M  | NULL               | Phosphate_met     | Pyrophosphat   | 0,027047385 | 0,538693747 | 25,78202653 | 25,7007674  | 14,22474617 | 7,918978978  | 0,556704414 |
| Bs | Metabolism of | Aerobic degradati  | Aerobic_benzo     | Glutaryl-CoA   | 0,027591812 | 0,542009022 | 27,71882086 | 25,0766188  | 15,91437997 | 8,369836926  | 0,525929187 |
| Bs | Clustering-ba | NULL               | CBSS-251221.1     | Phosphoribos   | 0,029903453 | 0,579480423 | 27,4790287  | 27,00067791 | 5,216581806 | 3,744140897  | 0,717738365 |
| Bs | R Metabolism  | R processing and   | tR_modification   | FIG137478: H   | 0,031508428 | 0,591414453 | 27,14225053 | 26,86440496 | 19,19346463 | 12,47655482  | 0,650041827 |
| Bs | Clustering-ba | NULL               | CBSS-176299.4     | Translation el | 0,031560231 | 0,591414453 | 27,42105263 | 26,49681702 | 31,00894962 | 19,92844554  | 0,642667546 |
| Bs | Clustering-ba | NULL               | CBSS-176299.4     | Ribosome rec   | 0,031839098 | 0,591414453 | 24,50290365 | 1,12169926  | 4,183278435 | 2,070505475  | 0,494948043 |
| Bs | Miscellaneous | Plant-Prokaryote   | COG3146_expe      | Queuosine bi   | 0,032690868 | 0,591414453 | 23,42238505 | 5,127144082 | 1,496705232 | 1,1721858225 | 1,150432422 |
| Bs | Clustering-ba | NULL               | Bacterial_R_met   | Metallo-beta-l | 0,032848395 | 0,591414453 | 22,16865079 | 1,205879126 | 2,638194186 | 2,587948077  | 0,980954355 |
| Bs | Nitrogen Meta | NULL               | Ammonia_assin     | Glutamate sy   | 0,033870668 | 0,591414453 | 23,54491018 | 3,577322113 | 4,588097528 | 2,731302025  | 0,595301649 |
| Bs | Nucleosides   | Purines            | De_Novo_Purin     | Phosphoribos   | 0,034551453 | 0,591414453 | 23,73006135 | 3,533148009 | 7,01774232  | 4,361534348  | 0,621501068 |
| Bs | Nitrogen Meta | NULL               | Ammonia_assin     | Ammonium tr    | 0,035047266 | 0,591414453 | 25,65       | 23,97942515 | 0,918437194 | 0,967085397  | 0,967085397 |
| Bs | Sulfur Metab  | NULL               | Sulfur_oxidation  | Sulfide dehyd  | 0,035047266 | 0,591414453 | 25,65       | 23,97942515 | 2,918437194 | 0,967085397  | 0,331370981 |
| Bs | Membrane Tr   | Protein translocat | Bacterial_sigl_re | Sigl recogniti | 0,035285864 | 0,591414453 | 23,73006135 | 5,021469149 | 10,70481585 | 3,677486628  | 0,343535721 |
| Bs | Protein Metab | Protein biosynthe  | Translation_initi | Translation in | 0,035937435 | 0,591414453 | 26,7804878  | 26,67486097 | 9,275451014 | 3,560105104  | 0,383820161 |
| Bs | Nitrogen Meta | NULL               | Ammonia_assin     | Glutamate sy   | 0,036179192 | 0,591414453 | 22,62292436 | 6,732291519 | 21,33829303 | 9,87499501   | 0,462782801 |
| Bs | Protein Metab | Protein biosynthe  | Ribosome_LSU      | LSU ribosoma   | 0,03654918  | 0,591414453 | 26,98333333 | 0,155292569 | 33,21041447 | 18,56324305  | 0,558958488 |
| Bs | Amino Acids   | Aromatic amino a   | Tryptophan_cat    | Tryptophan 2   | 0,03657362  | 0,591414453 | 24,02547771 | 20,8132096  | 2,45893206  | 1,182381805  | 0,480851759 |

|    |                |                    |                   |                 |             |             |             |             |             |             |             |
|----|----------------|--------------------|-------------------|-----------------|-------------|-------------|-------------|-------------|-------------|-------------|-------------|
| Bs | Membrane Tr    | Uni- Sym- and An   | Proton-depende    | Di/tripeptide p | 0,036984308 | 0,591414453 | 23,10349189 | 1,671666738 | 3,104779219 | 2,009003613 | 0,647068107 |
| Bs | Clustering-ba  | TldD cluster       | CBSS-354.1.pe     | Cytoplasmic a   | 0,038173589 | 0,591414453 | 25,71470334 | 0,69471752  | 47,82390377 | 24,26639045 | 0,507411326 |
| Bs | Cofactors, Vit | Lipoic acid        | Lipoic_acid_me    | Octanoate-[ac   | 0,038441638 | 0,591414453 | 25,49693252 | 24,1769175  | 2,29379801  | 1,485223148 | 0,647495177 |
| Bs | Cofactors, Vit | Coenzyme A         | Coenzyme_A_B      | Pantoate--bet   | 0,038663564 | 0,591414453 | 22,77062572 | 9,280055121 | 1,05312794  | 1,489011954 | 1,413894644 |
| Bs | Nucleosides a  | Pyrimidines        | De_Novo_Pyrim     | Aspartate car   | 0,03897603  | 0,591414453 | 27,2516129  | 27,22846075 | 8,251843932 | 6,850502252 | 0,830178359 |
| Bs | Cofactors, Vit | Pyridoxine         | Pyridoxin_(Vita   | 1-deoxy-D-xy    | 0,03908807  | 0,591414453 | 20,93765687 | 1,29727175  | 13,74347458 | 5,060570683 | 0,368216251 |
| Bs | Virulence, Dis | NULL               | C_jejuni_coloniz  | 4-keto-6-deox   | 0,0394269   | 0,591414453 | 24,23529412 | 2,525577468 | 2,525262988 | 1,806351887 | 0,715312384 |
| Bs | Miscellaneous  | Plant-Prokaryote   | COG0451           | Undecaprenyl    | 0,039592599 | 0,591414453 | 23,4556213  | 3,462330343 | 3,353163081 | 3,437532477 | 1,025161137 |
| Bs | Fatty Acids, L | Fatty acids        | Fatty_Acid_Bios   | Biotin carboxy  | 0,040422033 | 0,597579339 | 26,70310633 | 0,246521907 | 24,56490193 | 12,97596587 | 0,528231943 |
| Bs | D Metabolism   | D repair           | D_repair_bacte    | Single-strand   | 0,041772174 | 0,605905233 | 26,7804878  | 26,01778307 | 8,980370955 | 3,647027347 | 0,406110991 |
| Bs | Cofactors, Vit | Tetrapyrroles      | Heme_and_Sirc     | Glutamyl-tR     | 0,042511159 | 0,605905233 | 26,95235455 | 0,32885505  | 3,448242345 | 3,486392017 | 1,011063512 |
| Bs | Clustering-ba  | NULL               | Cell_division-rib | Transcription-  | 0,043628897 | 0,605905233 | 25,0647482  | 0,071493775 | 3,759645666 | 2,274324761 | 0,604930614 |
| Bs | Carbohydrate   | Central carbohyd   | TCA_Cycle         | Isocitrate deh  | 0,044092251 | 0,605905233 | 26,38548753 | 24,41139655 | 13,50793001 | 2,527186169 | 0,261119666 |
| Bs | Stress Respo   | Heat shock         | Heat_shock_dK     | tmR-binding p   | 0,044138985 | 0,605905233 | 27,14225053 | 25,68441785 | 2,060582211 | 2,595974603 | 1,259825786 |
| Bs | Amino Acids a  | Aromatic amino a   | Tryptophan_syn    | Anthranilate s  | 0,044296305 | 0,605905233 | 23,02440976 | 4,984877998 | 0,660958238 | 0,916070379 | 0,916070379 |
| Bs | Stress Respo   | Oxidative stress   | Oxidative_stress  | Ferroxidase (I  | 0,044646512 | 0,605905233 | 27,32153364 | 25,36489721 | 17,91990417 | 8,909798312 | 0,497201225 |
| Bs | D Metabolism   | D recombination    | RuvABC_plus_a     | FIG000859: h    | 0,045495814 | 0,605905233 | 24,45406098 | 22,35014366 | 4,056908867 | 2,019862208 | 0,497882076 |
| Bs | Respiration    | ATP synthases      | F0F1-type_ATP     | ATP synthase    | 0,046600561 | 0,605905233 | 20,41134752 | 1,185755276 | 1,563138605 | 1,953809058 | 1,249926942 |
| Bs | Clustering-ba  | Methylamine utiliz | CBSS-265072.7     | PlcB, ORFX, (   | 0,047109947 | 0,605905233 | 22,79569892 | 12,15643455 | 0,542676395 | 0,637053407 | 0,637053407 |
| Bs | Respiration    | NULL               | Biogenesis_of_c   | Cytochrome c    | 0,047109947 | 0,605905233 | 22,79569892 | 22,67511649 | 0,460001231 | 0,634065291 | 0,634065291 |
| Bs | Cell Wall and  | Gram-Negative ce   | KDO2-Lipid_A      | Lipid A export  | 0,047109947 | 0,605905233 | 22,79569892 | 22,67511649 | 0,460001231 | 0,634065291 | 0,634065291 |
| Bs | Clustering-ba  | Ribosomal Protei   | A_Gram-positiv    | Ribulose-phos   | 0,047228272 | 0,605905233 | 22,69903204 | 3,766019477 | 4,606295343 | 2,119110499 | 0,460046597 |
| Bs | Respiration    | ATP synthases      | F0F1-type_ATP     | ATP synthase    | 0,047939559 | 0,605905233 | 27,42105263 | 26,39539233 | 77,07237087 | 37,1228504  | 0,481662235 |
| Bs | Amino Acids a  | Branched-chain a   | Branched-Chain    | Leucine dehy    | 0,048080288 | 0,605905233 | 26,14452214 | 0,620571234 | 1,47569012  | 1,525870565 | 1,03400473  |
| Bs | Clustering-ba  | NULL               | Bacterial_Cell_D  | Cell division p | 0,048097937 | 0,605905233 | 27,30735931 | 25,7550511  | 12,81102653 | 7,382284402 | 0,576244565 |
| Bs | D Metabolism   | D repair           | D_repair_UvrA     | Excinuclease    | 0,048168198 | 0,605905233 | 27,08860759 | 25,66653267 | 6,449109761 | 3,632781461 | 0,56329968  |
| Bs | D Metabolism   | D repair           | D_repair_bacte    | Recombination i | 0,048730715 | 0,607650823 | 23,9245283  | 10,7862271  | 2,697952556 | 2,987808907 | 1,107435674 |
| Bs | Miscellaneous  | Plant-Prokaryote   | lojap             | Gamma-gluta     | 0,051588334 | 0,637738541 | 22,84957098 | 17,67969847 | 8,29746134  | 7,349901593 | 0,885801246 |
| Bs | Cell Wall and  | Capsular and extr  | dTDP-rhamnose     | Glucose-1-ph    | 0,05418328  | 0,658788637 | 23,9245283  | 3,47795965  | 7,906790976 | 5,802858555 | 0,733908178 |
| Bs | Cell Wall and  | Capsular and extr  | Rhamnose_con      | dTDP-glucose    | 0,054654743 | 0,658788637 | 26,98333333 | 0,135621939 | 17,06109541 | 10,52842982 | 0,617101632 |
| Bs | Cofactors, Vit | NULL               | Molybdopterin_c   | Periplasmic a   | 0,05466935  | 0,658788637 | 24,08224777 | 21,88332873 | 1,685847094 | 1,444943291 | 0,857102222 |
| P  | Cofactors, Vit | Tetrapyrroles      | Chlorophyll_Bio   | Chlorophyllide  | 0,018852239 | 0,457541435 | 26,88065844 | 26,79302371 | 126,8324058 | 131,4824998 | 1,036663296 |
| P  | Cofactors, Vit | Folate and pterine | YgfZ-Iron         | Iron-binding fe | 0,011584734 | 0,395879463 | 24,02547771 | 19,2300559  | 192,1116153 | 115,8009402 | 0,602779483 |
| P  | Stress Respo   | Cold shock         | Cold_shock_Cs     | Cold shock pr   | 0,006104225 | 0,293591464 | 27,2516129  | 26,29475861 | 141,7070942 | 83,87671591 | 0,591902024 |
| P  | Cofactors, Vit | Tetrapyrroles      | Chlorophyll_Bio   | Chlorophyllide  | 0,041057699 | 0,695148379 | 27,03563941 | 26,152064   | 73,19200025 | 83,70647799 | 1,143656106 |
| P  | Clustering-ba  | NULL               | Bacterial_R-met   | Polyribonucle   | 0,014265373 | 0,408816627 | 26,39808153 | 0,549757521 | 135,1748549 | 78,73247534 | 0,58244912  |
| P  | Respiration    | Electron acceptin  | Termil_cytochro   | Cytochrome c    | 0,009033249 | 0,348796343 | 26,98333333 | 26,91893502 | 134,2044655 | 58,60626287 | 0,436693836 |
| P  | Cofactors, Vit | Tetrapyrroles      | Chlorophyll_Bio   | Chlorophyllide  | 0,01712239  | 0,438652526 | 27,08860759 | 26,89568572 | 50,57549517 | 57,83074281 | 1,143453813 |
| P  | Clustering-ba  | Cytochrome bioge   | CBSS-196164.1     | Iron-sulfur clu | 0,001732815 | 0,220485526 | 27,36383442 | 24,93863997 | 162,0349699 | 53,96656081 | 0,333055024 |
| P  | Cofactors, Vit | Tetrapyrroles      | Chlorophyll_Bio   | Protopyrhyri    | 0,013481035 | 0,402529303 | 27,30735931 | 24,97703322 | 44,27666977 | 45,53780853 | 1,028483144 |
| P  | Stress Respo   | Cold shock         | Cold_shock_Cs     | Cold shock pr   | 0,000136039 | 0,220485526 | 27,1965812  | 27,03041224 | 69,08305496 | 42,81885478 | 0,619817042 |
| P  | Photosynthes   | Electron transport | Photosystem_II    | Photosynthesi   | 0,009834954 | 0,360095233 | 27,30735931 | 27,09713419 | 35,85930589 | 41,22286681 | 1,149572357 |
| P  | Clustering-ba  | Tricarboxylate tra | CBSS-49338.1.     | TRAP-type C     | 0,043797784 | 0,716860225 | 27,1965812  | 26,2945563  | 88,6617414  | 40,77853594 | 0,459933849 |
| P  | Photosynthes   | Electron transport | Photosystem_II    | Light-harvesti  | 0,054732697 | 0,768496823 | 27,36383442 | 27,16638428 | 44,10660745 | 40,30656911 | 0,913844239 |
| P  | Carbohydrate   | Organic acids      | Propiote-CoA_t    | Aconitate hyd   | 0,004381486 | 0,278057632 | 27,03563941 | 26,35004129 | 73,47160957 | 39,61566417 | 0,539196901 |
| P  | R Metabolism   | Transcription      | Transcription_in  | R polymerase    | 0,02378542  | 0,503240834 | 27,2516129  | 23,82492081 | 91,74830108 | 38,1596345  | 0,415916524 |
| P  | Stress Respo   | Cold shock         | Cold_shock_Cs     | Cold shock pr   | 0,00512363  | 0,282777765 | 27,30735931 | 27,2450193  | 56,66853981 | 37,76533512 | 0,666425061 |
| P  | Photosynthes   | Light-harvesting c | Bacterial_light-h | Light-harvesti  | 0,037568528 | 0,677401574 | 26,83026585 | 26,21080041 | 49,60066567 | 36,32077781 | 0,732263919 |
| P  | R Metabolism   | R processing and   | ATP-dependent     | ATP-depende     | 0,000814345 | 0,220485526 | 27,53777778 | 27,02136083 | 53,41041027 | 35,96331424 | 0,673339037 |
| P  | Protein Metab  | Protein biosynthe  | Ribosome_LSU      | LSU ribosoma    | 0,013149404 | 0,402529303 | 26,26950355 | 0,478751404 | 78,45224022 | 33,4531386  | 0,426414064 |

|   |                |                    |                   |                 |             |             |             |             |             |             |             |
|---|----------------|--------------------|-------------------|-----------------|-------------|-------------|-------------|-------------|-------------|-------------|-------------|
| P | Cofactors, Vit | Folate and pterine | YgfZ              | Formate dehy    | 0,028485289 | 0,571370512 | 27,65765766 | 0,387323648 | 57,06777123 | 32,55090427 | 0,57039032  |
| P | Miscellaneous  | Plant-Prokaryote   | COG2363           | ThiJ/Pfpl fam   | 0,012314746 | 0,395879463 | 23,9245283  | 19,50912106 | 57,78468343 | 31,48331875 | 0,544883474 |
| P | Membrane Tr    | NULL               | Ton_and_Tol_tr    | TonB-depend     | 0,002268484 | 0,241632696 | 27,53777778 | 27,26809232 | 68,92784843 | 31,10621098 | 0,451286551 |
| P | Stress Respo   | Oxidative stress   | Rubrerhythrin     | Rubrerhythrin   | 0,020749869 | 0,467856528 | 27,30735931 | 24,0784263  | 68,77133342 | 27,45167207 | 0,399173183 |
| P | Secondary Me   | Plant Hormones     | Auxin_degradat    | Peroxidase (E   | 0,049037184 | 0,731767439 | 26,93167702 | 25,27824497 | 88,50857381 | 26,95226523 | 0,304515869 |
| P | Photosynthes   | Electron transport | Photosystem_II    | Photosyntheti   | 0,019107905 | 0,457541435 | 26,93167702 | 26,76737768 | 28,13860995 | 26,66140963 | 0,947502726 |
| P | Carbohydrate   | Central carbohyd   | TCA_Cycle         | Isocitrate dehy | 0,018648557 | 0,457541435 | 27,36383442 | 26,93806554 | 59,25821834 | 26,56401116 | 0,448275563 |
| P | Protein Metab  | Protein biosynthe  | Ribosome_LSU      | LSU ribosoma    | 0,011987324 | 0,395879463 | 26,14452214 | 1,23404412  | 61,90618334 | 26,20671913 | 0,423329589 |
| P | Cofactors, Vit | Tetrapyrroles      | Chlorophyll_Bio   | Light-indepen   | 0,012559465 | 0,395879463 | 26,83026585 | 26,75375805 | 25,65570417 | 25,75468436 | 1,003858019 |
| P | R Metabolism   | Transcription      | Transcription_fa  | Transcription   | 0,007778663 | 0,329154641 | 27,2516129  | 26,93099094 | 65,46600487 | 25,61716826 | 0,391304897 |
| P | Stress Respo   | Detoxification     | Uptake_of_sele    | Various polyo   | 0,038815176 | 0,677401574 | 27,36383442 | 26,2945921  | 50,97896584 | 25,44327661 | 0,49909362  |
| P | Cofactors, Vit | Tetrapyrroles      | Chlorophyll_Bio   | Light-indepen   | 0,003643454 | 0,278057632 | 27,53777778 | 25,07281689 | 28,00345233 | 25,19652799 | 0,899765061 |
| P | Protein Metab  | Protein biosynthe  | Ribosome_LSU      | LSU ribosoma    | 0,015194899 | 0,420346343 | 22,33402583 | 3,863469819 | 66,54782126 | 25,1202864  | 0,374777217 |
| P | Protein Metab  | Protein biosynthe  | Ribosome_LSU      | LSU ribosoma    | 0,019869198 | 0,463702547 | 27,03563941 | 26,95397621 | 56,16605092 | 24,76673379 | 0,440955584 |
| P | Stress Respo   | Cold shock         | Cold_shock,_Cs    | Cold shock pr   | 0,001506018 | 0,220485526 | 27,78082192 | 27,0921506  | 57,80834135 | 24,5620258  | 0,424887226 |
| P | Amino Acids &  | Alanine, serine, a | Alanine_biosynt   | Cysteine desu   | 0,001410277 | 0,220485526 | 27,2516129  | 25,8344698  | 62,472373   | 24,26388328 | 0,388393815 |
| P | Cofactors, Vit | Tetrapyrroles      | Chlorophyll_Bio   | 2-desacetyl-2   | 0,004836475 | 0,278057632 | 27,2516129  | 26,30406363 | 24,51304704 | 23,0468036  | 0,940185182 |
| P | Miscellaneous  | Plant-Prokaryote   | Experimental_     | Serine hydrox   | 0,013860526 | 0,403916653 | 27,14225053 | 23,98617902 | 41,3197841  | 22,9848791  | 0,556268132 |
| P | Protein Metab  | Protein biosynthe  | Ribosome_biog     | Ribonuclease    | 0,030446954 | 0,594155362 | 27,65765766 | 25,86339741 | 37,0154263  | 21,35995643 | 0,57705553  |
| P | Miscellaneous  | Plant-Prokaryote   | COG0523           | LSU ribosoma    | 0,039358092 | 0,679094563 | 27,08860759 | 0,035883513 | 37,93820503 | 20,13619904 | 0,530763093 |
| P | Protein Metab  | Protein biosynthe  | Ribosome_Ssu      | Ssu ribosoma    | 0,000309882 | 0,220485526 | 22,88368539 | 3,77071615  | 46,31647001 | 20,06570933 | 0,43323054  |
| P | Phages, Prop   | Phages, Prophag    | Phage_regulatio   | R polymerase    | 0,001154724 | 0,220485526 | 27,42105263 | 24,90898633 | 89,30681281 | 19,36391845 | 0,21682465  |
| P | Carbohydrate   | One-carbon Meta    | Serine-glyoxylat  | Malate dehyd    | 0,048337169 | 0,728358613 | 27,14225053 | 27,0701314  | 38,14714027 | 19,02250288 | 0,498661308 |
| P | Clustering-ba  | Cell Division      | CBSS-393130.3     | Ssu ribosoma    | 0,004673355 | 0,278057632 | 26,26950355 | 0,127467989 | 55,00167674 | 18,74365418 | 0,340783323 |
| P | Protein Metab  | Protein folding    | GroEL_GroES       | Heat shock pr   | 0,051004522 | 0,743174387 | 23,49849272 | 18,01238225 | 71,89070742 | 18,70113224 | 0,260132817 |
| P | Amino Acids &  | Lysine, threonine, | Cysteine_Biosyn   | Sulfate perme   | 0,044268683 | 0,716860225 | 27,08860759 | 24,80891955 | 22,53795276 | 18,22245643 | 0,808523144 |
| P | Carbohydrate   | Central carbohyd   | Glyoxylate_bypa   | Aconitate hyd   | 0,00030507  | 0,220485526 | 25,94362343 | 0,192331544 | 30,42400445 | 17,76703843 | 0,58398093  |
| P | Protein Metab  | Protein biosynthe  | Ribosome_LSU      | LSU ribosoma    | 0,015484612 | 0,420346343 | 25,07029679 | 1,706528915 | 56,68301989 | 17,74702228 | 0,313092392 |
| P | Virulence, Dis | Resistance to ant  | Multidrug_Resis   | Acriflavin resi | 0,035405214 | 0,656727092 | 22,70807138 | 0,699605898 | 40,78958342 | 16,8850675  | 0,41395538  |
| P | Clustering-ba  | NULL               | LSU_ribosomal     | LSU ribosoma    | 0,012996847 | 0,402529303 | 26,39808153 | 0,328132968 | 43,21624695 | 16,78287959 | 0,388346531 |
| P | D Metabolism   | D repair           | D_repair,_bacte   | SOS-respons     | 0,021847081 | 0,48204024  | 27,08860759 | 26,41294843 | 22,73304754 | 16,74596362 | 0,736635226 |
| P | Protein Metab  | Protein biosynthe  | Ribosome_LSU      | LSU ribosoma    | 0,006052981 | 0,293591464 | 27,14225053 | 26,41555309 | 44,49298676 | 16,30248189 | 0,366405653 |
| P | Protein Metab  | Protein biosynthe  | Ribosome_LSU      | LSU ribosoma    | 0,010675247 | 0,379032629 | 24,02547771 | 5,14857682  | 24,50248038 | 15,97997164 | 0,652177714 |
| P | Protein Metab  | Protein biosynthe  | Universal_GTPa    | Sigl recognitic | 0,020429925 | 0,46760753  | 27,78082192 | 24,21131991 | 33,73867973 | 15,74618759 | 0,466710248 |
| P | R Metabolism   | R processing and   | ATP-dependent     | ATP-depende     | 0,00636796  | 0,293591464 | 27,42105263 | 24,93542979 | 22,10793145 | 15,22059447 | 0,688467598 |
| P | Protein Metab  | Protein processin  | Ribosomal_prot    | Ssu ribosoma    | 0,001367757 | 0,220485526 | 25,36067947 | 0,685416955 | 52,76267616 | 15,16348966 | 0,287390458 |
| P | Clustering-ba  | Probably Pyrimidi  | CBSS-306254.1     | Carbamoyl-ph    | 0,004829172 | 0,278057632 | 27,14225053 | 0,021002946 | 20,98367149 | 15,0430519  | 0,716893224 |
| P | Phages, Prop   | Pathogenicity isla | Staphylococcal    | GMP synthas     | 0,022492044 | 0,488877877 | 27,2516129  | 27,19643491 | 22,18426686 | 14,96519143 | 0,674585801 |
| P | Cofactors, Vit | Tetrapyrroles      | Chlorophyll_Bio   | Chlorophyll a   | 0,004431334 | 0,278057632 | 27,1965812  | 24,70323413 | 13,99451007 | 14,93406078 | 1,067137092 |
| P | Fatty Acids, L | Fatty acids        | Fatty_Acid_Bios   | Acyl carrier pr | 0,000512642 | 0,220485526 | 26,79542398 | 26,05436813 | 31,50135151 | 14,5914971  | 0,463202256 |
| P | Protein Metab  | Protein biosynthe  | tR_aminoacylati   | Valyl-tR synth  | 0,023030474 | 0,494035659 | 26,93167702 | 24,70483593 | 23,72645324 | 14,3946431  | 0,606691736 |
| P | Photosynthes   | Light-harvesting c | Bacterial_light-h | Light-harvesti  | 0,018739386 | 0,457541435 | 27,03563941 | 26,38219974 | 18,51143639 | 13,99005498 | 0,755751995 |
| P | Clustering-ba  | NULL               | CBSS-251221.1     | UDP-3-O-β-h     | 0,000607386 | 0,220485526 | 27,59731544 | 25,03229993 | 39,51820996 | 13,37520731 | 0,338456811 |
| P | D Metabolism   | D repair           | D_repair,_bacte   | RecA protein    | 0,019015565 | 0,457541435 | 24,35701153 | 2,555047037 | 48,0149527  | 12,72761413 | 0,265076053 |
| P | R Metabolism   | R processing and   | tR_modification   | Iron-sulfur clo | 0,003066779 | 0,278057632 | 26,69401281 | 24,67289495 | 44,84204349 | 12,31822875 | 0,274702663 |
| P | D Metabolism   | NULL               | D_structural_pro  | D-binding pro   | 0,012504362 | 0,395879463 | 25,33333333 | 0,904653006 | 34,3688895  | 11,75443735 | 0,342008064 |
| P | Miscellaneous  | Plant-Prokaryote   | PROSC             | Aspartate am    | 0,042639408 | 0,704348295 | 26,98333333 | 26,13272479 | 22,42059038 | 11,75096335 | 0,524114805 |
| P | Amino Acids &  | Branched-chain a   | Branched-Chain    | Dihydroxy-aci   | 0,015364828 | 0,420346343 | 27,11535986 | 24,49938317 | 26,20596758 | 11,52194455 | 0,439668733 |
| P | Respiration    | Electron acceptin  | Ubiquinone_Me     | ubiquinol cyto  | 0,00449106  | 0,278057632 | 27,1965812  | 26,30469237 | 28,81853275 | 11,06786108 | 0,384053594 |
| P | Amino Acids &  | Branched-chain a   | Branched_chain    | Electron trans  | 0,017401675 | 0,438652526 | 26,88065844 | 26,23640426 | 27,6939634  | 11,04600507 | 0,398859669 |

|   |                |                    |                   |                 |             |             |             |             |             |             |             |
|---|----------------|--------------------|-------------------|-----------------|-------------|-------------|-------------|-------------|-------------|-------------|-------------|
| P | Miscellaneous  | Plant-Prokaryote   | At5g04520_AT1     | Amidophosph     | 0,013552298 | 0,402529303 | 27,1965812  | 26,20822773 | 18,53368883 | 11,00052566 | 0,593542158 |
| P | Respiration    | Electron doting re | Respiratory_deh   | Proline dehyd   | 0,028005515 | 0,565418528 | 23,13348651 | 18,14138267 | 32,96327756 | 10,90339781 | 0,33077408  |
| P | D Metabolism   | D repair           | D_repair_UvrA     | Excinuclease    | 0,045765108 | 0,716860225 | 27,4790287  | 27,1024128  | 19,80858999 | 10,44142965 | 0,527116249 |
| P | Amino Acids    | Branched-chain a   | Isoleucine_degr   | Acyl-CoA deh    | 0,050505091 | 0,742061925 | 27,36383442 | 23,95541597 | 19,78144957 | 10,07422793 | 0,509276527 |
| P | Carbohydrate   | Central carbohyd   | Dehydrogese_c     | Pyruvate deh    | 0,000803361 | 0,220485526 | 27,2516129  | 26,33608463 | 12,73532439 | 9,696894489 | 0,761417157 |
| P | D Metabolism   | D replication      | D_topoisomer      | D gyrase sub    | 0,017466578 | 0,438652526 | 22,16515939 | 0,794561552 | 36,27677323 | 9,538696028 | 0,26294224  |
| P | Photosynthes   | Light-harvesting c | Bacterial_light-h | Light-harvesti  | 0,001330529 | 0,220485526 | 22,5882059  | 0,317569817 | 7,664623474 | 8,817281268 | 1,150386747 |
| P | Miscellaneous  | Plant-Prokaryote   | COG0523           | LSU ribosom     | 0,021474353 | 0,477225018 | 24,28629722 | 1,41794488  | 30,07571052 | 8,695242875 | 0,289111802 |
| P | Amino Acids    | Branched-chain a   | Isoleucine_degr   | 3-ketoacyl-Co   | 0,012363736 | 0,395879463 | 27,2516129  | 25,7133579  | 16,33743849 | 8,459699685 | 0,517810653 |
| P | Carbohydrate   | Central carbohyd   | Glycolysis_and    | Pyruvate,pho    | 0,00872719  | 0,341244193 | 26,88065844 | 24,70420599 | 24,23394888 | 8,283382269 | 0,341809018 |
| P | Carbohydrate   | Organic acids      | Isobutryl-CoA     | Methylmalote    | 0,001334643 | 0,220485526 | 26,89938637 | 24,57925319 | 13,0992566  | 8,269072306 | 0,631262716 |
| P | Protein Metab  | Protein biosynthe  | tR_aminoacylati   | Prolyl-tR synt  | 0,015154925 | 0,420346343 | 27,65765766 | 26,61825779 | 15,75806868 | 7,956875306 | 0,504939753 |
| P | Phosphorus M   | NULL               | Phosphate_met     | Probable low    | 0,006828331 | 0,307002454 | 25,89424805 | 0,625764283 | 8,444837308 | 7,728932183 | 0,915221154 |
| P | D Metabolism   | D replication      | D_topoisomer      | Topoisomera     | 0,004860833 | 0,278057632 | 26,53041363 | 24,42029845 | 11,17571526 | 7,446093984 | 0,66627449  |
| P | Protein Metab  | Protein biosynthe  | tR_aminoacylati   | Aspartyl-tR sy  | 0,037160587 | 0,677401574 | 25,44715447 | 0,810594928 | 11,64297011 | 7,404952022 | 0,636001978 |
| P | Cofactors, Vit | Tetrapyrroles      | Chlorophyll Bio   | Geranylgeran    | 0,016224902 | 0,424734928 | 24,61029009 | 0,174309751 | 8,537507428 | 7,324292145 | 0,857895845 |
| P | Carbohydrate   | Central carbohyd   | Pyruvate_metat    | Dihydrolipoan   | 0,003767115 | 0,278057632 | 27,36383442 | 24,82575365 | 15,12154428 | 7,117718469 | 0,470700501 |
| P | Carbohydrate   | Central carbohyd   | Pyruvate_metat    | Pyruvate oxid   | 0,022578013 | 0,488877877 | 23,38493523 | 2,425092755 | 12,78728062 | 6,785689714 | 0,530659326 |
| P | Cell Division  | NULL               | Two_cell_divisio  | Chromosome      | 0,046743904 | 0,716860225 | 24,80993747 | 23,74553173 | 13,37013443 | 6,77036279  | 0,50637956  |
| P | Carbohydrate   | NULL               | Sugar_utilizatio  | Glucose-6-ph    | 0,004115953 | 0,278057632 | 24,37701076 | 2,269563514 | 8,576678694 | 6,744581117 | 0,786386124 |
| P | Fatty Acids, L | Isoprenoids        | Carotenoids       | Geranylgeran    | 0,005973504 | 0,293591464 | 27,30735931 | 27,10900747 | 7,409274758 | 6,70527817  | 0,904984413 |
| P | Photosynthes   | Electron transport | Photosystem_II    | Photosynthetic  | 0,007350815 | 0,319812237 | 22,35690236 | 3,009234798 | 7,384606939 | 6,692150726 | 0,906229781 |
| P | Carbohydrate   | Central carbohyd   | Pentose_phosph    | Ribose-phosph   | 0,032244256 | 0,615575518 | 22,52786164 | 2,443763527 | 17,37753799 | 6,636048688 | 0,381875079 |
| P | Fatty Acids, L | Isoprenoids        | polyprenyl_synt   | 4-hydroxy-3-n   | 0,00821808  | 0,338475341 | 27,14225053 | 24,66265116 | 13,51037689 | 6,576504136 | 0,486774291 |
| P | Clustering-ba  | Clustering-based   | Sporulation-rela  | UDP-N-acetyl    | 0,014293362 | 0,408816627 | 24,71784663 | 1,136573061 | 10,57068125 | 6,475749653 | 0,61261422  |
| P | Respiration    | Electron doting re | Respiratory_Co    | DH ubiquinon    | 0,020436069 | 0,46760753  | 26,7804878  | 26,76899455 | 18,86900763 | 6,412687387 | 0,339852922 |
| P | Clustering-ba  | NULL               | CBSS-211586.1     | Protein-L-isoa  | 0,012110313 | 0,395879463 | 24,76362119 | 1,186864039 | 7,879702515 | 6,395141559 | 0,811596827 |
| P | Protein Metab  | Protein biosynthe  | tR_aminoacylati   | Arginyl-tR syr  | 0,013371076 | 0,402529303 | 22,74601643 | 4,135855391 | 10,09884548 | 6,019980161 | 0,59610578  |
| P | D Metabolism   | NULL               | D_structural_pr   | Integration hc  | 0,001141069 | 0,220485526 | 26,83026585 | 25,47024762 | 11,31232418 | 5,99714463  | 0,530142571 |
| P | Clustering-ba  | NULL               | CBSS-312309.3     | Methionine ar   | 0,050309548 | 0,742061925 | 25,86324786 | 24,30405045 | 17,3991947  | 5,901333656 | 0,339172804 |
| P | Photosynthes   | Light-harvesting c | Bacterial_light-h | Light-harvesti  | 0,015898026 | 0,422848415 | 27,1965812  | 26,1797121  | 4,827173977 | 5,872374698 | 1,216524353 |
| P | Photosynthes   | Light-harvesting c | Bacterial_light-h | Light-harvesti  | 0,008144218 | 0,338475341 | 26,83026585 | 26,19066937 | 6,038885048 | 5,808078308 | 0,961779908 |
| P | Cofactors, Vit | Tetrapyrroles      | Heme_and_Sirc     | Porphobilinog   | 0,029657777 | 0,583521487 | 26,66666667 | 0,479128414 | 7,3179875   | 5,656617329 | 0,772974445 |
| P | Potassium me   | NULL               | Potassium_hom     | Trk system po   | 0,053111904 | 0,758740521 | 26,98333333 | 26,11709335 | 7,361293235 | 5,653290562 | 0,767975189 |
| P | Stress Respo   | Oxidative stress   | Glutathione: Bi   | Glutamate--cy   | 0,048883331 | 0,731767439 | 26,0877193  | 25,45851477 | 11,17847395 | 5,6109532   | 0,501942682 |
| P | R Metabolism   | R processing and   | Methylthiotransf  | Ribosomal pr    | 0,046104507 | 0,716860225 | 27,1965812  | 24,64683439 | 7,410415921 | 5,555363301 | 0,749669568 |
| P | Membrane Tr    | Protein secretion  | Widespread_co     | Flp pilus asse  | 0,02535284  | 0,525603499 | 27,2516129  | 26,02739635 | 3,9899671   | 5,5502495   | 1,391051445 |
| P | Cofactors, Vit | Tetrapyrroles      | Heme_and_Sirc     | Porphobilinog   | 0,000904039 | 0,220485526 | 26,83026585 | 26,07783487 | 11,62060862 | 5,54087952  | 0,476814916 |
| P | R Metabolism   | R processing and   | R_processing_co   | 3'-to-5' exorib | 0,020613728 | 0,467856528 | 27,30735931 | 27,22297366 | 12,29612903 | 5,529015816 | 0,449654993 |
| P | Membrane Tr    | Protein secretion  | Widespread_co     | Type II/IV sec  | 0,036461417 | 0,670412599 | 27,03563941 | 0,004978793 | 6,388963652 | 5,458080026 | 0,854298181 |
| P | Motility and C | NULL               | Bacterial_Chem    | Maltose/maltc   | 0,001516512 | 0,220485526 | 26,93167702 | 24,72733127 | 7,503018304 | 5,432703891 | 0,724069124 |
| P | Cofactors, Vit | Tetrapyrroles      | Coenzyme_B12      | CobN compo      | 0,008329292 | 0,338541895 | 26,88065844 | 0,05390602  | 4,936688925 | 5,305998004 | 1,074809064 |
| P | Clustering-ba  | Ribosome-related   | A_Gammaprote      | 2-Keto-3-deo    | 0,041163505 | 0,695148379 | 27,11535986 | 23,76494808 | 9,704467316 | 5,103466571 | 0,525888378 |
| P | Regulation an  | Regulation of viru | BarA-UvrY(SirA    | GTP pyropho     | 0,00454092  | 0,278057632 | 27,2516129  | 26,31920816 | 11,14693366 | 5,081263775 | 0,455844085 |
| P | Fatty Acids, L | Isoprenoids        | Carotenoids       | 2-vinyl bacter  | 0,00203669  | 0,224690531 | 25,75527426 | 24,06447274 | 5,589853215 | 5,076988734 | 0,908250814 |
| P | Miscellaneous  | Plant-Prokaryote   | Scaffold_protein  | PaaD-like pro   | 0,014836158 | 0,420346343 | 23,38693139 | 21,39376949 | 14,61980018 | 5,039828822 | 0,344726245 |
| P | Fatty Acids, L | Phospholipids      | Glycerolipid_and  | Phosphate:ac    | 0,035047266 | 0,656127303 | 25,65       | 0,841756934 | 6,601510639 | 5,037979906 | 0,763155614 |
| P | Stress Respo   | NULL               | Carbon_Starvat    | Stringent star  | 0,020973158 | 0,46946438  | 24,55201288 | 2,624251946 | 6,404187254 | 4,934553778 | 0,770519909 |
| P | Secondary Me   | Plant Hormones     | Auxin_biosynthe   | Anthranilate p  | 0,009714976 | 0,360095233 | 26,93167702 | 25,45412435 | 4,521594458 | 4,881675551 | 1,079635867 |
| P | Fatty Acids, L | Isoprenoids        | Carotenoids       | Phytoene des    | 0,006196766 | 0,293591464 | 27,08860759 | 26,12524198 | 4,410862578 | 4,810384419 | 1,090576805 |

|   |                |                       |                   |                 |             |             |             |             |             |             |             |
|---|----------------|-----------------------|-------------------|-----------------|-------------|-------------|-------------|-------------|-------------|-------------|-------------|
| P | Respiration    | Electron acceptin     | Terminl_cytochro  | putative Cyto   | 0,004762178 | 0,278057632 | 25,4568805  | 24,11856312 | 7,8484693   | 4,751435347 | 0,605396437 |
| P | Fatty Acids, L | Isoprenoids           | Isoprenoid_Bios   | Isopentenyl-d   | 0,013722351 | 0,40369849  | 27,36383442 | 26,12269008 | 3,464383191 | 4,575054033 | 1,320596996 |
| P | Protein Metab  | Protein folding       | Protein_chapero   | Chaperone pr    | 0,002367715 | 0,24379573  | 26,12772906 | 0,166067966 | 21,70670603 | 4,448078577 | 0,204917253 |
| P | Respiration    | NULL                  | Flavocytochrom    | Flavocytochr    | 0,044354546 | 0,716860225 | 23,57625492 | 10,69937378 | 8,917685235 | 4,299142658 | 0,48209177  |
| P | Protein Metab  | Selenoproteins        | Glycine_reducta   | Thioredoxin re  | 0,029312627 | 0,583521487 | 27,14225053 | 26,95966884 | 15,87387106 | 4,193063188 | 0,264148749 |
| P | D Metabolism   | D repair              | D_repair_bacte    | D mismatch r    | 0,001902839 | 0,220485526 | 22,88368539 | 0,603813517 | 6,258654422 | 4,192966528 | 0,669946964 |
| P | Stress Respo   | Heat shock            | Heat_shock_dK     | Ribonuclease    | 0,005126434 | 0,282777765 | 23,51780179 | 1,518856594 | 6,378161433 | 4,174049063 | 0,654428256 |
| P | Membrane Tr    | ABC transporters      | ABC_transporte    | Branched-cha    | 0,008656474 | 0,341244193 | 26,03050109 | 0,189650834 | 5,006670096 | 4,019787966 | 0,802886527 |
| P | Amino Acids &  | Histidine Metabol     | Histidine_Biosyr  | Imidazoleglyc   | 0,019331246 | 0,457541435 | 23,61199295 | 21,39287077 | 5,21565712  | 4,012302595 | 0,769280362 |
| P | Stress Respo   | NULL                  | Hfl_operon        | GTP-binding p   | 0,002598472 | 0,258925205 | 22,31610942 | 0,225958    | 5,408261666 | 3,884190124 | 0,718195672 |
| P | Miscellaneous  | Plant-Prokaryote      | Scaffold_protein  | Methionyl-tR    | 0,009908739 | 0,360095233 | 26,0182894  | 23,46373189 | 14,30829438 | 3,876172346 | 0,270903872 |
| P | Respiration    | Electron doting re    | (+)-translocating | (+)-translocati | 0,006948268 | 0,307002454 | 26,53041363 | 0,217317077 | 7,51758994  | 3,863023314 | 0,513864596 |
| P | Clustering-ba  | Chromosome Rep        | SeqA_and_Co-c     | Phosphogluco    | 0,001428285 | 0,220485526 | 26,39808153 | 11,39931722 | 9,79702244  | 3,858376513 | 0,393831548 |
| P | Fatty Acids, L | Fatty acids           | Fatty_Acid_Bios   | Enoyl-[acyl-ca  | 0,016432186 | 0,426546405 | 23,06490958 | 20,79461276 | 10,10287509 | 3,716408803 | 0,367856553 |
| P | Protein Metab  | Protein biosynthe     | Ribosome_biog     | Ribosomal lar   | 0,050687946 | 0,742061925 | 27,1965812  | 26,16648325 | 2,749768711 | 3,646926747 | 1,326266727 |
| P | Protein Metab  | Protein processin     | G3E_family_of     | Cob(I)alamin    | 0,037373367 | 0,677401574 | 24,2037814  | 22,29090889 | 4,994897043 | 3,571672561 | 0,715064301 |
| P | Sulfur Metab   | NULL                  | Sulfur_oxidation  | Sulfur oxidati  | 0,053161047 | 0,758740521 | 25,44715447 | 24,02835004 | 7,674524212 | 3,5358929   | 0,46073122  |
| P | Carbohydrate   | CO2 fixation          | Calvin-Benson     | Ribose 5-pho    | 0,051705101 | 0,746341383 | 23,09440065 | 20,67593105 | 5,428508024 | 3,534437724 | 0,651088238 |
| P | Cofactors, Vit | Riboflavin, FMN,      | riboflavin_to_FA  | 3,4-dihydroxy   | 0,005497164 | 0,287809152 | 25,75527426 | 24,09069234 | 6,286024895 | 3,528395505 | 0,561307911 |
| P | Sulfur Metab   | Inorganic sulfur a    | Inorganic_Sulfu   | Sulfate adeny   | 0,006957    | 0,307002454 | 27,71882086 | 27,30729412 | 4,108394053 | 3,503041487 | 0,852654697 |
| P | Amino Acids &  | Arginine; urea cyc    | Arginine_and_C    | Ornithine cycl  | 0,026853128 | 0,552995424 | 22,81579943 | 3,571625864 | 11,14782132 | 3,476202243 | 0,311827948 |
| P | Protein Metab  | Selenoproteins        | Selenocysteine    | Selenide,wate   | 0,00385094  | 0,278057632 | 26,7804878  | 25,55235848 | 2,558883903 | 3,45277755  | 1,349329505 |
| P | Miscellaneous  | Plant-Prokaryote      | COG2363           | Cysteine desu   | 0,054396033 | 0,767257285 | 27,78082192 | 24,31254872 | 3,97382468  | 3,448631102 | 0,867836752 |
| P | R Metabolism   | R processing and      | tR_processing     | Ribonuclease    | 0,00445128  | 0,278057632 | 25,57841414 | 23,9575205  | 3,709897654 | 3,338447182 | 0,899875817 |
| P | Amino Acids &  | Aromatic amino a      | Tryptophan_syn    | Phosphoribos    | 0,049657407 | 0,737460239 | 24,32876281 | 21,97368023 | 3,20074229  | 3,325256217 | 1,038901579 |
| P | Clustering-ba  | Protein export?       | CBSS-393121.3     | Cell division t | 0,031602261 | 0,610121148 | 27,4790287  | 26,33807529 | 3,081356064 | 3,223441107 | 1,046111206 |
| P | Clustering-ba  | NULL                  | CBSS-296591.1     | UDP-N-acetyl    | 0,017880024 | 0,445414458 | 24,36447136 | 3,192544344 | 5,586711812 | 3,20592498  | 0,573848283 |
| P | Cell Wall and  | NULL                  | Recycling_of_P    | UDP-N-acetyl    | 0,010466226 | 0,375932244 | 27,14225053 | 25,5772952  | 4,041734803 | 3,18956228  | 0,789156745 |
| P | Nitrogen Meta  | NULL                  | Nitrate_and_nitr  | Nitrate ABC tr  | 0,017330648 | 0,438652526 | 23,3133083  | 5,36823305  | 3,178471701 | 3,037774617 | 0,95573436  |
| P | R Metabolism   | R processing and      | tR_modification   | tR delta(2)-isc | 0,005287022 | 0,286328124 | 26,31871646 | 0,41367754  | 2,39861653  | 2,997461779 | 1,249662771 |
| P | Amino Acids &  | Histidine Metabol     | Histidine_Biosyr  | ATP phospho     | 0,03058294  | 0,594155362 | 26,7804878  | 24,69782607 | 3,725939989 | 2,951873892 | 0,792249446 |
| P | Cofactors, Vit | Riboflavin, FMN,      | Riboflavin,_FMN   | 6,7-dimethyl-8  | 0,00086403  | 0,220485526 | 24,50292997 | 0,966538612 | 2,655731526 | 2,866352633 | 1,079308132 |
| P | Respiration    | Electron doting re    | NiFe_hydrogese    | [NiFe] hydrog   | 0,044281042 | 0,716860225 | 23,16584967 | 17,94472854 | 3,408753847 | 2,826770965 | 0,829268141 |
| P | Carbohydrate   | CO2 fixation          | CO2_uptake,_c     | carboxysome     | 0,027724939 | 0,563436418 | 27,08860759 | 25,68897005 | 1,766215036 | 2,700926655 | 1,529217337 |
| P | Cofactors, Vit | Folate and pterine    | YgfZ              | Rhodanese-re    | 0,007737333 | 0,329154641 | 24,10906138 | 1,093576456 | 4,651627094 | 2,617034028 | 0,562606154 |
| P | Amino Acids &  | Proline and 4-hyd     | Proline,_4-hydro  | Proline iminop  | 0,003329356 | 0,278057632 | 26,63869464 | 24,58267605 | 3,443135832 | 2,591983975 | 0,752797479 |
| P | Cofactors, Vit | Riboflavin, FMN,      | Flavodoxin        | Flavodoxin      | 0,032789191 | 0,62138534  | 21,55191257 | 3,003082185 | 2,399391448 | 2,515615834 | 1,04843911  |
| P | Fatty Acids, L | Fatty acids           | Fatty_Acid_Bios   | (3R)-hydroxyr   | 0,013270167 | 0,402529303 | 20,71598989 | 1,652709235 | 4,009228919 | 2,511487785 | 0,626426636 |
| P | Miscellaneous  | Plant-Prokaryote      | COG0398           | COG0398: un     | 0,02957203  | 0,583521487 | 26,03050109 | 25,80645956 | 2,252525069 | 2,474534015 | 1,098560033 |
| P | Photosynthes   | Electron transport    | Photosystem_II    | Putative phot   | 0,000683335 | 0,220485526 | 22,84957098 | 20,85193504 | 3,525070279 | 2,457761442 | 0,697223388 |
| P | Nucleosides &  | Pyrimidines           | pyrimidine_conv   | Cytidylate kis  | 0,015943421 | 0,422848415 | 26,88065844 | 26,06227693 | 3,617669763 | 2,361312921 | 0,652716548 |
| P | R Metabolism   | R processing and      | Polyadenylation   | Poly(A) polym   | 0,001753903 | 0,220485526 | 25,3935187  | 0,469943632 | 2,070489713 | 2,355204334 | 1,137510763 |
| P | Amino Acids &  | Lysine, threonine,    | Cysteine_Biosyr   | Phosphoaden     | 0,001692761 | 0,220485526 | 23,49694021 | 11,55419769 | 2,22630881  | 2,342197306 | 1,052054097 |
| P | Nitrogen Meta  | NULL                  | Nitrate_and_nitr  | Respiratory n   | 0,003913794 | 0,278057632 | 26,7804878  | 25,5868449  | 1,752408588 | 2,327819404 | 1,328354254 |
| P | Motility and C | Flagellar motility il | Flagellum         | Flagellar mot   | 0,023447069 | 0,499503413 | 24,45637584 | 15,53782369 | 1,753541906 | 2,318893956 | 1,322405782 |
| P | Carbohydrate   | Monosaccharides       | Fructose_utiliza  | Fructose ABC    | 0,051317342 | 0,744221919 | 23,8055197  | 3,440459882 | 1,496031742 | 2,304169961 | 1,540187883 |
| P | Carbohydrate   | Monosaccharides       | L-fucose_utiliza  | 2-keto-3-deox   | 0,009155019 | 0,349134002 | 26,02298851 | 23,15506336 | 1,992092862 | 2,300053594 | 1,154591554 |
| P | Miscellaneous  | Plant-Prokaryote      | COG3533           | sugar ABC tra   | 0,038528248 | 0,677401574 | 22,6152026  | 10,03227627 | 1,775740165 | 2,206209169 | 1,242416662 |
| P | Miscellaneous  | NULL                  | Broadly_distribu  | YpfJ protein, i | 0,032283339 | 0,615575518 | 26,53041363 | 25,83577929 | 2,024476321 | 2,203196403 | 1,08827966  |
| P | Amino Acids &  | Glutamine, glutan     | Glutamine,_Glu    | Aspartate am    | 0,004745032 | 0,278057632 | 25,91827957 | 24,38212196 | 2,83883273  | 2,12688023  | 0,749209422 |

|   |                 |                      |                   |                 |             |             |             |             |             |             |             |
|---|-----------------|----------------------|-------------------|-----------------|-------------|-------------|-------------|-------------|-------------|-------------|-------------|
| P | Cell Division a | NULL                 | Bacterial_Cytos   | Cell division p | 0,001078529 | 0,220485526 | 23,46607451 | 0,902760376 | 5,095393192 | 2,117038107 | 0,415480813 |
| P | Photosynthes    | Light-harvesting c   | Bacterial_light-h | Protein PufQ,   | 0,009888087 | 0,360095233 | 27,59731544 | 24,93986171 | 1,683432322 | 2,1129543   | 1,255146567 |
| P | Cell Wall and   | Gram-Negative c      | Lipopolysacchar   | Inner membra    | 0,004195466 | 0,278057632 | 23,2021353  | 3,318881421 | 2,322623343 | 2,110361059 | 0,908610975 |
| P | Cofactors, Vit  | Folate and pterine   | Molybdenum_cc     | Molybdenum      | 0,035504508 | 0,656727092 | 27,53777778 | 26,5820555  | 2,108519306 | 2,044659165 | 0,969713277 |
| P | Stress Respo    | Oxidative stress     | Redox-depende     | D-dependent     | 0,003281022 | 0,278057632 | 22,84957098 | 20,42914252 | 2,045100287 | 1,991886821 | 0,973980021 |
| P | Carbohydrate    | Monosaccharides      | L-rhamnose_uti    | Predicted L-la  | 0,005376184 | 0,286328124 | 22,96194541 | 22,3537484  | 3,394564601 | 1,921830041 | 0,566149202 |
| P | Motility and C  | Flagellar motility i | Flagellum_in_C    | Flagellin prote | 0,008475369 | 0,340005372 | 22,86665133 | 17,22575895 | 7,902764329 | 1,913396729 | 0,242117397 |
| P | Stress Respo    | Osmotic stress       | Ectoine_biosynt   | L-2,4-diamino   | 0,016015948 | 0,422848415 | 27,03877418 | 0,088303966 | 2,223244371 | 1,888851594 | 0,849592433 |
| P | Miscellaneous   | Plant-Prokaryote     | COG3760           | FIG000875: T    | 0,027679971 | 0,563436418 | 27,30735931 | 25,81122437 | 1,809453828 | 1,86369852  | 1,029978489 |
| P | Clustering-ba   | NULL                 | CBSS-296591.1     | Nucleotide su   | 0,005860748 | 0,293591464 | 25,33333333 | 12,06806848 | 2,180500047 | 1,852314072 | 0,849490499 |
| P | Membrane Tr     | Protein translocat   | Bacterial_sigl_re | Sigl recogniti  | 0,015512944 | 0,420346343 | 26,83026585 | 25,45093022 | 4,207861409 | 1,801870179 | 0,428215191 |
| P | Regulation an   | Programmed Cell      | Toxin-antitoxin   | YefM protein    | 0,004264989 | 0,278057632 | 26,66666667 | 25,43741693 | 2,342171122 | 1,755732135 | 0,749617361 |
| P | Fatty Acids, L  | Fatty acids          | Fatty_acid_metal  | Long-chain-ac   | 0,006349166 | 0,293591464 | 27,36383442 | 25,84275318 | 1,245414961 | 1,714723907 | 1,376829379 |
| P | Membrane Tr     | NULL                 | Transport_of_Zi   | Zinc ABC tran   | 0,006349166 | 0,293591464 | 27,36383442 | 26,22418671 | 1,246058089 | 1,69936473  | 1,363792544 |
| P | Carbohydrate    | Organic acids        | Methylcitrate_cy  | Propiote--CoA   | 0,02263177  | 0,488877877 | 23,9245283  | 7,89606265  | 7,258552392 | 1,682528148 | 0,231799408 |
| P | Potassium me    | NULL                 | Potassium_hom     | Large-conduc    | 0,047860819 | 0,724716025 | 22,63987241 | 10,03179185 | 3,261475049 | 1,667181318 | 0,511174022 |
| P | Nucleosides a   | Pyrimidines          | pyrimidine_conv   | 2',3'-cyclic-nu | 0,003980785 | 0,278057632 | 26,44748858 | 0,434348019 | 1,341912952 | 1,638841034 | 1,221272238 |
| P | Carbohydrate    | Di- and oligosacc    | Maltose_and_M     | Putative sucra  | 0,001927196 | 0,220485526 | 22,81459335 | 21,16915289 | 1,905043607 | 1,630433445 | 0,855850984 |
| P | Potassium me    | NULL                 | Potassium_hom     | Potassium eff   | 0,039571713 | 0,679094563 | 23,82608696 | 5,405835656 | 5,675553131 | 1,559048969 | 0,274695511 |
| P | Metabolism of   | Metabolism of cer    | Protocatechuate   | 3-oxoadipate    | 0,046852964 | 0,716860225 | 27,65765766 | 27,31115441 | 1,267151123 | 1,55423563  | 1,226559012 |
| P | Nucleosides a   | NULL                 | Hydantoin_metal   | N-methylhyda    | 0,039571713 | 0,679094563 | 23,82608696 | 16,77849926 | 1,355709637 | 1,542537474 | 1,13780815  |
| P | Protein Metab   | Protein degradati    | Dipeptidases_(E   | Alpha-aspart    | 0,038663564 | 0,677401574 | 22,77062572 | 9,280055121 | 1,05312794  | 1,489011954 | 1,413894644 |
| P | Cell Wall and   | Capsular and extr    | Rhamnose_con      | capsular poly   | 0,011710564 | 0,395879463 | 20,55549166 | 0,963011088 | 1,122703268 | 1,391153543 | 1,239110621 |
| P | R Metabolism    | R processing and     | tRmodification    | tR (uridine-5-c | 0,003739138 | 0,278057632 | 22,88368539 | 3,488128336 | 1,116338114 | 1,381283589 | 1,237334435 |
| P | Amino Acids a   | Lysine, threonine    | Lysine_Biosynt    | Diaminopimel    | 0,019403667 | 0,457541435 | 26,93167702 | 25,71829592 | 1,518108778 | 1,353154756 | 0,891342423 |
| P | Miscellaneous   | NULL                 | ZZ_gjo_need_h     | +H+ antiporte   | 0,038528248 | 0,677401574 | 22,6152026  | 3,942323512 | 1,147404246 | 1,212363246 | 1,056613875 |
| P | Motility and C  | Flagellar motility i | Flagellum         | Flagellar bios  | 0,019965179 | 0,463702547 | 25,0647482  | 25,01429123 | 0,87384449  | 1,18874455  | 1,18874455  |
| P | Nucleosides a   | Pyrimidines          | pyrimidine_conv   | Cytosine deam   | 0,025145136 | 0,524819763 | 21,34249625 | 10,99846695 | 1,956820544 | 1,186514309 | 0,606348044 |
| P | Amino Acids a   | Lysine, threonine    | Lysine_Biosyn     | Sulfate perme   | 0,038528248 | 0,677401574 | 22,6152026  | 14,73117638 | 0,872108019 | 1,180661579 | 1,180661579 |
| P | Sulfur Metabo   | Organic sulfur ass   | Utilization_of_gl | Putative gluta  | 0,025145136 | 0,524819763 | 21,34249625 | 1,145177248 | 1,038886134 | 1,157097973 | 1,113787098 |
| P | Amino Acids a   | Arginine; urea cyc   | Arginine_Biosyn   | Glutamate N-    | 0,001900801 | 0,220485526 | 25,17616445 | 1,271589092 | 2,036778749 | 1,151706405 | 0,565454841 |
| P | Miscellaneous   | Plant-Prokaryote     | COG0523           | Zinc ABC tran   | 0,001900801 | 0,220485526 | 25,17616445 | 1,271589092 | 1,036778749 | 1,151706405 | 1,110850705 |
| P | Membrane Tr     | Protein translocat   | Twin-arginine_tr  | Deoxyribonuc    | 0,011901789 | 0,395879463 | 26,66666667 | 25,43741693 | 0,801862606 | 1,123344543 | 1,123344543 |
| P | Nucleosides a   | Purines              | Purine_convers    | GMP reducta     | 0,011901789 | 0,395879463 | 26,66666667 | 25,43741693 | 0,801862606 | 1,123344543 | 1,123344543 |
| P | Fatty Acids, L  | Fatty acids          | Fatty_acid_degr   | Long-chain fa   | 0,011901789 | 0,395879463 | 26,66666667 | 25,43741693 | 0,801862606 | 1,123344543 | 1,123344543 |
| P | Clustering-ba   | NULL                 | EC49-61           | Bis(5'-nucleos  | 0,038528248 | 0,677401574 | 22,6152026  | 10,03227627 | 0,887870083 | 1,103104584 | 1,103104584 |
| P | Virulence, Dis  | Resistance to ant    | Copper_homeos     | Multicopper o   | 0,035047266 | 0,656127303 | 25,65       | 0,841756934 | 1,920302128 | 1,007595981 | 0,524707007 |
| P | Clustering-ba   | NULL                 | Aerotolerance_c   | BatA (Bacter    | 0,041857429 | 0,695148379 | 21,40463458 | 12,79087264 | 0,771539961 | 0,967920827 | 0,967920827 |
| P | Amino Acids a   | Lysine, threonine    | Threonine_and     | Homoserine k    | 0,041857429 | 0,695148379 | 21,40463458 | 12,79087264 | 0,771539961 | 0,967920827 | 0,967920827 |
| P | Membrane Tr     | NULL                 | Ton_and_Tol_tr    | TPR domain      | 0,041857429 | 0,695148379 | 21,40463458 | 12,79087264 | 0,771539961 | 0,967920827 | 0,967920827 |
| P | Membrane Tr     | NULL                 | Ton_and_Tol_tr    | TolA protein    | 0,041857429 | 0,695148379 | 21,40463458 | 12,79087264 | 0,771539961 | 0,967920827 | 0,967920827 |
| P | Regulation an   | Programmed Cell      | Phd-Doc,_YdcE     | FIG022160: h    | 0,053546595 | 0,758740521 | 24,71784663 | 11,77735221 | 0,814156785 | 0,841264413 | 0,841264413 |
| P | Clustering-ba   | NULL                 | Conserved_gen     | tR:m(5)U-54 f   | 0,053546595 | 0,758740521 | 24,71784663 | 24,56735959 | 6,187448976 | 0,827574296 | 0,133750484 |
| P | Clustering-ba   | Lysine Biosynthes    | A_Glutathione-c   | FIG138056: a    | 0,047109947 | 0,716860225 | 22,79569892 | 12,15643455 | 0,542676395 | 0,637053407 | 0,637053407 |
| P | Metabolism of   | NULL                 | Phenylacetyl-Cc   | Phenylacetate   | 0,047109947 | 0,716860225 | 22,79569892 | 12,15643455 | 0,542676395 | 0,637053407 | 0,637053407 |
| P | Cofactors, Vit  | Tetrapyrroles        | Coenzyme_B12      | Alpha-ribazole  | 0,047109947 | 0,716860225 | 22,79569892 | 22,67511649 | 0,460001231 | 0,634065291 | 0,634065291 |
| P | Regulation an   | Programmed Cell      | Murein_hydrolas   | Cytidine deam   | 0,047109947 | 0,716860225 | 22,79569892 | 22,67511649 | 0,460001231 | 0,634065291 | 0,634065291 |
| P | Amino Acids a   | Histidine Metaboli   | Histidine_Biosyn  | Histidinol-pho  | 0,047109947 | 0,716860225 | 22,79569892 | 22,67511649 | 0,460001231 | 0,634065291 | 0,634065291 |
| P | Carbohydrate    | Monosaccharides      | L-Arabinose_uti   | L-arabinose-b   | 0,047109947 | 0,716860225 | 22,79569892 | 22,67511649 | 0,460001231 | 0,634065291 | 0,634065291 |
| P | Cell Wall and   | NULL                 | Murein_Hydrola    | Muramoyltetra   | 0,047109947 | 0,716860225 | 22,79569892 | 22,67511649 | 0,460001231 | 0,634065291 | 0,634065291 |

|   |                |                    |                  |                 |             |             |             |             |             |             |             |
|---|----------------|--------------------|------------------|-----------------|-------------|-------------|-------------|-------------|-------------|-------------|-------------|
| P | Respiration    | Electron doting re | Succite_dehydro  | Succite dehydro | 0,047109947 | 0,716860225 | 22,79569892 | 22,67511649 | 0,460001231 | 0,634065291 | 0,634065291 |
| C | Amino Acids    | Lysine, threonine, | Threonine_and    | -none-          | 0,000102295 | 0,157636901 | 27,53777778 | 24,56576226 | 70,62332931 | 40,27295084 | 0,570249962 |
| C | Respiration    | NULL               | Cytochrome_B6    | -none-          | 0,000796488 | 0,398777039 | 22,98813879 | 21,03234625 | 82,66528248 | 23,47590538 | 0,283987482 |
| C | Clustering-ba  | NULL               | CBSS-176280.1    | -none-          | 0,000938771 | 0,398777039 | 21,4962624  | 0,368955129 | 3,262596123 | 2,217789293 | 0,679762131 |
| C | Miscellaneous  | Plant-Prokaryote   | lojap            | -none-          | 0,001035112 | 0,398777039 | 25,55227148 | 24,22535092 | 1,565339218 | 1,676278192 | 1,070872162 |
| C | Fatty Acids, L | Phospholipids      | Glycerolipid_and | -none-          | 0,001591409 | 0,475608245 | 23,09902399 | 21,6965356  | 15,70324088 | 9,634007692 | 0,61350442  |
| C | Clustering-ba  | NULL               | CBSS-87626.3     | -none-          | 0,001851817 | 0,475608245 | 22,74601643 | 15,43119173 | 5,162610047 | 2,898038972 | 0,561351515 |
| C | Nitrogen Meta  | NULL               | Ammonia_assin    | -none-          | 0,002367715 | 0,521235565 | 26,12772906 | 24,65201058 | 1,852235461 | 2,154234671 | 1,163045799 |
| C | R Metabolism   | Transcription      | Transcription_fa | -none-          | 0,003483702 | 0,55493643  | 23,50669667 | 15,38125856 | 12,77560195 | 13,74264236 | 1,075694313 |
| C | Cell Wall and  | Capsular and extr  | CMP-N-acetyln    | -none-          | 0,003734473 | 0,55493643  | 22,95296388 | 21,31690783 | 1,091094891 | 1,340502029 | 1,228584278 |
| C | Sulfur Metabo  | Inorganic sulfur a | Inorganic_Sulfu  | -none-          | 0,004060929 | 0,55493643  | 27,2516129  | 25,72663941 | 6,105369394 | 6,520639952 | 1,06801727  |
| C | Miscellaneous  | Plant-Prokaryote   | COG0523          | -none-          | 0,004098625 | 0,55493643  | 26,7804878  | 26,03170819 | 5,368013658 | 4,567916525 | 0,850950988 |
| C | Clustering-ba  | NULL               | D_replication_cl | -none-          | 0,004752391 | 0,55493643  | 20,37584419 | 12,95416375 | 3,217860493 | 2,96315739  | 0,920847065 |
| C | Potassium me   | NULL               | Potassium_hom    | -none-          | 0,00522836  | 0,55493643  | 21,92053872 | 14,61398396 | 4,892814104 | 5,082295311 | 1,038726427 |
| C | Virulence, Dis | NULL               | Streptococcus_   | -none-          | 0,005726368 | 0,55493643  | 23,60468769 | 13,196362   | 2,205546473 | 1,392607758 | 0,631411659 |
| C | Potassium me   | NULL               | Potassium_hom    | -none-          | 0,005937569 | 0,55493643  | 24,93617021 | 12,03445428 | 1,614535903 | 1,669699044 | 1,034166562 |
| C | Amino Acids    | Arginine; urea cyc | Polyamine_Met    | -none-          | 0,005982478 | 0,55493643  | 24,68495607 | 12,91254424 | 2,132368521 | 2,356233524 | 1,1049842   |
| C | Membrane Tr    | NULL               | Ton_and_Tol_tr   | -none-          | 0,006943389 | 0,55493643  | 27,4790287  | 24,87292301 | 5,454949496 | 6,168604544 | 1,130827068 |
| C | Clustering-ba  | tR sulfuration     | CBSS-89187.3     | -none-          | 0,007128603 | 0,55493643  | 20,19243986 | 11,72817133 | 3,770092765 | 3,988883627 | 1,058033283 |
| C | Cofactors, Vit | Quinone cofactor   | Ubiquinone_Bio   | -none-          | 0,007239423 | 0,55493643  | 27,4790287  | 24,92180818 | 2,66526803  | 2,590271513 | 0,971861548 |
| C | R Metabolism   | R processing and   | R_methylation    | -none-          | 0,007624524 | 0,55493643  | 22,58074009 | 17,13151929 | 1,17915705  | 1,37652427  | 1,167379926 |
| C | Clustering-ba  | Putative asociate  | CBSS-316057.3    | -none-          | 0,007680983 | 0,55493643  | 23,6104977  | 1,964029482 | 3,965607139 | 2,313906986 | 0,583493751 |
| C | Virulence, Dis | Resistance to ant  | Arsenic_resista  | -none-          | 0,008239191 | 0,55493643  | 24,75510952 | 11,94473395 | 14,27682827 | 10,85583028 | 0,760381093 |
| C | Photosynthes   | Electron transport | Photosystem_II   | -none-          | 0,008282633 | 0,55493643  | 24,23529412 | 21,0704372  | 9,462281682 | 5,652615087 | 0,597383937 |
| C | Clustering-ba  | NULL               | CBSS-56780.10    | -none-          | 0,009116012 | 0,585323933 | 22,65001858 | 16,96007577 | 3,944219723 | 2,453851536 | 0,622138651 |
| C | Membrane Tr    | Protein and nucle  | pVir_Plasmid_o   | -none-          | 0,009542978 | 0,588229168 | 21,1396648  | 12,8861615  | 19,40368124 | 8,052480767 | 0,414997581 |
| C | Clustering-ba  | Probably GTP or    | CBSS-176299.4    | -none-          | 0,01038096  | 0,615271528 | 26,7804878  | 25,48010759 | 2,612880919 | 2,251921953 | 0,861854031 |
| C | R Metabolism   | Transcription      | Transcription_fa | -none-          | 0,010811249 | 0,617042045 | 22,75664251 | 17,91252187 | 19,74737656 | 9,874703604 | 0,500051416 |
| C | Metabolism of  | Metabolism of cer  | Protocatechuete  | -none-          | 0,011901789 | 0,63521807  | 26,66666667 | 25,43741693 | 0,801862606 | 1,123344543 | 1,123344543 |
| C | Amino Acids    | Histidine Metaboli | Histidine_Biosyr | -none-          | 0,012372881 | 0,63521807  | 20,52049911 | 13,29735397 | 9,853185401 | 8,194429647 | 0,831652843 |
| C | Amino Acids    | Lysine, threonine, | Cysteine_Biosyr  | -none-          | 0,012644507 | 0,63521807  | 22,90410114 | 16,7502549  | 7,808844417 | 5,093044482 | 0,652214875 |
| C | Regulation an  | NULL               | cAMP_sigling_ir  | -none-          | 0,012778559 | 0,63521807  | 27,4790287  | 24,79869669 | 30,18672198 | 28,03878113 | 0,928844846 |
| C | Cell Wall and  | NULL               | Murein_Hydrولا   | -none-          | 0,013740386 | 0,661685484 | 27,14225053 | 23,91453909 | 8,707674482 | 5,083718159 | 0,583820418 |
| C | D Metabolism   | D repair           | D_repair_bacte   | -none-          | 0,015247872 | 0,672718539 | 27,1965812  | 26,16836023 | 1,506839345 | 2,19387714  | 1,45594628  |
| C | Clustering-ba  | NULL               | Ribonucleotide   | -none-          | 0,015926546 | 0,672718539 | 25,9047619  | 23,23811522 | 4,760660452 | 3,397267821 | 0,713612713 |
| C | Protein Metab  | Protein biosynthe  | Ribosome_LSU     | -none-          | 0,016428594 | 0,672718539 | 27,1965812  | 27,15095    | 22,85813366 | 15,37637997 | 0,672687464 |
| C | D Metabolism   | D replication      | D_Helicase_of    | -none-          | 0,016570566 | 0,672718539 | 27,14225053 | 25,9809501  | 5,61017058  | 3,298790674 | 0,588001849 |
| C | Protein Metab  | Protein biosynthe  | tR_aminoacylati  | -none-          | 0,016590065 | 0,672718539 | 21,66813057 | 11,1652588  | 3,065203152 | 2,455809833 | 0,801189909 |
| C | Nitrogen Meta  | NULL               | Nitrogen_fixatio | -none-          | 0,016890474 | 0,672718539 | 26,93167702 | 24,74793063 | 6,006737989 | 7,167914054 | 1,193312255 |
| C | Clustering-ba  | Isoprenoid/cell we | CBSS-83331.1     | -none-          | 0,017025323 | 0,672718539 | 24,02547771 | 15,07376266 | 9,907157372 | 6,305204823 | 0,636429259 |
| C | Clustering-ba  | NULL               | CBSS-323097.3    | -none-          | 0,019849953 | 0,691541799 | 25,97402597 | 25,32626698 | 8,58895331  | 7,459352518 | 0,868482136 |
| C | Membrane Tr    | ABC transporters   | ABC_transporter  | -none-          | 0,019965179 | 0,691541799 | 25,0647482  | 24,87812515 | 0,876160122 | 1,162784665 | 1,162784665 |
| C | Protein Metab  | Protein degradati  | Putative_TidE-T  | -none-          | 0,019965179 | 0,691541799 | 25,0647482  | 24,87812515 | 0,876160122 | 1,162784665 | 1,162784665 |
| C | Stress Respo   | Oxidative stress   | Oxidative_stress | -none-          | 0,020881843 | 0,691541799 | 23,73006135 | 16,96794746 | 180,1805005 | 150,2996887 | 0,83416179  |
| C | Stress Respo   | NULL               | SigmaB_stress    | -none-          | 0,021131648 | 0,691541799 | 23,77826285 | 19,62246896 | 19,47738218 | 10,34439579 | 0,531097849 |
| C | Nitrogen Meta  | NULL               | Ammonia_assin    | -none-          | 0,021268967 | 0,691541799 | 21,80541124 | 14,09903684 | 3,325584663 | 3,640557287 | 1,094711955 |
| C | Photosynthes   | Electron transport | Photosystem_I    | -none-          | 0,021287221 | 0,691541799 | 21,72946762 | 1,225442852 | 1,491508149 | 1,777360679 | 1,191653348 |
| C | Miscellaneous  | Plant-Prokaryote   | Experimental-U   | -none-          | 0,02148372  | 0,691541799 | 20,64468864 | 13,02989043 | 69,03821071 | 23,55969223 | 0,341255835 |
| C | Amino Acids    | Arginine; urea cyc | Arginine_Biosyn  | -none-          | 0,021540562 | 0,691541799 | 24,12903226 | 19,5656654  | 9,530622791 | 6,057380484 | 0,635570268 |
| C | Miscellaneous  | NULL               | Broadly_distribu | -none-          | 0,022380282 | 0,703837039 | 23,04039283 | 14,22123254 | 6,620199647 | 5,385478189 | 0,813491809 |



|                              |                |                    |                   |                |             |             |             |             |             |             |             |
|------------------------------|----------------|--------------------|-------------------|----------------|-------------|-------------|-------------|-------------|-------------|-------------|-------------|
| C                            | Miscellaneous  | NULL               | Broadly_distrib   | -none-         | 0,023985783 | 0,739241831 | 24,00101048 | 3,033046746 | 2,19444906  | 2,338778997 | 1,065770466 |
| C                            | Cofactors, Vit | Folate and pterine | 5-FCL-like_prot   | -none-         | 0,025404142 | 0,756751481 | 23,84377704 | 21,47830554 | 5,96505719  | 7,54301658  | 1,264533824 |
| C                            | Cell Wall and  | Capsular and extr  | Algite_metabolis  | -none-         | 0,025536066 | 0,756751481 | 24,12903226 | 16,42657836 | 1,973309656 | 2,063391898 | 1,045650332 |
| C                            | Clustering-ba  | NULL               | CBSS-323097.3     | -none-         | 0,026503694 | 0,767506231 | 27,1965812  | 13,16987191 | 1,910614215 | 1,86833641  | 0,977872139 |
| C                            | Clustering-ba  | Biosynthesis of g  | CBSS-376686.6     | -none-         | 0,026914405 | 0,767506231 | 24,53546864 | 19,19274716 | 23,46825069 | 7,341690441 | 0,31283501  |
| C                            | Respiration    | Electron doting re | NiFe_hydrogese    | -none-         | 0,027393149 | 0,767506231 | 24,02547771 | 19,46425946 | 5,855219218 | 8,145654813 | 1,391178453 |
| C                            | Cofactors, Vit | Tetrapyrroles      | Cobalamin_synt    | -none-         | 0,02809743  | 0,773181071 | 21,63472423 | 11,99652192 | 2,084775648 | 2,470327131 | 1,184936678 |
| C                            | Cell Wall and  | NULL               | YjeE              | -none-         | 0,029623624 | 0,784748549 | 24,12903226 | 19,43422203 | 4,369413565 | 4,081002276 | 0,933993135 |
| C                            | Protein Metab  | Protein biosynthe  | Ribosome_LSU      | -none-         | 0,029987615 | 0,784748549 | 27,71882086 | 24,28186714 | 11,36093854 | 6,947142267 | 0,611493693 |
| C                            | Membrane Tr    | NULL               | Ton_and_Tol_tr    | -none-         | 0,030045532 | 0,784748549 | 23,57493734 | 21,22381985 | 0,975327449 | 1,381790808 | 1,381790808 |
| C                            | Stress Respo   | NULL               | Phage_shock_p     | -none-         | 0,031726998 | 0,814855053 | 20,60473588 | 13,09431152 | 11,64833202 | 4,38757227  | 0,376669575 |
| C                            | Stress Respo   | Oxidative stress   | Rubryerthrin      | -none-         | 0,03308634  | 0,828237685 | 24,12903226 | 16,92265335 | 9,211988313 | 5,365787249 | 0,58247873  |
| C                            | Clustering-ba  | Clustering-based   | CBSS-292415.3     | -none-         | 0,03322996  | 0,828237685 | 23,17691456 | 16,32766324 | 18,86827505 | 13,31882027 | 0,705884361 |
| C                            | Cofactors, Vit | Riboflavin, FMN,   | Flavodoxin        | -none-         | 0,035047266 | 0,843872454 | 25,65       | 23,97942515 | 0,918437194 | 0,967085397 | 0,967085397 |
| C                            | Nucleosides a  | Purines            | De_Novo_Purin     | -none-         | 0,035047266 | 0,843872454 | 25,65       | 23,97942515 | 1,918437194 | 0,967085397 | 0,504100629 |
| C                            | Clustering-ba  | Biosynthesis of g  | CBSS-376686.6     | -none-         | 0,038022686 | 0,873662113 | 24,02547771 | 17,3629247  | 2,91552811  | 2,454440973 | 0,841851246 |
| C                            | Metabolism of  | Peripheral pathwa  | Chlorobenzoate    | -none-         | 0,038528248 | 0,873662113 | 22,6152026  | 14,73117638 | 0,872108019 | 1,180661579 | 1,180661579 |
| C                            | Fatty Acids, L | Isoprenoids        | Carotenoids       | -none-         | 0,038528248 | 0,873662113 | 22,6152026  | 14,73117638 | 0,872108019 | 1,180661579 | 1,180661579 |
| C                            | Cell Wall and  | Capsular and extr  | Capsular_hepto    | -none-         | 0,038923872 | 0,873662113 | 27,53777778 | 25,8771237  | 3,060397521 | 4,827290285 | 1,577340934 |
| C                            | Photosynthes   | Electron transport | Photosystem_I     | -none-         | 0,042525909 | 0,873662113 | 23,66918611 | 19,33964637 | 20,23014766 | 8,560742904 | 0,423167594 |
| C                            | Stress Respo   | Cold shock         | Cold_shock,_Cs    | -none-         | 0,043749128 | 0,873662113 | 24,08931934 | 22,9419361  | 3,016414003 | 2,006660467 | 0,665247033 |
| C                            | Carbohydrate   | Organic acids      | Glycerate_meta    | -none-         | 0,044183669 | 0,873662113 | 26,66666667 | 25,43741693 | 2,126833394 | 3,228602988 | 1,518032864 |
| C                            | Stress Respo   | Oxidative stress   | Glutathione_Nc    | -none-         | 0,044183669 | 0,873662113 | 26,66666667 | 25,43741693 | 1,063416697 | 1,614301494 | 1,518032864 |
| C                            | Iron acquisiti | NULL               | Campylobacter     | -none-         | 0,045067516 | 0,873662113 | 27,30735931 | 24,74650226 | 33,16512327 | 33,32918469 | 1,004946806 |
| C                            | Carbohydrate   | Monosaccharides    | Deoxyribose_an    | -none-         | 0,045200226 | 0,873662113 | 21,17790333 | 10,91722508 | 1,358934615 | 1,74626629  | 1,285025984 |
| C                            | D Metabolism   | NULL               | Type_I_Restrict   | -none-         | 0,04588561  | 0,873662113 | 27,71882086 | 25,04964412 | 2,270222502 | 1,516099304 | 0,667819697 |
| C                            | Stress Respo   | Oxidative stress   | Protection_from   | -none-         | 0,046754827 | 0,873662113 | 23,73006135 | 16,67539462 | 73,5461346  | 31,23672075 | 0,424722807 |
| C                            | Carbohydrate   | Di- and oligosaccl | Lactose_utilizati | -none-         | 0,047109947 | 0,873662113 | 22,79569892 | 12,15643455 | 0,542676395 | 0,637053407 | 0,637053407 |
| C                            | Cofactors, Vit | Folate and pterine | Molybdenum_cc     | -none-         | 0,047109947 | 0,873662113 | 22,79569892 | 12,15643455 | 0,542676395 | 0,637053407 | 0,637053407 |
| C                            | Nucleosides a  | Pyrimidines        | pyrimidine_conv   | -none-         | 0,047109947 | 0,873662113 | 22,79569892 | 12,15643455 | 0,542676395 | 0,637053407 | 0,637053407 |
| C                            | Regulation an  | Programmed Cell    | Phd-Doc,_YdcE     | -none-         | 0,047109947 | 0,873662113 | 22,79569892 | 22,67511649 | 0,460001231 | 0,634065291 | 0,634065291 |
| C                            | Carbohydrate   | CO2 fixation       | CO2_uptake,_c     | -none-         | 0,047109947 | 0,873662113 | 22,79569892 | 22,67511649 | 0,460001231 | 0,634065291 | 0,634065291 |
| C                            | Cell Wall and  | Capsular and extr  | Exopolysacchar    | -none-         | 0,047599911 | 0,873662113 | 23,82608696 | 18,75451172 | 15,02128327 | 8,527802623 | 0,567714653 |
| C                            | Cofactors, Vit | Folate and pterine | YgfZ              | -none-         | 0,047860819 | 0,873662113 | 22,63987241 | 14,6737011  | 1,237753979 | 1,757353677 | 1,419792388 |
| C                            | Photosynthes   | Electron transport | Photosystem_II    | -none-         | 0,047913564 | 0,873662113 | 23,69316394 | 16,1077199  | 3,76840285  | 2,786514221 | 0,739441703 |
| C                            | Cell Wall and  | NULL               | Peptidoglycan_E   | -none-         | 0,048190318 | 0,873662113 | 23,73006135 | 19,96422425 | 5,389070963 | 6,030447081 | 1,119014228 |
| C                            | Miscellaneous  | Plant-Prokaryote   | At1g52510_AT4     | -none-         | 0,049519527 | 0,887320818 | 24,35310498 | 11,75420155 | 2,483546315 | 1,510423277 | 0,608171979 |
| C                            | Amino Acids a  | Arginine; urea cyc | Arginine_Biosyn   | -none-         | 0,050654924 | 0,897232614 | 23,9245283  | 17,39889797 | 5,666514069 | 4,296643792 | 0,758251676 |
| C                            | Protein Metab  | Protein biosynthe  | Translation_tern  | -none-         | 0,051891639 | 0,908693359 | 20,08798646 | 12,88117893 | 12,37767194 | 10,07439176 | 0,813916527 |
| C                            | Clustering-ba  | NULL               | Shikimate_kise    | -none-         | 0,053546595 | 0,913279281 | 24,71784663 | 11,77735221 | 0,814156785 | 0,841264413 | 0,841264413 |
| C                            | Clustering-ba  | NULL               | CBSS-56780.10     | -none-         | 0,053546595 | 0,913279281 | 24,71784663 | 13,01150368 | 0,814042379 | 0,867472354 | 0,867472354 |
| C                            | Respiration    | Electron doting re | Respiratory_def   | -none-         | 0,054375661 | 0,913279281 | 23,9245283  | 16,48535188 | 5,04175549  | 3,319252962 | 0,658352625 |
| <i>L. aestuarii</i> PCC 8106 | -none-         | -none-             | -none-            | hypothetical p | 8,14264E-05 | 0,238045722 | 20,84282669 | 11,10085074 | 174,2656649 | 77,22988218 | 0,443173256 |
| <i>L. aestuarii</i> PCC 8106 | -none-         | -none-             | -none-            | Fatty acid des | 0,00012222  | 0,238045722 | 22,41682852 | 9,732997735 | 130,9591088 | 95,77528225 | 0,731337309 |
| <i>L. aestuarii</i> PCC 8106 | -none-         | -none-             | -none-            | Potassium up   | 0,000179233 | 0,238045722 | 24,87160309 | 12,95054015 | 36,11464519 | 30,2948299  | 0,838851655 |
| <i>L. aestuarii</i> PCC 8106 | -none-         | -none-             | -none-            | hypothetical p | 0,000183368 | 0,238045722 | 22,98020882 | 12,83224961 | 3574,783563 | 2982,4044   | 0,834289503 |
| <i>L. aestuarii</i> PCC 8106 | -none-         | -none-             | -none-            | hypothetical p | 0,000195376 | 0,238045722 | 20,41710828 | 12,80353333 | 4,658366964 | 5,769218609 | 1,238463748 |
| <i>L. aestuarii</i> PCC 8106 | -none-         | -none-             | -none-            | Hydrolase, alr | 0,000235993 | 0,239611853 | 20,0201005  | 12,7943759  | 94,4770215  | 60,96537937 | 0,645293198 |

|                              |                |        |        |                 |             |             |             |             |             |             |             |
|------------------------------|----------------|--------|--------|-----------------|-------------|-------------|-------------|-------------|-------------|-------------|-------------|
| <i>L. aestuarii</i> PCC 8106 | -none-         | -none- | -none- | Peptide meth    | 0,00034495  | 0,300205265 | 20,05387205 | 11,63073097 | 583,386838  | 425,7013194 | 0,72970676  |
| <i>L. aestuarii</i> PCC 8106 | -none-         | -none- | -none- | fibrillin       | 0,000482115 | 0,358925072 | 26,14452214 | 13,44759585 | 142,5599015 | 63,65667545 | 0,44652581  |
| <i>L. aestuarii</i> PCC 8106 | Clustering-ba  | -none- | -none- | Cell division p | 0,000558665 | 0,358925072 | 20,42631153 | 11,17736776 | 147,0165475 | 101,8786301 | 0,692973899 |
| <i>L. aestuarii</i> PCC 8106 | -none-         | -none- | -none- | Endonuclease    | 0,000589174 | 0,358925072 | 22,9181479  | 10,13490517 | 78,99822507 | 54,57670788 | 0,690859925 |
| <i>L. aestuarii</i> PCC 8106 | Fatty Acids, L | -none- | -none- | Phytoene des    | 0,00065693  | 0,363819549 | 22,62470729 | 10,06294045 | 443,9040864 | 253,5971311 | 0,57128812  |
| <i>L. aestuarii</i> PCC 8106 | -none-         | -none- | -none- | 4-hydroxy-3-n   | 0,000748306 | 0,367621624 | 26,02298851 | 11,94671309 | 74,45577452 | 70,69568491 | 0,94949902  |
| <i>L. aestuarii</i> PCC 8106 | -none-         | -none- | -none- | hypothetical p  | 0,000810193 | 0,367621624 | 23,17959957 | 10,14113118 | 132,4228677 | 83,42092194 | 0,629958582 |
| <i>L. aestuarii</i> PCC 8106 | -none-         | -none- | -none- | CsoS1D          | 0,000850894 | 0,367621624 | 22,67918143 | 7,864180301 | 18,21959034 | 14,31113949 | 0,78548086  |
| <i>L. aestuarii</i> PCC 8106 | -none-         | -none- | -none- | Amino acid tra  | 0,000925009 | 0,367621624 | 20,55854819 | 11,85814126 | 1,587360706 | 1,969671519 | 1,240846842 |
| <i>L. aestuarii</i> PCC 8106 | -none-         | -none- | -none- | hypothetical p  | 0,000980093 | 0,367621624 | 22,64506702 | 7,879987022 | 26,05149058 | 26,97108273 | 1,035299022 |
| <i>L. aestuarii</i> PCC 8106 | -none-         | -none- | -none- | predicted prot  | 0,001082439 | 0,367621624 | 20,96564327 | 11,78775018 | 1,863037937 | 2,237373118 | 1,200927299 |
| <i>L. aestuarii</i> PCC 8106 | Carbohydrate   | -none- | -none- | Sorbitol-6-ph   | 0,001114733 | 0,367621624 | 22,95296388 | 10,57930596 | 28,87892988 | 19,8236822  | 0,686441024 |
| <i>L. aestuarii</i> PCC 8106 | -none-         | -none- | -none- | putative hydro  | 0,001146555 | 0,367621624 | 21,48126002 | 11,61300308 | 88,91813876 | 64,90661723 | 0,729959243 |
| <i>L. aestuarii</i> PCC 8106 | Cell Wall and  | -none- | -none- | UDP-N-acetyl    | 0,00121851  | 0,371158078 | 23,31548237 | 9,738442709 | 28,19260193 | 20,31089285 | 0,720433428 |
| <i>L. aestuarii</i> PCC 8106 | -none-         | -none- | -none- | Cytosol amin    | 0,001291217 | 0,372201068 | 22,48471448 | 10,5956921  | 47,09425705 | 31,52012069 | 0,669298608 |
| <i>L. aestuarii</i> PCC 8106 | -none-         | -none- | -none- | Cro-like prote  | 0,001361205 | 0,372201068 | 22,74601643 | 9,477703246 | 156,6087589 | 70,07428205 | 0,447448039 |
| <i>L. aestuarii</i> PCC 8106 | -none-         | -none- | -none- | hypothetical p  | 0,001460369 | 0,372201068 | 20,96564327 | 11,71456138 | 3,179711986 | 3,814873533 | 1,199754427 |
| <i>L. aestuarii</i> PCC 8106 | -none-         | -none- | -none- | hypothetical p  | 0,001495783 | 0,372201068 | 22,88368539 | 5,191370799 | 7,034757399 | 5,372810751 | 0,763752102 |
| <i>L. aestuarii</i> PCC 8106 | -none-         | -none- | -none- | FIG01125970     | 0,001527417 | 0,372201068 | 23,14134223 | 9,190917177 | 19,6514105  | 17,68160232 | 0,899762504 |
| <i>L. aestuarii</i> PCC 8106 | -none-         | -none- | -none- | hypothetical p  | 0,001770058 | 0,40262619  | 23,14134223 | 9,790544532 | 635,2907207 | 244,4051258 | 0,384713829 |
| <i>L. aestuarii</i> PCC 8106 | Carbohydrate   | -none- | -none- | Glucose 1-de    | 0,001784456 | 0,40262619  | 22,81579943 | 8,558978074 | 59,72025742 | 47,58230813 | 0,796753232 |
| <i>L. aestuarii</i> PCC 8106 | -none-         | -none- | -none- | GumJ protein    | 0,00211833  | 0,402629349 | 23,48513436 | 9,930032654 | 6,916628792 | 3,289897984 | 0,475650506 |
| <i>L. aestuarii</i> PCC 8106 | -none-         | -none- | -none- | Methyltransfe   | 0,002206973 | 0,402629349 | 23,12994006 | 5,032485655 | 22,6056063  | 24,1017537  | 1,066184794 |
| <i>L. aestuarii</i> PCC 8106 | -none-         | -none- | -none- | Peptide meth    | 0,002227105 | 0,402629349 | 23,01887975 | 9,169686671 | 421,962611  | 304,1638581 | 0,720831302 |
| <i>L. aestuarii</i> PCC 8106 | -none-         | -none- | -none- | Pentapeptide    | 0,002289288 | 0,402629349 | 22,47602979 | 13,24039614 | 644,1096929 | 535,7111646 | 0,831707969 |
| <i>L. aestuarii</i> PCC 8106 | -none-         | -none- | -none- | Cytoplasmic r   | 0,0023043   | 0,402629349 | 24,98277609 | 13,40037388 | 178,6590878 | 153,6585536 | 0,860065701 |
| <i>L. aestuarii</i> PCC 8106 | -none-         | -none- | -none- | hypothetical p  | 0,002558805 | 0,402629349 | 23,64916863 | 3,424816121 | 119,6813691 | 138,4694598 | 1,156984256 |
| <i>L. aestuarii</i> PCC 8106 | -none-         | -none- | -none- | hypothetical p  | 0,002612003 | 0,402629349 | 22,00377571 | 10,39042565 | 871,9653074 | 348,2969558 | 0,399439006 |
| <i>L. aestuarii</i> PCC 8106 | -none-         | -none- | -none- | ATP synthase    | 0,002621827 | 0,402629349 | 22,95603326 | 9,14862593  | 213,7823669 | 93,72046367 | 0,438391926 |
| <i>L. aestuarii</i> PCC 8106 | -none-         | -none- | -none- | hypothetical p  | 0,002665538 | 0,402629349 | 20,51804185 | 11,51157221 | 100,9479053 | 81,32893881 | 0,805652565 |
| <i>L. aestuarii</i> PCC 8106 | -none-         | -none- | -none- | hypothetical p  | 0,002669327 | 0,402629349 | 26,88065844 | 0,024209121 | 30,73622279 | 35,01085328 | 1,139074685 |
| <i>L. aestuarii</i> PCC 8106 | -none-         | -none- | -none- | hypothetical p  | 0,002731423 | 0,402629349 | 23,38693139 | 9,406764312 | 15,32461818 | 12,60817505 | 0,822739915 |
| <i>L. aestuarii</i> PCC 8106 | -none-         | -none- | -none- | Uncharacteriz   | 0,002816682 | 0,402629349 | 26,98333333 | 10,90197488 | 53,69797592 | 14,09369923 | 0,262462392 |
| <i>L. aestuarii</i> PCC 8106 | -none-         | -none- | -none- | hypothetical p  | 0,002832468 | 0,402629349 | 22,95603326 | 4,789093861 | 4,813992703 | 4,174049257 | 0,867065971 |
| <i>L. aestuarii</i> PCC 8106 | -none-         | -none- | -none- | Aldo/keto red   | 0,002890155 | 0,402629349 | 24,23529412 | 9,387888461 | 36,86708889 | 22,74434759 | 0,616928222 |
| <i>L. aestuarii</i> PCC 8106 | -none-         | -none- | -none- | hypothetical p  | 0,002925024 | 0,402629349 | 23,09440065 | 5,185028906 | 19,27129663 | 11,67244412 | 0,605690647 |
| <i>L. aestuarii</i> PCC 8106 | -none-         | -none- | -none- | Non-specific l  | 0,002996581 | 0,402629349 | 22,9181479  | 9,084108719 | 355,7966696 | 209,8509273 | 0,589805766 |
| <i>L. aestuarii</i> PCC 8106 | -none-         | -none- | -none- | COG0642: Si     | 0,003077529 | 0,402629349 | 23,50198413 | 9,417673662 | 19,15830388 | 10,5247431  | 0,549356726 |
| <i>L. aestuarii</i> PCC 8106 | -none-         | -none- | -none- | hypothetical p  | 0,003098224 | 0,402629349 | 22,74601643 | 8,206967854 | 94,58166045 | 51,08931723 | 0,540160925 |

|                              |                 |        |        |                  |             |             |             |             |             |             |             |
|------------------------------|-----------------|--------|--------|------------------|-------------|-------------|-------------|-------------|-------------|-------------|-------------|
| <i>L. aestuarii</i> PCC 8106 | -none-          | -none- | -none- | Cell division in | 0,003099627 | 0,402629349 | 23,53439002 | 3,26234263  | 23,85371687 | 19,20308682 | 0,805035413 |
| <i>L. aestuarii</i> PCC 8106 | Carbohydrate    | -none- | -none- | Trehalose syr    | 0,0031063   | 0,402629349 | 22,58074009 | 7,860805704 | 91,75785751 | 47,99002633 | 0,523007268 |
| <i>L. aestuarii</i> PCC 8106 | Fatty Acids, L  | -none- | -none- | 1-hydroxy-2-n    | 0,00318717  | 0,404505018 | 22,45060007 | 9,506881242 | 77,49792337 | 52,48502941 | 0,677244333 |
| <i>L. aestuarii</i> PCC 8106 | -none-          | -none- | -none- | Hypothetical p   | 0,003377078 | 0,410038263 | 23,6882599  | 9,73203232  | 10,1722366  | 5,562983732 | 0,546879113 |
| <i>L. aestuarii</i> PCC 8106 | -none-          | -none- | -none- | Putative catio   | 0,003389109 | 0,410038263 | 20,60473588 | 12,80190491 | 576,5062721 | 600,4443002 | 1,041522581 |
| <i>L. aestuarii</i> PCC 8106 | Carbohydrate    | -none- | -none- | Phosphoenolp     | 0,003432691 | 0,410038263 | 20,08798646 | 13,43338014 | 12429,85983 | 8552,938538 | 0,688096137 |
| <i>L. aestuarii</i> PCC 8106 | Amino Acids a   | -none- | -none- | 5-methyltetra    | 0,003501652 | 0,410232002 | 23,0236782  | 7,886929966 | 46,55879147 | 17,75574677 | 0,381361848 |
| <i>L. aestuarii</i> PCC 8106 | -none-          | -none- | -none- | 2-methyl-6-ph    | 0,003710175 | 0,426460171 | 22,27801418 | 10,17589722 | 23,61067999 | 20,55856231 | 0,870731479 |
| <i>L. aestuarii</i> PCC 8106 | Fatty Acids, L  | -none- | -none- | Phosphatidate    | 0,003787685 | 0,427306972 | 22,81579943 | 7,727709578 | 51,76745751 | 27,20193531 | 0,525464    |
| <i>L. aestuarii</i> PCC 8106 | Carbohydrate    | -none- | -none- | High-affnity ca  | 0,004075529 | 0,431286332 | 23,05922574 | 5,139813363 | 12,45969527 | 11,82562322 | 0,949110148 |
| <i>L. aestuarii</i> PCC 8106 | -none-          | -none- | -none- | Ictivated Zn-d   | 0,004106867 | 0,431286332 | 22,98994725 | 10,25138071 | 32,93041177 | 22,50541175 | 0,683423332 |
| <i>L. aestuarii</i> PCC 8106 | -none-          | -none- | -none- | hypothetical p   | 0,004278504 | 0,431286332 | 25,41107206 | 0,599442557 | 56,44207081 | 20,68579745 | 0,366496076 |
| <i>L. aestuarii</i> PCC 8106 | -none-          | -none- | -none- | CAB/ELIP/HL      | 0,004361551 | 0,431286332 | 22,61129547 | 9,785132764 | 364,5798612 | 145,2929445 | 0,398521586 |
| <i>L. aestuarii</i> PCC 8106 | Fatty Acids, L  | -none- | -none- | Acyl carrier pr  | 0,004361652 | 0,431286332 | 22,92012365 | 9,974472752 | 21,69908022 | 11,7566839  | 0,541805633 |
| <i>L. aestuarii</i> PCC 8106 | -none-          | -none- | -none- | expressed pro    | 0,004494367 | 0,431286332 | 24,23529412 | 9,128189304 | 293,4507597 | 181,6092401 | 0,618874663 |
| <i>L. aestuarii</i> PCC 8106 | Cell Division a | -none- | -none- | Circadian inp    | 0,00449629  | 0,431286332 | 24,57142857 | 2,726176011 | 4,720688331 | 3,622685601 | 0,767406223 |
| <i>L. aestuarii</i> PCC 8106 | Regulation an   | -none- | -none- | Two-compone      | 0,004549139 | 0,431286332 | 22,96509268 | 8,532030638 | 213,6399077 | 112,5112398 | 0,52663962  |
| <i>L. aestuarii</i> PCC 8106 | -none-          | -none- | -none- | FIG00564112      | 0,004570785 | 0,431286332 | 24,02547771 | 9,110008598 | 34,57858827 | 25,50058484 | 0,737467494 |
| <i>L. aestuarii</i> PCC 8106 | Nucleosides a   | -none- | -none- | Phosphoribos     | 0,004705416 | 0,431286332 | 23,07865017 | 11,05105949 | 17,40765585 | 12,64405111 | 0,726350016 |
| <i>L. aestuarii</i> PCC 8106 | Carbohydrate    | -none- | -none- | UDP-glucose      | 0,00493363  | 0,431286332 | 20,74385716 | 11,95653796 | 18,04626884 | 13,18539378 | 0,730643763 |
| <i>L. aestuarii</i> PCC 8106 | -none-          | -none- | -none- | hypothetical p   | 0,005084388 | 0,431286332 | 22,88368539 | 6,973210132 | 9,590613593 | 9,102480599 | 0,949103049 |
| <i>L. aestuarii</i> PCC 8106 | Carbohydrate    | -none- | -none- | Phosphoglyce     | 0,005117619 | 0,431286332 | 22,29956331 | 9,696514672 | 40,46624045 | 21,49310921 | 0,531136794 |
| <i>L. aestuarii</i> PCC 8106 | -none-          | -none- | -none- | FIG00870598      | 0,005166632 | 0,431286332 | 25,45938061 | 12,98269447 | 87,54616117 | 64,60758931 | 0,737983122 |
| <i>L. aestuarii</i> PCC 8106 | -none-          | -none- | -none- | hypothetical p   | 0,005252545 | 0,431286332 | 22,98994725 | 5,425334117 | 26,80646714 | 22,93601338 | 0,855614925 |
| <i>L. aestuarii</i> PCC 8106 | -none-          | -none- | -none- | putative phag    | 0,005264609 | 0,431286332 | 23,12994006 | 7,67130696  | 42,54570874 | 20,38667759 | 0,479171183 |
| <i>L. aestuarii</i> PCC 8106 | -none-          | -none- | -none- | hypothetical p   | 0,005371667 | 0,431286332 | 22,85508386 | 3,240381688 | 4,513786107 | 3,035199506 | 0,67242874  |
| <i>L. aestuarii</i> PCC 8106 | Amino Acids a   | -none- | -none- | Homoserine c     | 0,005393312 | 0,431286332 | 22,95296388 | 5,719572591 | 22,49844307 | 14,97728508 | 0,665703179 |
| <i>L. aestuarii</i> PCC 8106 | -none-          | -none- | -none- | hypothetical p   | 0,005400771 | 0,431286332 | 22,61129547 | 6,516520934 | 64,79680394 | 42,47165365 | 0,655459082 |
| <i>L. aestuarii</i> PCC 8106 | -none-          | -none- | -none- | Thymidylate k    | 0,005564917 | 0,431286332 | 22,82959573 | 7,7383527   | 20,96001885 | 19,88781231 | 0,948845154 |
| <i>L. aestuarii</i> PCC 8106 | -none-          | -none- | -none- | FIG00875085      | 0,005577095 | 0,431286332 | 22,95296388 | 5,968713855 | 39,2767579  | 24,08861158 | 0,61330448  |
| <i>L. aestuarii</i> PCC 8106 | -none-          | -none- | -none- | hypothetical p   | 0,005714454 | 0,431286332 | 22,98020882 | 7,718362966 | 178,0849207 | 90,78789345 | 0,509801128 |
| <i>L. aestuarii</i> PCC 8106 | -none-          | -none- | -none- | FIG00556355      | 0,005756995 | 0,431286332 | 23,82608696 | 9,434765669 | 36,21118082 | 22,55812123 | 0,622960111 |
| <i>L. aestuarii</i> PCC 8106 | -none-          | -none- | -none- | Glycosyltrans    | 0,005846946 | 0,431286332 | 22,84957098 | 5,424257441 | 44,97310329 | 45,40350785 | 1,009570266 |
| <i>L. aestuarii</i> PCC 8106 | -none-          | -none- | -none- | Protein of unk   | 0,005847088 | 0,431286332 | 23,3133083  | 5,046483081 | 5,799725271 | 6,992856729 | 1,205722065 |
| <i>L. aestuarii</i> PCC 8106 | -none-          | -none- | -none- | Folate carrier   | 0,005968083 | 0,431286332 | 22,88418321 | 9,682639604 | 61,34201053 | 50,82453035 | 0,828543602 |
| <i>L. aestuarii</i> PCC 8106 | -none-          | -none- | -none- | Putative regul   | 0,006010558 | 0,431286332 | 20,22856621 | 11,62352247 | 59,11613797 | 36,37895824 | 0,615381172 |
| <i>L. aestuarii</i> PCC 8106 | -none-          | -none- | -none- | Uridine phosph   | 0,00628382  | 0,431286332 | 20,22797927 | 13,25290343 | 43,44659261 | 20,74972025 | 0,477591429 |
| <i>L. aestuarii</i> PCC 8106 | -none-          | -none- | -none- | hypothetical p   | 0,006306529 | 0,431286332 | 22,48471448 | 9,554433594 | 42,06764052 | 27,65707178 | 0,657442905 |
| <i>L. aestuarii</i> PCC 8106 | R Metabolism    | -none- | -none- | Protein RtcB     | 0,006314486 | 0,431286332 | 23,88278388 | 10,71698455 | 12,31377556 | 7,017414216 | 0,569883232 |

|                              |                 |        |        |                 |             |             |             |             |             |             |             |
|------------------------------|-----------------|--------|--------|-----------------|-------------|-------------|-------------|-------------|-------------|-------------|-------------|
| <i>L. aestuarii</i> PCC 8106 | Stress Respo    | -none- | -none- | diguanylate c   | 0,006344287 | 0,431286332 | 24,68965517 | 2,809837631 | 18,6852324  | 16,30357402 | 0,872537931 |
| <i>L. aestuarii</i> PCC 8106 | -none-          | -none- | -none- | Peptidyl-proly  | 0,006388748 | 0,431286332 | 24,02547771 | 9,028183724 | 60,00014145 | 37,95495752 | 0,632581134 |
| <i>L. aestuarii</i> PCC 8106 | Cell Division a | -none- | -none- | Circadian clo   | 0,006462726 | 0,431286332 | 22,96509268 | 9,233358439 | 78,7841263  | 55,39156499 | 0,703080273 |
| <i>L. aestuarii</i> PCC 8106 | -none-          | -none- | -none- | hypothetical p  | 0,00647455  | 0,431286332 | 20,89939518 | 12,63673463 | 187,6284976 | 147,0929571 | 0,783958508 |
| <i>L. aestuarii</i> PCC 8106 | Clustering-ba   | -none- | -none- | Polyribonucle   | 0,006490285 | 0,431286332 | 20,90723104 | 11,61322227 | 137,0767158 | 79,97849885 | 0,583457945 |
| <i>L. aestuarii</i> PCC 8106 | -none-          | -none- | -none- | hypothetical p  | 0,00657315  | 0,431286332 | 21,88676717 | 14,16252952 | 32,34435573 | 29,43908474 | 0,910176879 |
| <i>L. aestuarii</i> PCC 8106 | -none-          | -none- | -none- | Haloacid deha   | 0,006703054 | 0,431286332 | 21,29137396 | 11,33841425 | 177,4000764 | 65,48905707 | 0,369160253 |
| <i>L. aestuarii</i> PCC 8106 | -none-          | -none- | -none- | Hypothetical p  | 0,006772616 | 0,431286332 | 23,31121205 | 3,842055462 | 5,685995602 | 6,061340141 | 1,066012105 |
| <i>L. aestuarii</i> PCC 8106 | -none-          | -none- | -none- | hypothetical p  | 0,006812413 | 0,431286332 | 24,12254412 | 2,925255722 | 116,1287273 | 94,87403316 | 0,816972987 |
| <i>L. aestuarii</i> PCC 8106 | -none-          | -none- | -none- | hypothetical p  | 0,006849359 | 0,431286332 | 23,16830248 | 3,773203133 | 315,0430145 | 239,9229504 | 0,761556167 |
| <i>L. aestuarii</i> PCC 8106 | -none-          | -none- | -none- | FIG00873965     | 0,006907298 | 0,431286332 | 23,2021353  | 5,260478448 | 43,73316968 | 33,77033217 | 0,772190363 |
| <i>L. aestuarii</i> PCC 8106 | -none-          | -none- | -none- | Mechanosens     | 0,00696144  | 0,431286332 | 23,80331263 | 10,55468061 | 16,30361405 | 8,487547073 | 0,520592983 |
| <i>L. aestuarii</i> PCC 8106 | -none-          | -none- | -none- | hypothetical p  | 0,007010992 | 0,431286332 | 23,57224037 | 3,324410492 | 6,312061976 | 5,969709048 | 0,945762109 |
| <i>L. aestuarii</i> PCC 8106 | Phosphorus M    | -none- | -none- | Phosphate tra   | 0,007115593 | 0,431286332 | 20,76722533 | 12,93530806 | 49,78017069 | 40,84439163 | 0,820495211 |
| <i>L. aestuarii</i> PCC 8106 | -none-          | -none- | -none- | FIG00871483     | 0,007439031 | 0,431286332 | 22,84957098 | 8,934328143 | 121,8164642 | 48,33685903 | 0,396800706 |
| <i>L. aestuarii</i> PCC 8106 | Cell Division a | -none- | -none- | Circadian inp   | 0,007549056 | 0,431286332 | 23,16584967 | 5,109912567 | 5,061073603 | 5,689486984 | 1,124166023 |
| <i>L. aestuarii</i> PCC 8106 | Protein Metab   | -none- | -none- | Oligopeptidas   | 0,007692504 | 0,431286332 | 23,82608696 | 9,409666443 | 34,7504073  | 21,28275332 | 0,612446155 |
| <i>L. aestuarii</i> PCC 8106 | Cofactors, Vit  | -none- | -none- | 5-nucleotidas   | 0,007703768 | 0,431286332 | 22,88368539 | 5,481738847 | 14,15199205 | 14,64222777 | 1,034640757 |
| <i>L. aestuarii</i> PCC 8106 | Cell Division a | -none- | -none- | Light depende   | 0,007945496 | 0,431286332 | 20,22797927 | 11,11541945 | 278,0524539 | 79,24343922 | 0,284994569 |
| <i>L. aestuarii</i> PCC 8106 | -none-          | -none- | -none- | hypothetical p  | 0,008002297 | 0,431286332 | 22,88368539 | 5,97666047  | 67,82297352 | 60,7762356  | 0,896101018 |
| <i>L. aestuarii</i> PCC 8106 | Nucleosides a   | -none- | -none- | Ribonucleotid   | 0,008046828 | 0,431286332 | 22,71224488 | 5,765102183 | 104,5499072 | 88,45319213 | 0,846037978 |
| <i>L. aestuarii</i> PCC 8106 | -none-          | -none- | -none- | hypothetical p  | 0,008102108 | 0,431286332 | 24,12903226 | 8,032060168 | 248,49929   | 161,3702093 | 0,649378955 |
| <i>L. aestuarii</i> PCC 8106 | -none-          | -none- | -none- | hypothetical p  | 0,008233674 | 0,431286332 | 22,31472783 | 14,17478272 | 79,94052792 | 103,3471393 | 1,292800311 |
| <i>L. aestuarii</i> PCC 8106 | Carbohydrate    | -none- | -none- | High-affnity ca | 0,008308883 | 0,431286332 | 22,95296388 | 7,902515467 | 15,28790454 | 7,931615824 | 0,518816415 |
| <i>L. aestuarii</i> PCC 8106 | Membrane Tr     | -none- | -none- | Twin-arginine   | 0,008339354 | 0,431286332 | 23,13744227 | 8,895683051 | 268,3164559 | 154,1815766 | 0,574625869 |
| <i>L. aestuarii</i> PCC 8106 | -none-          | -none- | -none- | Glycosyl trans  | 0,008365377 | 0,431286332 | 23,13348651 | 4,111509248 | 34,70809483 | 28,70169195 | 0,826945187 |
| <i>L. aestuarii</i> PCC 8106 | -none-          | -none- | -none- | Undecaprenyl    | 0,008445136 | 0,431286332 | 23,09587344 | 7,972251429 | 202,9584414 | 76,66193791 | 0,377722343 |
| <i>L. aestuarii</i> PCC 8106 | -none-          | -none- | -none- | hypothetical p  | 0,008463162 | 0,431286332 | 21,5257732  | 13,27255778 | 165,5315166 | 86,65297761 | 0,523483258 |
| <i>L. aestuarii</i> PCC 8106 | Miscellaneous   | -none- | -none- | Transcription   | 0,008553922 | 0,431286332 | 22,9181479  | 5,187713673 | 19,71746347 | 19,65755675 | 0,996961743 |
| <i>L. aestuarii</i> PCC 8106 | -none-          | -none- | -none- | R-binding pro   | 0,008829744 | 0,431286332 | 22,29956331 | 9,621810577 | 446,8347884 | 258,8267236 | 0,579244791 |
| <i>L. aestuarii</i> PCC 8106 | -none-          | -none- | -none- | Pentapeptide    | 0,008895931 | 0,431286332 | 22,86665133 | 7,828364613 | 12,89725895 | 10,91697674 | 0,846457126 |
| <i>L. aestuarii</i> PCC 8106 | R Metabolism    | -none- | -none- | Thioredoxin re  | 0,008903538 | 0,431286332 | 22,95296388 | 7,003333761 | 6,511897292 | 4,389812697 | 0,674121919 |
| <i>L. aestuarii</i> PCC 8106 | -none-          | -none- | -none- | exopolysacch    | 0,008927053 | 0,431286332 | 21,67436155 | 10,28468326 | 134,7732383 | 62,13054763 | 0,461000629 |
| <i>L. aestuarii</i> PCC 8106 | -none-          | -none- | -none- | Mobile eleme    | 0,008930934 | 0,431286332 | 23,16959663 | 7,713540894 | 218,8058397 | 95,68041534 | 0,43728456  |
| <i>L. aestuarii</i> PCC 8106 | Amino Acids a   | -none- | -none- | Aspartokise (l  | 0,008962781 | 0,431286332 | 26,53041363 | 10,5310596  | 11,65088635 | 8,564607642 | 0,735103527 |
| <i>L. aestuarii</i> PCC 8106 | -none-          | -none- | -none- | Cytosolic Fe-S  | 0,008970444 | 0,431286332 | 22,21027443 | 10,66335315 | 35,15646082 | 25,18840216 | 0,71646581  |
| <i>L. aestuarii</i> PCC 8106 | Phosphorus M    | -none- | -none- | Alkaline phos   | 0,009054282 | 0,431286332 | 20,82587511 | 11,60816091 | 62,14402861 | 48,21802545 | 0,775907622 |
| <i>L. aestuarii</i> PCC 8106 | Cofactors, Vit  | -none- | -none- | Quinolite synt  | 0,009228888 | 0,431286332 | 23,54491018 | 9,328080798 | 161,6464158 | 86,25871895 | 0,53362593  |
| <i>L. aestuarii</i> PCC 8106 | -none-          | -none- | -none- | hypothetical p  | 0,009276215 | 0,431286332 | 23,16584967 | 5,862600183 | 2,676849376 | 2,368614027 | 0,884851441 |

|                              |               |        |        |                 |             |             |             |             |             |             |             |
|------------------------------|---------------|--------|--------|-----------------|-------------|-------------|-------------|-------------|-------------|-------------|-------------|
| <i>L. aestuarii</i> PCC 8106 | -none-        | -none- | -none- | hypothetical p  | 0,00936913  | 0,431286332 | 23,92153923 | 3,060133556 | 627,1864272 | 559,3849092 | 0,891895751 |
| <i>L. aestuarii</i> PCC 8106 | -none-        | -none- | -none- | hypothetical p  | 0,00939982  | 0,431286332 | 20,74888003 | 11,24692974 | 3079,178112 | 2471,037604 | 0,802499081 |
| <i>L. aestuarii</i> PCC 8106 | -none-        | -none- | -none- | hypothetical p  | 0,009418627 | 0,431286332 | 26,74440539 | 12,05283069 | 13,35214804 | 14,06579585 | 1,053448165 |
| <i>L. aestuarii</i> PCC 8106 | Carbohydrate  | -none- | -none- | Methylglyoxal   | 0,009474452 | 0,431286332 | 20,15726496 | 12,90662186 | 16,16151389 | 13,47329174 | 0,833665202 |
| <i>L. aestuarii</i> PCC 8106 | -none-        | -none- | -none- | hypothetical p  | 0,00956366  | 0,431286332 | 23,16584967 | 5,18637626  | 77,14360501 | 44,8468956  | 0,581343011 |
| <i>L. aestuarii</i> PCC 8106 | Carbohydrate  | -none- | -none- | Ribokise (EC    | 0,009693155 | 0,431286332 | 23,09440065 | 5,215143636 | 19,16020612 | 15,32883653 | 0,800035053 |
| <i>L. aestuarii</i> PCC 8106 | -none-        | -none- | -none- | hypothetical p  | 0,009755512 | 0,431286332 | 24,12903226 | 7,570089925 | 11,73901532 | 7,813189807 | 0,665574547 |
| <i>L. aestuarii</i> PCC 8106 | -none-        | -none- | -none- | Succinoglycal   | 0,009787372 | 0,431286332 | 23,02440976 | 5,497188178 | 16,89330881 | 13,67183485 | 0,809304737 |
| <i>L. aestuarii</i> PCC 8106 | Carbohydrate  | -none- | -none- | DH dehydrog     | 0,009915903 | 0,431286332 | 20,74888003 | 11,81161815 | 2,026483218 | 2,552689217 | 1,259664622 |
| <i>L. aestuarii</i> PCC 8106 | -none-        | -none- | -none- | cell surface p  | 0,009937596 | 0,431286332 | 25,0647482  | 1,81121097  | 14,07667785 | 7,00517346  | 0,497643942 |
| <i>L. aestuarii</i> PCC 8106 | -none-        | -none- | -none- | Membrane G      | 0,00994444  | 0,431286332 | 23,12994006 | 5,067346324 | 27,27088199 | 25,47273672 | 0,934063545 |
| <i>L. aestuarii</i> PCC 8106 | -none-        | -none- | -none- | Secreted and    | 0,010047375 | 0,431286332 | 20,33684211 | 13,31675981 | 4962,105458 | 4650,709353 | 0,937245166 |
| <i>L. aestuarii</i> PCC 8106 | -none-        | -none- | -none- | Mannose-1-p     | 0,010092352 | 0,431286332 | 23,09440065 | 5,142831055 | 11,17099272 | 7,781810821 | 0,696608709 |
| <i>L. aestuarii</i> PCC 8106 | -none-        | -none- | -none- | hypothetical p  | 0,010185212 | 0,431286332 | 23,72555044 | 3,393375292 | 90,90796691 | 85,78297991 | 0,943624446 |
| <i>L. aestuarii</i> PCC 8106 | -none-        | -none- | -none- | FIG139438: li   | 0,010313018 | 0,431286332 | 24,02547771 | 5,02663807  | 20,03818768 | 18,22143733 | 0,909335596 |
| <i>L. aestuarii</i> PCC 8106 | Stress Respo  | -none- | -none- | Serine-proteir  | 0,010381473 | 0,431286332 | 24,12903226 | 7,810433767 | 37,16212379 | 27,75336494 | 0,746818591 |
| <i>L. aestuarii</i> PCC 8106 | -none-        | -none- | -none- | FIG00662554     | 0,010393185 | 0,431286332 | 23,82608696 | 8,049169357 | 33,29071622 | 22,95294134 | 0,689469737 |
| <i>L. aestuarii</i> PCC 8106 | -none-        | -none- | -none- | conserved hy    | 0,010410642 | 0,431286332 | 23,12994006 | 5,078763721 | 31,20515259 | 23,39797905 | 0,749811397 |
| <i>L. aestuarii</i> PCC 8106 | -none-        | -none- | -none- | BioD-like N-te  | 0,010459968 | 0,431286332 | 20,15726496 | 10,85404878 | 83,04837697 | 52,00446729 | 0,626194866 |
| <i>L. aestuarii</i> PCC 8106 | -none-        | -none- | -none- | serine/threoni  | 0,010570661 | 0,431286332 | 22,35690236 | 10,80108771 | 7,511093933 | 3,86617638  | 0,514728802 |
| <i>L. aestuarii</i> PCC 8106 | -none-        | -none- | -none- | hypothetical p  | 0,010596308 | 0,431286332 | 22,74601643 | 14,40134671 | 14,64112854 | 9,321336196 | 0,636654215 |
| <i>L. aestuarii</i> PCC 8106 | -none-        | -none- | -none- | hypothetical p  | 0,010736489 | 0,431286332 | 25,30759994 | 13,29015571 | 41,21676352 | 35,21817461 | 0,854462398 |
| <i>L. aestuarii</i> PCC 8106 | -none-        | -none- | -none- | hypothetical p  | 0,010738748 | 0,431286332 | 23,57625492 | 5,071481818 | 116,1776874 | 95,2146786  | 0,819560801 |
| <i>L. aestuarii</i> PCC 8106 | Cell Wall and | -none- | -none- | ADP-heptose     | 0,010745604 | 0,431286332 | 23,13254103 | 9,042435186 | 278,0307599 | 113,5206664 | 0,408302543 |
| <i>L. aestuarii</i> PCC 8106 | Regulation an | -none- | -none- | Hydrolase, alp  | 0,010758537 | 0,431286332 | 24,02547771 | 7,864617258 | 28,16571579 | 22,1702553  | 0,787136228 |
| <i>L. aestuarii</i> PCC 8106 | Carbohydrate  | -none- | -none- | Succinyl-CoA    | 0,010801652 | 0,431286332 | 23,64944276 | 9,76764219  | 26,38961319 | 19,04633005 | 0,721735856 |
| <i>L. aestuarii</i> PCC 8106 | Photosynthes  | -none- | -none- | Photosystem     | 0,010833788 | 0,431286332 | 22,84957098 | 7,809003171 | 1148,588161 | 413,4310298 | 0,359947145 |
| <i>L. aestuarii</i> PCC 8106 | -none-        | -none- | -none- | hypothetical p  | 0,01088676  | 0,431286332 | 23,23880289 | 4,948610618 | 132,8978867 | 141,4194849 | 1,064121397 |
| <i>L. aestuarii</i> PCC 8106 | -none-        | -none- | -none- | Slr0250 prote   | 0,011094921 | 0,431286332 | 23,16584967 | 5,119957786 | 60,45054765 | 62,41380402 | 1,032477065 |
| <i>L. aestuarii</i> PCC 8106 | Carbohydrate  | -none- | -none- | High-affnity ca | 0,011123174 | 0,431286332 | 22,9181479  | 5,894625424 | 9,737358193 | 8,992154266 | 0,923469599 |
| <i>L. aestuarii</i> PCC 8106 | Carbohydrate  | -none- | -none- | High-affnity ca | 0,011227772 | 0,431286332 | 23,2390168  | 5,09859561  | 13,92848585 | 15,33660599 | 1,101096426 |
| <i>L. aestuarii</i> PCC 8106 | -none-        | -none- | -none- | Mobile eleme    | 0,011378774 | 0,431286332 | 21,4434609  | 2,942976704 | 139,1780074 | 107,0697621 | 0,769300869 |
| <i>L. aestuarii</i> PCC 8106 | Photosynthes  | -none- | -none- | Cytochrome b    | 0,011384216 | 0,431286332 | 23,82608696 | 9,14971881  | 572,4870472 | 335,2636825 | 0,585626669 |
| <i>L. aestuarii</i> PCC 8106 | -none-        | -none- | -none- | FIG00562458     | 0,011400746 | 0,431286332 | 22,88368539 | 5,326117466 | 10,32953248 | 9,661054304 | 0,93528476  |
| <i>L. aestuarii</i> PCC 8106 | -none-        | -none- | -none- | FIG056164: ri   | 0,011510786 | 0,431286332 | 22,19235268 | 14,16593869 | 362,7233527 | 350,6170355 | 0,966623828 |
| <i>L. aestuarii</i> PCC 8106 | -none-        | -none- | -none- | Phage shock     | 0,011640085 | 0,431286332 | 22,74845993 | 7,602389858 | 15,69840882 | 9,730412615 | 0,619834324 |
| <i>L. aestuarii</i> PCC 8106 | Cell Wall and | -none- | -none- | UDP-glucose     | 0,011771211 | 0,431286332 | 24,02547771 | 7,666185509 | 76,48037908 | 49,53798863 | 0,647721536 |
| <i>L. aestuarii</i> PCC 8106 | -none-        | -none- | -none- | Transglutamis   | 0,011784266 | 0,431286332 | 22,95296388 | 5,65932965  | 24,08626868 | 17,39895657 | 0,72235998  |
| <i>L. aestuarii</i> PCC 8106 | -none-        | -none- | -none- | hypothetical p  | 0,011794712 | 0,431286332 | 20,37389771 | 12,3091503  | 225,948721  | 212,7338626 | 0,941513905 |

|                              |                |        |        |                 |             |             |             |             |             |             |             |
|------------------------------|----------------|--------|--------|-----------------|-------------|-------------|-------------|-------------|-------------|-------------|-------------|
| <i>L. aestuarii</i> PCC 8106 | -none-         | -none- | -none- | ATP-depende     | 0,011822953 | 0,431286332 | 25,00251944 | 11,89902993 | 46,87187722 | 30,13743659 | 0,642974815 |
| <i>L. aestuarii</i> PCC 8106 | -none-         | -none- | -none- | Fe-S oxidore    | 0,011942348 | 0,431286332 | 24,02547771 | 7,062267169 | 14,64051507 | 9,055904517 | 0,618550951 |
| <i>L. aestuarii</i> PCC 8106 | Regulation an  | -none- | -none- | Membrane-as     | 0,011974269 | 0,431286332 | 24,02547771 | 6,924382375 | 89,99671237 | 63,33734652 | 0,703774003 |
| <i>L. aestuarii</i> PCC 8106 | -none-         | -none- | -none- | DPH depende     | 0,011984608 | 0,431286332 | 23,28030746 | 3,763883839 | 72,54272597 | 70,92255552 | 0,977665983 |
| <i>L. aestuarii</i> PCC 8106 | -none-         | -none- | -none- | COGs COG3       | 0,01210503  | 0,431286332 | 24,12903226 | 7,367352342 | 21,05771079 | 17,06580384 | 0,810430156 |
| <i>L. aestuarii</i> PCC 8106 | Cofactors, Vit | -none- | -none- | Lipoate-protei  | 0,012177092 | 0,431286332 | 23,82608696 | 8,948508831 | 69,76482331 | 38,52379186 | 0,552195075 |
| <i>L. aestuarii</i> PCC 8106 | -none-         | -none- | -none- | Kinesin light c | 0,012271287 | 0,431286332 | 23,31548237 | 3,945844855 | 2,324630246 | 2,508221124 | 1,078976378 |
| <i>L. aestuarii</i> PCC 8106 | -none-         | -none- | -none- | 2'-O-glycosylt  | 0,012356559 | 0,431286332 | 23,82608696 | 9,831249412 | 57,73112897 | 30,57867334 | 0,529673919 |
| <i>L. aestuarii</i> PCC 8106 | -none-         | -none- | -none- | Glycosyltrans   | 0,012396625 | 0,431286332 | 20,64468864 | 12,79381044 | 22,24320477 | 23,10502889 | 1,038745501 |
| <i>L. aestuarii</i> PCC 8106 | -none-         | -none- | -none- | hypothetical p  | 0,012444059 | 0,431286332 | 24,02547771 | 7,398490343 | 12,70698835 | 11,05785969 | 0,870218763 |
| <i>L. aestuarii</i> PCC 8106 | -none-         | -none- | -none- | FIG003737: F    | 0,012608387 | 0,431286332 | 24,2450808  | 2,766286965 | 20,79978376 | 14,75372722 | 0,709321183 |
| <i>L. aestuarii</i> PCC 8106 | -none-         | -none- | -none- | integrase/rec   | 0,012679492 | 0,431286332 | 24,12903226 | 4,784122991 | 26,6591113  | 26,78470519 | 1,004711106 |
| <i>L. aestuarii</i> PCC 8106 | -none-         | -none- | -none- | hypothetical p  | 0,012847696 | 0,431286332 | 22,88368539 | 9,526145326 | 15,02894603 | 12,25580849 | 0,815480238 |
| <i>L. aestuarii</i> PCC 8106 | Amino Acids a  | -none- | -none- | S-adenosylme    | 0,012926015 | 0,431286332 | 23,64944276 | 3,469329864 | 123,0160856 | 136,3186914 | 1,108137125 |
| <i>L. aestuarii</i> PCC 8106 | -none-         | -none- | -none- | hypothetical p  | 0,013087517 | 0,431286332 | 23,42808691 | 5,039774702 | 60,46670764 | 35,74006901 | 0,591070201 |
| <i>L. aestuarii</i> PCC 8106 | -none-         | -none- | -none- | hypothetical p  | 0,013131063 | 0,431286332 | 20,62992675 | 11,40458164 | 3,20144131  | 4,073332342 | 1,272343282 |
| <i>L. aestuarii</i> PCC 8106 | -none-         | -none- | -none- | Mobile eleme    | 0,013169311 | 0,431286332 | 24,02547771 | 7,825742932 | 51,32283362 | 27,40242434 | 0,53392267  |
| <i>L. aestuarii</i> PCC 8106 | -none-         | -none- | -none- | hypothetical p  | 0,013218154 | 0,431286332 | 23,02440976 | 5,850950618 | 61,824785   | 41,91340233 | 0,677938505 |
| <i>L. aestuarii</i> PCC 8106 | Phosphorus M   | -none- | -none- | Alkaline phos   | 0,013242665 | 0,431286332 | 21,63350785 | 12,93088715 | 150,2362843 | 134,8487479 | 0,897577762 |
| <i>L. aestuarii</i> PCC 8106 | -none-         | -none- | -none- | acyltransferas  | 0,013330776 | 0,431286332 | 22,9181479  | 5,65632026  | 5,71362941  | 5,839696942 | 1,022064352 |
| <i>L. aestuarii</i> PCC 8106 | -none-         | -none- | -none- | hypothetical p  | 0,013415002 | 0,431286332 | 22,85508386 | 13,43477025 | 59,1957458  | 52,24365404 | 0,882557578 |
| <i>L. aestuarii</i> PCC 8106 | -none-         | -none- | -none- | IMP cyclohyd    | 0,013515334 | 0,431286332 | 22,35492656 | 11,80458747 | 6,923169247 | 5,214623558 | 0,753213358 |
| <i>L. aestuarii</i> PCC 8106 | -none-         | -none- | -none- | FOG: WD40 r     | 0,013516815 | 0,431286332 | 23,9245283  | 5,726719686 | 71,7322759  | 52,26033707 | 0,728547037 |
| <i>L. aestuarii</i> PCC 8106 | -none-         | -none- | -none- | Ubiquinone/m    | 0,013553011 | 0,431286332 | 23,31548237 | 3,819348369 | 31,92645676 | 28,51455091 | 0,893132336 |
| <i>L. aestuarii</i> PCC 8106 | Amino Acids a  | -none- | -none- | Urea ABC tra    | 0,013624206 | 0,431286332 | 22,9181479  | 6,773970224 | 43,66204006 | 39,1681683  | 0,897076001 |
| <i>L. aestuarii</i> PCC 8106 | R Metabolism   | -none- | -none- | S-adenosylme    | 0,013674551 | 0,431286332 | 24,37006221 | 2,685732758 | 269,0192778 | 203,2339982 | 0,755462582 |
| <i>L. aestuarii</i> PCC 8106 | Carbohydrate   | -none- | -none- | High-affnity c  | 0,01395913  | 0,431286332 | 27,2516129  | 27,23469873 | 14,35494952 | 10,61235038 | 0,739281623 |
| <i>L. aestuarii</i> PCC 8106 | Stress Respo   | -none- | -none- | Translation el  | 0,013983662 | 0,431286332 | 22,62470729 | 10,11383567 | 107,3582557 | 51,39628454 | 0,478736211 |
| <i>L. aestuarii</i> PCC 8106 | -none-         | -none- | -none- | possible heat   | 0,01399368  | 0,431286332 | 24,12903226 | 7,217913738 | 23,59444283 | 18,2373328  | 0,772950348 |
| <i>L. aestuarii</i> PCC 8106 | -none-         | -none- | -none- | SAM-depende     | 0,013993836 | 0,431286332 | 24,02547771 | 5,017779321 | 11,56521794 | 11,32925515 | 0,979597204 |
| <i>L. aestuarii</i> PCC 8106 | -none-         | -none- | -none- | hypothetical p  | 0,014031885 | 0,431286332 | 25,99105238 | 12,62361085 | 50,99191175 | 19,05361477 | 0,373659549 |
| <i>L. aestuarii</i> PCC 8106 | -none-         | -none- | -none- | hypothetical p  | 0,014051206 | 0,431286332 | 27,30735931 | 25,70369711 | 32,62048558 | 39,93091866 | 1,224105587 |
| <i>L. aestuarii</i> PCC 8106 | Protein Metab  | -none- | -none- | SSU ribosom     | 0,014059093 | 0,431286332 | 23,9245283  | 7,217282397 | 244,0602177 | 132,1982548 | 0,541662447 |
| <i>L. aestuarii</i> PCC 8106 | -none-         | -none- | -none- | FIG00871004     | 0,014061677 | 0,431286332 | 26,26950355 | 0,701218381 | 230,2281662 | 111,6346662 | 0,484887093 |
| <i>L. aestuarii</i> PCC 8106 | -none-         | -none- | -none- | Transposase     | 0,014192577 | 0,431286332 | 22,80807553 | 8,060731769 | 55,21013979 | 30,73953723 | 0,5567734   |
| <i>L. aestuarii</i> PCC 8106 | -none-         | -none- | -none- | hypothetical p  | 0,014249179 | 0,431286332 | 22,98994725 | 4,185249104 | 37,07129891 | 36,07846806 | 0,973218342 |
| <i>L. aestuarii</i> PCC 8106 | -none-         | -none- | -none- | FIG00870681     | 0,014406699 | 0,431286332 | 23,16830248 | 3,97383474  | 2,606453806 | 2,61054571  | 1,001569912 |
| <i>L. aestuarii</i> PCC 8106 | Stress Respo   | -none- | -none- | diguanylate c   | 0,014470465 | 0,431286332 | 23,49849272 | 5,009469853 | 30,95842316 | 24,47032972 | 0,790425584 |
| <i>L. aestuarii</i> PCC 8106 | -none-         | -none- | -none- | hypothetical p  | 0,014537785 | 0,431286332 | 23,16584967 | 19,80548231 | 4,492829627 | 6,27623506  | 1,396944817 |

|                              |                 |        |        |                 |             |             |             |             |             |             |             |
|------------------------------|-----------------|--------|--------|-----------------|-------------|-------------|-------------|-------------|-------------|-------------|-------------|
| <i>L. aestuarii</i> PCC 8106 | -none-          | -none- | -none- | FIG01189787     | 0,014789215 | 0,431286332 | 24,12903226 | 7,394012204 | 54,42293681 | 29,12940734 | 0,535241371 |
| <i>L. aestuarii</i> PCC 8106 | Photosynthes    | -none- | -none- | Photosystem     | 0,014875851 | 0,431286332 | 24,23529412 | 7,890833036 | 159,1859452 | 62,21590493 | 0,390837928 |
| <i>L. aestuarii</i> PCC 8106 | Carbohydrate    | -none- | -none- | High-affnity ca | 0,015071831 | 0,431286332 | 23,9245283  | 7,605772849 | 26,23841124 | 18,38430797 | 0,700663916 |
| <i>L. aestuarii</i> PCC 8106 | -none-          | -none- | -none- | hypothetical p  | 0,015141306 | 0,431286332 | 23,09440065 | 5,726310824 | 57,25751904 | 46,23556472 | 0,807502062 |
| <i>L. aestuarii</i> PCC 8106 | -none-          | -none- | -none- | hypothetical p  | 0,015146745 | 0,431286332 | 26,31871646 | 12,64085279 | 3,207544621 | 3,621856431 | 1,129167902 |
| <i>L. aestuarii</i> PCC 8106 | -none-          | -none- | -none- | hypothetical p  | 0,015148181 | 0,431286332 | 23,09440065 | 5,235399773 | 13,07469859 | 15,00168558 | 1,147382899 |
| <i>L. aestuarii</i> PCC 8106 | -none-          | -none- | -none- | hypothetical p  | 0,015231641 | 0,431286332 | 22,95583284 | 5,768164378 | 40,50843772 | 28,81200034 | 0,711259233 |
| <i>L. aestuarii</i> PCC 8106 | Respiration     | -none- | -none- | DH dehydrog     | 0,015361341 | 0,431286332 | 23,2390168  | 5,097395125 | 41,96643134 | 35,15881527 | 0,837784251 |
| <i>L. aestuarii</i> PCC 8106 | Regulation an   | -none- | -none- | Adenylate cyc   | 0,015362259 | 0,431286332 | 26,39808153 | 0,593938137 | 5,268674207 | 4,833199369 | 0,91734641  |
| <i>L. aestuarii</i> PCC 8106 | -none-          | -none- | -none- | RTX toxins ar   | 0,015364399 | 0,431286332 | 27,42105263 | 27,31727196 | 27,84534146 | 25,63025873 | 0,920450509 |
| <i>L. aestuarii</i> PCC 8106 | -none-          | -none- | -none- | hypothetical p  | 0,015399333 | 0,431286332 | 22,98994725 | 6,494500576 | 36,04282837 | 23,62842527 | 0,655565236 |
| <i>L. aestuarii</i> PCC 8106 | -none-          | -none- | -none- | DUF324 dom      | 0,015462995 | 0,431286332 | 23,9245283  | 7,905164835 | 4,520674241 | 5,263345314 | 1,164283254 |
| <i>L. aestuarii</i> PCC 8106 | -none-          | -none- | -none- | Epoxide hydro   | 0,015701567 | 0,431286332 | 24,02547771 | 7,514810468 | 19,93781317 | 16,52434883 | 0,828794446 |
| <i>L. aestuarii</i> PCC 8106 | Cell Division a | -none- | -none- | Circadian inp   | 0,015818347 | 0,431286332 | 23,05922574 | 5,448179499 | 14,53236757 | 10,44583834 | 0,71879811  |
| <i>L. aestuarii</i> PCC 8106 | Fatty Acids, L  | -none- | -none- | 3-oxoacyl-[ac   | 0,015885268 | 0,431286332 | 27,42105263 | 27,3668656  | 14,13195138 | 13,48345516 | 0,954111347 |
| <i>L. aestuarii</i> PCC 8106 | -none-          | -none- | -none- | hypothetical p  | 0,015894217 | 0,431286332 | 20,0201005  | 11,69126812 | 488,9082676 | 424,2628593 | 0,867775997 |
| <i>L. aestuarii</i> PCC 8106 | Carbohydrate    | -none- | -none- | High-affnity ca | 0,016164424 | 0,431286332 | 24,12903226 | 7,51150679  | 5,714819991 | 4,486573206 | 0,785076908 |
| <i>L. aestuarii</i> PCC 8106 | -none-          | -none- | -none- | Ribosome rec    | 0,016270401 | 0,431286332 | 20,75638412 | 10,81921811 | 350,6309587 | 164,3938047 | 0,468851368 |
| <i>L. aestuarii</i> PCC 8106 | Cofactors, Vit  | -none- | -none- | Sirohydrochlo   | 0,016347199 | 0,431286332 | 23,09440065 | 5,422913864 | 197,7394236 | 164,7905736 | 0,833372378 |
| <i>L. aestuarii</i> PCC 8106 | -none-          | -none- | -none- | D-alanyl-D-ala  | 0,016360538 | 0,431286332 | 24,12903226 | 4,917910961 | 14,8742653  | 11,75455998 | 0,790261552 |
| <i>L. aestuarii</i> PCC 8106 | Photosynthes    | -none- | -none- | photosystem     | 0,016405545 | 0,431286332 | 20,26388889 | 11,38218139 | 3551,765619 | 1490,064487 | 0,41952782  |
| <i>L. aestuarii</i> PCC 8106 | Carbohydrate    | -none- | -none- | Cytoplasmic a   | 0,016465046 | 0,431286332 | 24,12903226 | 5,35038346  | 9,248573474 | 7,466539657 | 0,80731798  |
| <i>L. aestuarii</i> PCC 8106 | Photosynthes    | -none- | -none- | Phycobilisome   | 0,016589302 | 0,431286332 | 20,19243986 | 12,71248318 | 2313,183877 | 1934,948426 | 0,83648708  |
| <i>L. aestuarii</i> PCC 8106 | Regulation an   | -none- | -none- | Adenylate cyc   | 0,016607769 | 0,431286332 | 22,71224488 | 6,664845293 | 4,99451384  | 3,834030288 | 0,767648346 |
| <i>L. aestuarii</i> PCC 8106 | Amino Acids a   | -none- | -none- | Tryptophan sy   | 0,016767968 | 0,431286332 | 23,9245283  | 7,918695089 | 97,24427888 | 52,82982885 | 0,543269275 |
| <i>L. aestuarii</i> PCC 8106 | Membrane Tr     | -none- | -none- | Type IV fimbr   | 0,016804746 | 0,431286332 | 22,24473695 | 10,62760114 | 13,06823527 | 13,43871817 | 1,02834988  |
| <i>L. aestuarii</i> PCC 8106 | -none-          | -none- | -none- | TPR-repeat p    | 0,016852311 | 0,431286332 | 23,03113803 | 4,237408167 | 55,22456212 | 50,17016535 | 0,908475566 |
| <i>L. aestuarii</i> PCC 8106 | Clustering-ba   | -none- | -none- | Cell division p | 0,016898824 | 0,431286332 | 24,02547771 | 7,124764978 | 74,35976448 | 43,53635424 | 0,585482681 |
| <i>L. aestuarii</i> PCC 8106 | -none-          | -none- | -none- | hypothetical p  | 0,016918355 | 0,431286332 | 22,95296388 | 5,666868442 | 466,2546131 | 312,5163037 | 0,670269623 |
| <i>L. aestuarii</i> PCC 8106 | Respiration     | -none- | -none- | D(P)H-quinon    | 0,017036786 | 0,431286332 | 23,9245283  | 7,702823909 | 126,5677974 | 113,2044489 | 0,894417468 |
| <i>L. aestuarii</i> PCC 8106 | -none-          | -none- | -none- | 3-oxoacyl-[ac   | 0,017056162 | 0,431286332 | 22,73357012 | 9,129865798 | 101,7196239 | 33,12000792 | 0,325600967 |
| <i>L. aestuarii</i> PCC 8106 | -none-          | -none- | -none- | hypothetical p  | 0,017100064 | 0,431286332 | 23,76766936 | 3,367616283 | 22,97235756 | 31,29600657 | 1,362333252 |
| <i>L. aestuarii</i> PCC 8106 | R Metabolism    | -none- | -none- | Thioredoxin re  | 0,017123668 | 0,431286332 | 23,9245283  | 7,674449864 | 67,06788303 | 24,68477577 | 0,368056582 |
| <i>L. aestuarii</i> PCC 8106 | -none-          | -none- | -none- | hypothetical p  | 0,017215696 | 0,431286332 | 20,44919786 | 13,5613402  | 1331,685274 | 949,0745905 | 0,712686856 |
| <i>L. aestuarii</i> PCC 8106 | -none-          | -none- | -none- | hypothetical p  | 0,017232957 | 0,431286332 | 20,41134752 | 11,90923483 | 538,3358555 | 315,9676447 | 0,586934051 |
| <i>L. aestuarii</i> PCC 8106 | D Metabolism    | -none- | -none- | D gyrase sub    | 0,017338119 | 0,431286332 | 22,84957098 | 5,968060594 | 51,31102837 | 35,00473311 | 0,682206812 |
| <i>L. aestuarii</i> PCC 8106 | -none-          | -none- | -none- | hypothetical p  | 0,017377551 | 0,431286332 | 25,3935187  | 10,17013853 | 36,43839456 | 24,11243971 | 0,661731671 |
| <i>L. aestuarii</i> PCC 8106 | -none-          | -none- | -none- | secreted prote  | 0,017513312 | 0,431286332 | 22,81631273 | 2,963952542 | 8,944965298 | 3,206378086 | 0,358456179 |
| <i>L. aestuarii</i> PCC 8106 | -none-          | -none- | -none- | hypothetical p  | 0,017582801 | 0,431286332 | 23,27585849 | 5,290322936 | 157,8527542 | 122,6762198 | 0,77715603  |

|                              |                 |        |        |                        |             |             |             |             |             |             |             |
|------------------------------|-----------------|--------|--------|------------------------|-------------|-------------|-------------|-------------|-------------|-------------|-------------|
| <i>L. aestuarii</i> PCC 8106 | -none-          | -none- | -none- | hypothetical p         | 0,017642828 | 0,431286332 | 23,71094955 | 8,750150159 | 20,39721988 | 6,603594175 | 0,323749718 |
| <i>L. aestuarii</i> PCC 8106 | -none-          | -none- | -none- | L-fuco-beta-p          | 0,017694697 | 0,431286332 | 22,9181479  | 9,661621812 | 75,60898927 | 29,35840956 | 0,388292581 |
| <i>L. aestuarii</i> PCC 8106 | Amino Acids a   | -none- | -none- | Serine hydrox          | 0,017722598 | 0,431286332 | 24,02547771 | 7,259225456 | 116,2734839 | 50,49468422 | 0,434275146 |
| <i>L. aestuarii</i> PCC 8106 | -none-          | -none- | -none- | hypothetical p         | 0,017800556 | 0,431286332 | 23,05922574 | 5,286113253 | 14,18560908 | 15,2840406  | 1,077432807 |
| <i>L. aestuarii</i> PCC 8106 | -none-          | -none- | -none- | probable glyco         | 0,017832684 | 0,431286332 | 23,73006135 | 9,040134115 | 11,08696099 | 11,59483678 | 1,045808386 |
| <i>L. aestuarii</i> PCC 8106 | Virulence, Dis  | -none- | -none- | Probable Co/           | 0,017952819 | 0,431286332 | 22,98994725 | 5,362572916 | 6,77518144  | 5,029800376 | 0,742386078 |
| <i>L. aestuarii</i> PCC 8106 | -none-          | -none- | -none- | Retron-type R          | 0,017953548 | 0,431286332 | 23,13348651 | 3,825534069 | 95,49936852 | 73,52951591 | 0,769947666 |
| <i>L. aestuarii</i> PCC 8106 | -none-          | -none- | -none- | ABC transpor           | 0,017959132 | 0,431286332 | 23,9245283  | 8,034868008 | 20,97425939 | 20,47961608 | 0,976416649 |
| <i>L. aestuarii</i> PCC 8106 | Amino Acids a   | -none- | -none- | Lysine decarb          | 0,017984079 | 0,431286332 | 23,23880289 | 7,365695044 | 3,80066376  | 3,581447143 | 0,942321491 |
| <i>L. aestuarii</i> PCC 8106 | -none-          | -none- | -none- | hypothetical p         | 0,018022105 | 0,431286332 | 20,08798646 | 13,58849985 | 16,74780032 | 12,7834287  | 0,763290012 |
| <i>L. aestuarii</i> PCC 8106 | Respiration     | -none- | -none- | Putative subu          | 0,018078831 | 0,431286332 | 24,02547771 | 6,886744049 | 78,17491431 | 49,21252293 | 0,629518092 |
| <i>L. aestuarii</i> PCC 8106 | D Metabolism    | -none- | -none- | ATP-depende            | 0,018255492 | 0,431286332 | 24,02547771 | 5,112851132 | 7,658925373 | 7,874857108 | 1,028193477 |
| <i>L. aestuarii</i> PCC 8106 | -none-          | -none- | -none- | Osmotically ir         | 0,01827674  | 0,431286332 | 21,82078853 | 12,90940715 | 62,86034277 | 62,64931137 | 0,996642853 |
| <i>L. aestuarii</i> PCC 8106 | Cell Division a | -none- | -none- | Circadian inp          | 0,018297207 | 0,431286332 | 23,82608696 | 7,497586374 | 6,041593289 | 4,864520565 | 0,805171804 |
| <i>L. aestuarii</i> PCC 8106 | -none-          | -none- | -none- | transposase            | 0,01836329  | 0,431286332 | 23,02898648 | 9,187764244 | 131,9703285 | 38,37889848 | 0,290814601 |
| <i>L. aestuarii</i> PCC 8106 | Carbohydrate    | -none- | -none- | Aldehyde deh           | 0,018426286 | 0,431286332 | 26,26950355 | 8,592095939 | 17,07235016 | 10,8012359  | 0,632674225 |
| <i>L. aestuarii</i> PCC 8106 | Respiration     | -none- | -none- | ATP synthase           | 0,01846682  | 0,431286332 | 23,46649546 | 7,871803831 | 235,1267554 | 128,7422587 | 0,547544062 |
| <i>L. aestuarii</i> PCC 8106 | R Metabolism    | -none- | -none- | Ribonuclease           | 0,018481966 | 0,431286332 | 23,06490958 | 9,236126886 | 106,1324866 | 43,2598321  | 0,407602172 |
| <i>L. aestuarii</i> PCC 8106 | -none-          | -none- | -none- | ISSoc12, tran          | 0,018542169 | 0,431286332 | 20,23867974 | 10,69466899 | 494,5823872 | 177,473713  | 0,35883549  |
| <i>L. aestuarii</i> PCC 8106 | -none-          | -none- | -none- | FIG00875611            | 0,018571061 | 0,431286332 | 20,30017452 | 11,60729077 | 348,583244  | 332,6772854 | 0,954369698 |
| <i>L. aestuarii</i> PCC 8106 | -none-          | -none- | -none- | 6,7-dimethyl- $\delta$ | 0,018607379 | 0,431286332 | 23,3133083  | 5,392978282 | 40,93506328 | 36,95190301 | 0,902695637 |
| <i>L. aestuarii</i> PCC 8106 | Cell Wall and   | -none- | -none- | Glucose-1-ph           | 0,018611786 | 0,431286332 | 24,02547771 | 7,411470944 | 52,052132   | 46,25779636 | 0,888682069 |
| <i>L. aestuarii</i> PCC 8106 | Nitrogen Meta   | -none- | -none- | Nitrate/nitrite        | 0,018747613 | 0,431286332 | 23,53716365 | 5,14080327  | 53,63893871 | 43,09941069 | 0,803509759 |
| <i>L. aestuarii</i> PCC 8106 | Photosynthes    | -none- | -none- | Photosystem            | 0,018747786 | 0,431286332 | 24,02547771 | 8,436487887 | 481,6384362 | 271,8627124 | 0,564453939 |
| <i>L. aestuarii</i> PCC 8106 | Carbohydrate    | -none- | -none- | High-affnity ca        | 0,018760814 | 0,431286332 | 27,36383442 | 0,631062442 | 47,89811926 | 57,86004892 | 1,207981645 |
| <i>L. aestuarii</i> PCC 8106 | Carbohydrate    | -none- | -none- | Possible RuB           | 0,018894891 | 0,431489853 | 23,73006135 | 9,108697259 | 695,766086  | 405,6792782 | 0,583068486 |
| <i>L. aestuarii</i> PCC 8106 | Cofactors, Vit  | -none- | -none- | Ferrochelatas          | 0,018969148 | 0,431489853 | 23,9245283  | 7,846046014 | 1021,405425 | 523,3709044 | 0,512402707 |
| <i>L. aestuarii</i> PCC 8106 | -none-          | -none- | -none- | FIG00873943            | 0,018982154 | 0,431489853 | 24,23529412 | 4,664412097 | 6,060373246 | 6,75621447  | 1,114818213 |
| <i>L. aestuarii</i> PCC 8106 | -none-          | -none- | -none- | hypothetical p         | 0,019155649 | 0,431776043 | 22,62292436 | 13,81368704 | 211,7257574 | 192,0882721 | 0,907250372 |
| <i>L. aestuarii</i> PCC 8106 | -none-          | -none- | -none- | hypothetical p         | 0,019191544 | 0,431776043 | 23,21867955 | 14,32095738 | 10,22244165 | 13,36982394 | 1,307889484 |
| <i>L. aestuarii</i> PCC 8106 | Stress Respo    | -none- | -none- | diguanylate c          | 0,019218556 | 0,431776043 | 21,90255028 | 13,65229112 | 0,870402591 | 1,027864934 | 1,027864934 |
| <i>L. aestuarii</i> PCC 8106 | -none-          | -none- | -none- | pentapeptide           | 0,019315886 | 0,431776043 | 23,05922574 | 6,150367558 | 23,43930417 | 18,88364173 | 0,80564003  |
| <i>L. aestuarii</i> PCC 8106 | Amino Acids a   | -none- | -none- | Leucine dehy           | 0,019414245 | 0,431776043 | 21,4213198  | 10,92013861 | 112,9317877 | 120,6417596 | 1,068271052 |
| <i>L. aestuarii</i> PCC 8106 | -none-          | -none- | -none- | Transposase            | 0,01950791  | 0,431776043 | 20,37389771 | 11,66262163 | 83,47771426 | 54,65290964 | 0,6547006   |
| <i>L. aestuarii</i> PCC 8106 | Motility and C  | -none- | -none- | Flagellar hook         | 0,019525714 | 0,431776043 | 23,42238505 | 7,379072672 | 50,54843531 | 21,9328407  | 0,43389752  |
| <i>L. aestuarii</i> PCC 8106 | -none-          | -none- | -none- | Lead, cadmiu           | 0,019561751 | 0,431776043 | 23,2021353  | 10,95075607 | 9,945681592 | 5,966007911 | 0,59985913  |
| <i>L. aestuarii</i> PCC 8106 | -none-          | -none- | -none- | ABC-type dip           | 0,019759352 | 0,434563083 | 23,9245283  | 7,784516851 | 67,18941877 | 43,14433083 | 0,642129842 |
| <i>L. aestuarii</i> PCC 8106 | -none-          | -none- | -none- | hypothetical p         | 0,020152144 | 0,441124596 | 21,33333333 | 11,53562899 | 49,40084119 | 24,15025073 | 0,488863148 |
| <i>L. aestuarii</i> PCC 8106 | -none-          | -none- | -none- | Periplasmic c          | 0,020336944 | 0,441124596 | 24,12903226 | 4,841463865 | 78,49431563 | 59,65958002 | 0,760049687 |



|                              |                |        |        |                |             |             |             |             |             |             |             |
|------------------------------|----------------|--------|--------|----------------|-------------|-------------|-------------|-------------|-------------|-------------|-------------|
| <i>L. aestuarii</i> PCC 8106 | -none-         | -none- | -none- | hypothetical p | 0,020349925 | 0,441124596 | 20,0201005  | 12,93274938 | 390,2072053 | 385,8091657 | 0,988728964 |
| <i>L. aestuarii</i> PCC 8106 | Respiration    | -none- | -none- | D(P)H-quinon   | 0,020396473 | 0,441124596 | 23,9245283  | 8,406890702 | 16,39730152 | 10,85886637 | 0,662234963 |
| <i>L. aestuarii</i> PCC 8106 | Fatty Acids, L | -none- | -none- | Carotenoid cis | 0,020419753 | 0,441124596 | 24,02547771 | 7,758402316 | 38,32246029 | 27,68493414 | 0,722420584 |
| <i>L. aestuarii</i> PCC 8106 | -none-         | -none- | -none- | Pentapeptide   | 0,02053384  | 0,441433654 | 26,26950355 | 0,723922296 | 40,58610281 | 36,96730728 | 0,910836585 |
| <i>L. aestuarii</i> PCC 8106 | -none-         | -none- | -none- | hypothetical p | 0,020857764 | 0,441433654 | 22,71437782 | 13,35098958 | 413,0659598 | 442,5073806 | 1,07127535  |
| <i>L. aestuarii</i> PCC 8106 | -none-         | -none- | -none- | Protein often  | 0,020917303 | 0,441433654 | 23,8055197  | 2,030293744 | 6,235385325 | 6,97469758  | 1,118567212 |
| <i>L. aestuarii</i> PCC 8106 | -none-         | -none- | -none- | hypothetical p | 0,020943631 | 0,441433654 | 21,30139721 | 12,86951721 | 20,36200009 | 17,58921771 | 0,863825638 |
| <i>L. aestuarii</i> PCC 8106 | -none-         | -none- | -none- | Phospho-N-ac   | 0,020965507 | 0,441433654 | 24,12903226 | 6,895507693 | 102,3505769 | 39,85270153 | 0,389374469 |
| <i>L. aestuarii</i> PCC 8106 | -none-         | -none- | -none- | hypothetical p | 0,020993176 | 0,441433654 | 20,93714286 | 13,41050795 | 28,17281775 | 26,71081149 | 0,948105785 |
| <i>L. aestuarii</i> PCC 8106 | -none-         | -none- | -none- | hypothetical p | 0,021113389 | 0,441433654 | 21,85383244 | 14,24519129 | 4404,035205 | 3449,746583 | 0,783314943 |
| <i>L. aestuarii</i> PCC 8106 | -none-         | -none- | -none- | hypothetical p | 0,021132744 | 0,441433654 | 22,88368539 | 5,332099163 | 67,71928848 | 52,0558559  | 0,768700574 |
| <i>L. aestuarii</i> PCC 8106 | -none-         | -none- | -none- | Cell envelope  | 0,021161119 | 0,441433654 | 24,23529412 | 7,152332155 | 18,12181725 | 7,709112881 | 0,425405067 |
| <i>L. aestuarii</i> PCC 8106 | -none-         | -none- | -none- | Membrane pr    | 0,021217874 | 0,441433654 | 22,21157685 | 10,82096636 | 245,1436463 | 52,8310887  | 0,21551074  |
| <i>L. aestuarii</i> PCC 8106 | -none-         | -none- | -none- | hypothetical p | 0,021338551 | 0,441433654 | 22,69903204 | 13,88395559 | 63,55436589 | 81,30138228 | 1,279241499 |
| <i>L. aestuarii</i> PCC 8106 | Carbohydrate   | -none- | -none- | 2,3-bisphosph  | 0,021591217 | 0,441433654 | 20,37389771 | 12,75560878 | 73,52600396 | 57,75955324 | 0,785566332 |
| <i>L. aestuarii</i> PCC 8106 | -none-         | -none- | -none- | hypothetical p | 0,021715708 | 0,441433654 | 23,50198413 | 3,703788621 | 2,585317119 | 3,589884273 | 1,388566318 |
| <i>L. aestuarii</i> PCC 8106 | Respiration    | -none- | -none- | ATP synthase   | 0,021779181 | 0,441433654 | 24,02547771 | 7,659740318 | 138,9629314 | 112,5776998 | 0,810127555 |
| <i>L. aestuarii</i> PCC 8106 | Amino Acids a  | -none- | -none- | Chorismate s   | 0,021792178 | 0,441433654 | 23,2021353  | 6,112137462 | 289,7045668 | 157,4252636 | 0,543399317 |
| <i>L. aestuarii</i> PCC 8106 | -none-         | -none- | -none- | hypothetical p | 0,021812453 | 0,441433654 | 23,60776337 | 7,782423277 | 113,0757859 | 73,70202067 | 0,651793132 |
| <i>L. aestuarii</i> PCC 8106 | -none-         | -none- | -none- | hypothetical p | 0,021881963 | 0,441433654 | 23,80331263 | 3,438838872 | 6,119918819 | 5,664574575 | 0,925596359 |
| <i>L. aestuarii</i> PCC 8106 | -none-         | -none- | -none- | Transposase    | 0,021892037 | 0,441433654 | 23,73006135 | 16,60486323 | 388,1083662 | 261,4328252 | 0,673607807 |
| <i>L. aestuarii</i> PCC 8106 | -none-         | -none- | -none- | Transmembra    | 0,02191212  | 0,441433654 | 23,38493523 | 5,385236875 | 7,77188951  | 7,290801563 | 0,938098972 |
| <i>L. aestuarii</i> PCC 8106 | Respiration    | -none- | -none- | Flavodoxin re  | 0,022046277 | 0,441433654 | 20,79722717 | 11,70350447 | 2,251255229 | 2,871537376 | 1,275527243 |
| <i>L. aestuarii</i> PCC 8106 | -none-         | -none- | -none- | hypothetical p | 0,022165445 | 0,441433654 | 23,05922574 | 5,109708886 | 135,8822461 | 76,91214662 | 0,566020571 |
| <i>L. aestuarii</i> PCC 8106 | -none-         | -none- | -none- | peptidase S1   | 0,022171254 | 0,441433654 | 27,36383442 | 0,755133207 | 300,4511121 | 319,2620631 | 1,062609024 |
| <i>L. aestuarii</i> PCC 8106 | Carbohydrate   | -none- | -none- | Beta-phospho   | 0,022240347 | 0,441433654 | 24,02547771 | 7,089516508 | 20,05232185 | 20,87220154 | 1,040887021 |
| <i>L. aestuarii</i> PCC 8106 | -none-         | -none- | -none- | hypothetical p | 0,022334597 | 0,441433654 | 23,53826976 | 21,23437377 | 1,41115035  | 1,887194556 | 1,337344781 |
| <i>L. aestuarii</i> PCC 8106 | -none-         | -none- | -none- | Uncharacteriz  | 0,022404619 | 0,441433654 | 23,65069627 | 7,79888935  | 65,00403881 | 50,96958711 | 0,784098774 |
| <i>L. aestuarii</i> PCC 8106 | Respiration    | -none- | -none- | Cytochrome b   | 0,022440036 | 0,441433654 | 23,63636364 | 10,09244911 | 320,2331359 | 139,9346101 | 0,436977297 |
| <i>L. aestuarii</i> PCC 8106 | -none-         | -none- | -none- | Lycopene cyc   | 0,022517759 | 0,441433654 | 23,02440976 | 6,841178686 | 13,01783624 | 6,239705491 | 0,47931971  |
| <i>L. aestuarii</i> PCC 8106 | -none-         | -none- | -none- | Retil pigment  | 0,02259912  | 0,441433654 | 20,26388889 | 11,08236686 | 127,7544263 | 104,8657077 | 0,820838156 |
| <i>L. aestuarii</i> PCC 8106 | -none-         | -none- | -none- | FIG00875501    | 0,022623053 | 0,441433654 | 23,16584967 | 5,662330388 | 57,81855032 | 42,28355797 | 0,731314738 |
| <i>L. aestuarii</i> PCC 8106 | -none-         | -none- | -none- | Two-compon     | 0,022708044 | 0,441433654 | 23,46717818 | 4,2532009   | 11,16900437 | 10,97590739 | 0,982711353 |
| <i>L. aestuarii</i> PCC 8106 | Nitrogen Meta  | -none- | -none- | 2-hydroxy-3-o  | 0,022712359 | 0,441433654 | 23,82608696 | 8,318644386 | 20,28473527 | 12,08971869 | 0,596000812 |
| <i>L. aestuarii</i> PCC 8106 | Stress Respo   | -none- | -none- | universal stre | 0,022752818 | 0,441433654 | 24,23529412 | 3,793442406 | 48,32986008 | 55,78255166 | 1,1542047   |
| <i>L. aestuarii</i> PCC 8106 | Membrane Tr    | -none- | -none- | Twitching mo   | 0,023009039 | 0,442586284 | 27,21012321 | 10,87772697 | 17,0554242  | 16,13678336 | 0,946137908 |
| <i>L. aestuarii</i> PCC 8106 | -none-         | -none- | -none- | hypothetical p | 0,023013436 | 0,442586284 | 23,2021353  | 5,524411829 | 91,18175977 | 72,32503692 | 0,793196327 |
| <i>L. aestuarii</i> PCC 8106 | -none-         | -none- | -none- | FIG00557539    | 0,023140531 | 0,442586284 | 24,45637584 | 8,637061371 | 26,07208085 | 22,38773423 | 0,858686131 |
| <i>L. aestuarii</i> PCC 8106 | -none-         | -none- | -none- | FIG00561770    | 0,023172734 | 0,442586284 | 22,92206129 | 7,721620082 | 129,0325498 | 53,11701811 | 0,41165596  |

|                              |               |        |        |                 |             |             |             |             |             |             |             |
|------------------------------|---------------|--------|--------|-----------------|-------------|-------------|-------------|-------------|-------------|-------------|-------------|
| <i>L. aestuarii</i> PCC 8106 | Amino Acids   | -none- | -none- | Pyrraline-5-ca  | 0,023235654 | 0,442586284 | 23,13348651 | 3,716186272 | 4,341238625 | 5,377785726 | 1,238767594 |
| <i>L. aestuarii</i> PCC 8106 | -none-        | -none- | -none- | hypothetical p  | 0,02324813  | 0,442586284 | 23,77826285 | 5,06101779  | 27,26042571 | 30,35526701 | 1,113528722 |
| <i>L. aestuarii</i> PCC 8106 | D Metabolism  | -none- | -none- | Holliday junct  | 0,023336062 | 0,442876288 | 21,92667534 | 12,72503142 | 179,1931319 | 112,1843055 | 0,626052485 |
| <i>L. aestuarii</i> PCC 8106 | -none-        | -none- | -none- | High light indu | 0,023416727 | 0,443027018 | 20,22797927 | 12,16035028 | 467,3327089 | 454,7801517 | 0,973139998 |
| <i>L. aestuarii</i> PCC 8106 | Amino Acids   | -none- | -none- | Cyanophycise    | 0,023601754 | 0,443915507 | 22,1575367  | 10,99437873 | 6,734040394 | 8,006763724 | 1,18899847  |
| <i>L. aestuarii</i> PCC 8106 | -none-        | -none- | -none- | membrane pr     | 0,023675076 | 0,443915507 | 23,9245283  | 5,565467504 | 10,42933988 | 11,54308646 | 1,106789748 |
| <i>L. aestuarii</i> PCC 8106 | Nitrogen Meta | -none- | -none- | Ammonium tr     | 0,023851031 | 0,443915507 | 23,05922574 | 5,705224037 | 9,201646739 | 6,867086293 | 0,746288842 |
| <i>L. aestuarii</i> PCC 8106 | -none-        | -none- | -none- | ATP-binding p   | 0,023911911 | 0,443915507 | 23,13348651 | 5,183924356 | 28,68337871 | 19,82242296 | 0,691076988 |
| <i>L. aestuarii</i> PCC 8106 | -none-        | -none- | -none- | FIG01191482     | 0,02398553  | 0,443915507 | 22,35690236 | 9,345214071 | 83,73921801 | 33,89617366 | 0,404782544 |
| <i>L. aestuarii</i> PCC 8106 | -none-        | -none- | -none- | hypothetical p  | 0,023987132 | 0,443915507 | 27,2516129  | 25,77879637 | 18,52534219 | 26,46866518 | 1,428781445 |
| <i>L. aestuarii</i> PCC 8106 | -none-        | -none- | -none- | hypothetical p  | 0,024030826 | 0,443915507 | 27,30735931 | 27,27490886 | 1106,682692 | 1460,196667 | 1,319435713 |
| <i>L. aestuarii</i> PCC 8106 | -none-        | -none- | -none- | GCN5-related    | 0,024046638 | 0,443915507 | 21,66920915 | 2,253979326 | 9,757280522 | 10,15942514 | 1,041214826 |
| <i>L. aestuarii</i> PCC 8106 | -none-        | -none- | -none- | Geranylgeran    | 0,024141845 | 0,44432664  | 22,81459335 | 6,859480782 | 158,7738959 | 69,93578806 | 0,440474095 |
| <i>L. aestuarii</i> PCC 8106 | Carbohydrate  | -none- | -none- | Various polyo   | 0,024307335 | 0,44529833  | 23,46023539 | 5,153288226 | 27,46603429 | 25,23002003 | 0,91858984  |
| <i>L. aestuarii</i> PCC 8106 | -none-        | -none- | -none- | Tyrosyl-tR syr  | 0,024340831 | 0,44529833  | 22,84957098 | 5,391967843 | 87,84794906 | 67,77999667 | 0,771560377 |
| <i>L. aestuarii</i> PCC 8106 | -none-        | -none- | -none- | serine/threoni  | 0,024445218 | 0,445869069 | 23,25819574 | 3,760480102 | 14,04365969 | 9,599485102 | 0,683545836 |
| <i>L. aestuarii</i> PCC 8106 | Carbohydrate  | -none- | -none- | High-affnity ca | 0,024861928 | 0,452116023 | 23,42808691 | 8,830971876 | 30,57768382 | 14,59111338 | 0,477181773 |
| <i>L. aestuarii</i> PCC 8106 | Cell Wall and | -none- | -none- | Mannose-1-pl    | 0,025036801 | 0,453941048 | 23,16830248 | 5,374310796 | 29,02496775 | 18,99289876 | 0,654364164 |
| <i>L. aestuarii</i> PCC 8106 | Carbohydrate  | -none- | -none- | Possible carb   | 0,025165045 | 0,454912326 | 22,64506702 | 9,004605699 | 226,327821  | 143,0540402 | 0,632065645 |
| <i>L. aestuarii</i> PCC 8106 | -none-        | -none- | -none- | hypothetical p  | 0,025389318 | 0,455335489 | 21,57076781 | 10,3230364  | 3,77119603  | 4,485383995 | 1,189379698 |
| <i>L. aestuarii</i> PCC 8106 | Carbohydrate  | -none- | -none- | Glycerophosp    | 0,025464944 | 0,455335489 | 23,82608696 | 7,761654829 | 11,9444384  | 6,399732973 | 0,535791869 |
| <i>L. aestuarii</i> PCC 8106 | -none-        | -none- | -none- | FIG00875839     | 0,0254758   | 0,455335489 | 23,73006135 | 8,641373543 | 290,4872612 | 219,4717177 | 0,755529577 |
| <i>L. aestuarii</i> PCC 8106 | -none-        | -none- | -none- | hypothetical p  | 0,025494223 | 0,455335489 | 23,16830248 | 5,225011352 | 542,7741742 | 295,8231528 | 0,545020686 |
| <i>L. aestuarii</i> PCC 8106 | -none-        | -none- | -none- | hypothetical p  | 0,025797659 | 0,455335489 | 27,36383442 | 0,559276385 | 1037,54304  | 1418,65511  | 1,367321696 |
| <i>L. aestuarii</i> PCC 8106 | Carbohydrate  | -none- | -none- | Glycogen deb    | 0,025871621 | 0,455335489 | 23,16830248 | 4,393014798 | 41,73411773 | 39,5500961  | 0,947668197 |
| <i>L. aestuarii</i> PCC 8106 | Carbohydrate  | -none- | -none- | Triosephosph    | 0,025960284 | 0,455335489 | 23,73006135 | 8,885857457 | 107,5899056 | 72,27389992 | 0,67175354  |
| <i>L. aestuarii</i> PCC 8106 | -none-        | -none- | -none- | putative trans  | 0,026022115 | 0,455335489 | 24,12903226 | 5,029949157 | 8,907553079 | 11,70655379 | 1,314227789 |
| <i>L. aestuarii</i> PCC 8106 | -none-        | -none- | -none- | Proline dehyd   | 0,02603757  | 0,455335489 | 24,02547771 | 7,721290065 | 14,17950941 | 7,502240013 | 0,529090238 |
| <i>L. aestuarii</i> PCC 8106 | Nitrogen Meta | -none- | -none- | Allantoise (EC  | 0,026089791 | 0,455335489 | 23,76766936 | 3,471142251 | 3,915070936 | 5,708476089 | 1,458077308 |
| <i>L. aestuarii</i> PCC 8106 | -none-        | -none- | -none- | transposase     | 0,02612464  | 0,455335489 | 23,9245283  | 7,772593091 | 80,24120442 | 27,62686543 | 0,344297741 |
| <i>L. aestuarii</i> PCC 8106 | -none-        | -none- | -none- | hypothetical p  | 0,026126294 | 0,455335489 | 24,02547771 | 7,367712995 | 35,06821852 | 15,666452   | 0,446742169 |
| <i>L. aestuarii</i> PCC 8106 | -none-        | -none- | -none- | N-acetylmura    | 0,026160115 | 0,455335489 | 24,02547771 | 7,484746777 | 38,89455997 | 20,53677091 | 0,528011396 |
| <i>L. aestuarii</i> PCC 8106 | -none-        | -none- | -none- | hypothetical p  | 0,026335375 | 0,457080074 | 22,92206129 | 5,398215102 | 34,951718   | 30,37033141 | 0,868922421 |
| <i>L. aestuarii</i> PCC 8106 | -none-        | -none- | -none- | hypothetical p  | 0,026438112 | 0,457559593 | 22,40898543 | 15,23093465 | 789,4675545 | 615,9665805 | 0,780230393 |
| <i>L. aestuarii</i> PCC 8106 | Protein Metab | -none- | -none- | TldE/PmbA fa    | 0,026783173 | 0,460568395 | 23,05922574 | 6,133216608 | 30,89378238 | 19,25935898 | 0,623405666 |
| <i>L. aestuarii</i> PCC 8106 | Carbohydrate  | -none- | -none- | 1,4-alpha-glu   | 0,026828089 | 0,460568395 | 23,73006135 | 7,791962647 | 143,6860308 | 111,0127809 | 0,772606636 |
| <i>L. aestuarii</i> PCC 8106 | -none-        | -none- | -none- | hypothetical p  | 0,026903511 | 0,460568395 | 23,60468769 | 9,747964795 | 36,59298739 | 18,98331829 | 0,518769296 |
| <i>L. aestuarii</i> PCC 8106 | -none-        | -none- | -none- | ATP-grasp lig   | 0,026977025 | 0,460568395 | 21,6825973  | 12,39129309 | 25,72612056 | 22,65433555 | 0,880596649 |
| <i>L. aestuarii</i> PCC 8106 | -none-        | -none- | -none- | Non-specific l  | 0,026989973 | 0,460568395 | 23,20347739 | 8,457207005 | 809,353826  | 234,7309044 | 0,290022604 |

|                              |               |        |        |                |             |             |             |             |             |             |             |
|------------------------------|---------------|--------|--------|----------------|-------------|-------------|-------------|-------------|-------------|-------------|-------------|
| <i>L. aestuarii</i> PCC 8106 | -none-        | -none- | -none- | Glycosyl trans | 0,027270209 | 0,464050588 | 23,09440065 | 5,686989441 | 35,75625747 | 26,34858361 | 0,736894336 |
| <i>L. aestuarii</i> PCC 8106 | Stress Respo  | -none- | -none- | Universal stre | 0,027419893 | 0,464663165 | 23,27585849 | 6,532110508 | 74,57954572 | 38,84449316 | 0,520846471 |
| <i>L. aestuarii</i> PCC 8106 | D Metabolism  | -none- | -none- | Single-strand  | 0,027517994 | 0,464663165 | 24,02547771 | 7,757964046 | 203,5147423 | 107,5443643 | 0,528435253 |
| <i>L. aestuarii</i> PCC 8106 | -none-        | -none- | -none- | Aspartyl-tR(A  | 0,027596602 | 0,464663165 | 23,82608696 | 7,687848805 | 32,46638429 | 21,44889693 | 0,660649388 |
| <i>L. aestuarii</i> PCC 8106 | Metabolism of | -none- | -none- | Lignostilbene  | 0,027621786 | 0,464663165 | 21,33333333 | 11,60976536 | 218,9400584 | 142,2451679 | 0,649699141 |
| <i>L. aestuarii</i> PCC 8106 | Protein Metab | -none- | -none- | SSU ribosom    | 0,027687579 | 0,464663165 | 24,12903226 | 8,939394823 | 142,9516818 | 77,63738034 | 0,543102252 |
| <i>L. aestuarii</i> PCC 8106 | -none-        | -none- | -none- | phosphatidylc  | 0,027852608 | 0,465799878 | 23,63636364 | 8,943547003 | 145,601331  | 95,65643108 | 0,656974977 |
| <i>L. aestuarii</i> PCC 8106 | -none-        | -none- | -none- | ComEC/Rec2     | 0,027956404 | 0,465799878 | 23,1778365  | 8,092916677 | 15,74952066 | 8,226994493 | 0,522364754 |
| <i>L. aestuarii</i> PCC 8106 | -none-        | -none- | -none- | Type II secret | 0,028034658 | 0,465799878 | 23,12994006 | 5,790794214 | 317,7400455 | 172,593578  | 0,543191142 |
| <i>L. aestuarii</i> PCC 8106 | -none-        | -none- | -none- | hypothetical p | 0,028071142 | 0,465799878 | 23,00254249 | 6,541725243 | 60,76160364 | 33,36216146 | 0,549066507 |
| <i>L. aestuarii</i> PCC 8106 | -none-        | -none- | -none- | Transcriptio   | 0,02819028  | 0,465799878 | 23,20347739 | 9,264502733 | 31,72654903 | 21,12198128 | 0,665750985 |
| <i>L. aestuarii</i> PCC 8106 | -none-        | -none- | -none- | FIG00870303    | 0,028237158 | 0,465799878 | 23,73696345 | 4,976581118 | 65,17209264 | 61,09997089 | 0,937517401 |
| <i>L. aestuarii</i> PCC 8106 | Phosphorus M  | -none- | -none- | Alkaline phos  | 0,028387063 | 0,465799878 | 23,63636364 | 7,89149556  | 3,286207333 | 2,818893318 | 0,857795334 |
| <i>L. aestuarii</i> PCC 8106 | -none-        | -none- | -none- | hypothetical p | 0,028423521 | 0,465799878 | 23,61577341 | 5,158419027 | 141,6767303 | 86,05910267 | 0,607432868 |
| <i>L. aestuarii</i> PCC 8106 | -none-        | -none- | -none- | Putative hem   | 0,028458599 | 0,465799878 | 22,27783849 | 12,81619771 | 0,572209673 | 0,688495828 | 0,688495828 |
| <i>L. aestuarii</i> PCC 8106 | -none-        | -none- | -none- | Peptidase S1   | 0,028590664 | 0,465799878 | 24,23529412 | 8,438012585 | 1,848407872 | 1,64554899  | 0,8902521   |
| <i>L. aestuarii</i> PCC 8106 | -none-        | -none- | -none- | Lead, cadmiu   | 0,028596381 | 0,465799878 | 20,05387205 | 11,73291641 | 31,04027758 | 20,48807175 | 0,660047955 |
| <i>L. aestuarii</i> PCC 8106 | -none-        | -none- | -none- | FIG00873973    | 0,02885467  | 0,465844876 | 22,92206129 | 6,468766412 | 64,32567126 | 41,38655323 | 0,643390926 |
| <i>L. aestuarii</i> PCC 8106 | -none-        | -none- | -none- | hypothetical p | 0,028874391 | 0,465844876 | 23,34787963 | 5,043488111 | 7,757087987 | 8,256801703 | 1,064420272 |
| <i>L. aestuarii</i> PCC 8106 | -none-        | -none- | -none- | Glycosyl trans | 0,0289007   | 0,465844876 | 23,9245283  | 7,713695917 | 101,1181727 | 55,09834926 | 0,544890674 |
| <i>L. aestuarii</i> PCC 8106 | Phosphorus M  | -none- | -none- | Alkaline phos  | 0,028928526 | 0,465844876 | 24,08224777 | 9,782029141 | 24,74631809 | 8,915515801 | 0,360276457 |
| <i>L. aestuarii</i> PCC 8106 | -none-        | -none- | -none- | FIG00565091    | 0,028981485 | 0,465844876 | 23,53716365 | 5,160070673 | 32,88428344 | 27,71199562 | 0,842712467 |
| <i>L. aestuarii</i> PCC 8106 | -none-        | -none- | -none- | autotransport  | 0,029254229 | 0,468991483 | 24,34437086 | 3,371207595 | 27,27309147 | 30,06157146 | 1,102242901 |
| <i>L. aestuarii</i> PCC 8106 | -none-        | -none- | -none- | hypothetical p | 0,029536255 | 0,470196953 | 23,38693139 | 3,569569586 | 35,22307103 | 33,80498267 | 0,959739787 |
| <i>L. aestuarii</i> PCC 8106 | Phosphorus M  | -none- | -none- | Phosphate tra  | 0,029573739 | 0,470196953 | 20,05387205 | 11,92477964 | 44,04500298 | 34,93154998 | 0,793087697 |
| <i>L. aestuarii</i> PCC 8106 | -none-        | -none- | -none- | hypothetical p | 0,029607621 | 0,470196953 | 23,09902399 | 13,23514473 | 30,11390105 | 20,21434483 | 0,671262909 |
| <i>L. aestuarii</i> PCC 8106 | -none-        | -none- | -none- | hypothetical p | 0,029723733 | 0,470196953 | 23,46023539 | 6,65474911  | 61,81825274 | 44,61198801 | 0,721663684 |
| <i>L. aestuarii</i> PCC 8106 | -none-        | -none- | -none- | mannosyltran   | 0,029738207 | 0,470196953 | 22,81579943 | 8,799945408 | 3,59507528  | 2,218282309 | 0,617033618 |
| <i>L. aestuarii</i> PCC 8106 | -none-        | -none- | -none- | hypothetical p | 0,029792519 | 0,470196953 | 27,30735931 | 27,2165556  | 1124,509343 | 1608,939246 | 1,430792244 |
| <i>L. aestuarii</i> PCC 8106 | -none-        | -none- | -none- | hypothetical p | 0,029968155 | 0,471746777 | 23,9245283  | 7,679059887 | 14,00301256 | 13,31955331 | 0,951191985 |
| <i>L. aestuarii</i> PCC 8106 | Clustering-ba | -none- | -none- | Peptide defor  | 0,030286549 | 0,475530039 | 23,27492642 | 5,257177227 | 126,8561027 | 98,29273216 | 0,774836449 |
| <i>L. aestuarii</i> PCC 8106 | -none-        | -none- | -none- | hypothetical p | 0,030526994 | 0,478073123 | 22,9181479  | 5,820798679 | 123,4664507 | 68,2780515  | 0,553008944 |
| <i>L. aestuarii</i> PCC 8106 | Regulation an | -none- | -none- | Adenylate cyc  | 0,03064653  | 0,47871452  | 23,17691456 | 4,378448566 | 17,30699244 | 14,01304326 | 0,80967524  |
| <i>L. aestuarii</i> PCC 8106 | -none-        | -none- | -none- | hypothetical p | 0,030913996 | 0,481121694 | 22,95583284 | 5,726652531 | 130,1155875 | 99,77452688 | 0,766814559 |
| <i>L. aestuarii</i> PCC 8106 | -none-        | -none- | -none- | hypothetical p | 0,031026089 | 0,481121694 | 21,37891154 | 3,571621236 | 15,93289402 | 15,57010617 | 0,977230261 |
| <i>L. aestuarii</i> PCC 8106 | -none-        | -none- | -none- | Possible high  | 0,031104655 | 0,481121694 | 21,33333333 | 11,95803382 | 22311,01485 | 12966,465   | 0,581168768 |
| <i>L. aestuarii</i> PCC 8106 | Amino Acids & | -none- | -none- | Glycine dehy   | 0,031116538 | 0,481121694 | 23,36842105 | 9,501811271 | 60,56885308 | 31,50833154 | 0,520206838 |
| <i>L. aestuarii</i> PCC 8106 | Amino Acids & | -none- | -none- | Diaminopimel   | 0,031470262 | 0,485359076 | 23,6872931  | 3,629532475 | 96,90777093 | 91,7201262  | 0,946468228 |
| <i>L. aestuarii</i> PCC 8106 | -none-        | -none- | -none- | hypothetical p | 0,031629516 | 0,485371272 | 24,62788505 | 22,20952169 | 0,261280838 | 0,369402976 | 0,369402976 |

|                              |                |        |        |                |             |             |             |             |             |             |             |
|------------------------------|----------------|--------|--------|----------------|-------------|-------------|-------------|-------------|-------------|-------------|-------------|
| <i>L. aestuarii</i> PCC 8106 | -none-         | -none- | -none- | Mobile eleme   | 0,0316304   | 0,485371272 | 21,1396648  | 10,98268618 | 8,100493757 | 10,40155473 | 1,284064285 |
| <i>L. aestuarii</i> PCC 8106 | -none-         | -none- | -none- | Inner membra   | 0,031820516 | 0,487061765 | 23,3133083  | 5,940567494 | 316,7317411 | 168,6954702 | 0,532613087 |
| <i>L. aestuarii</i> PCC 8106 | Carbohydrate   | -none- | -none- | Ribulose bisp  | 0,03197319  | 0,48723549  | 23,63636364 | 8,047961314 | 562,0931509 | 305,1183054 | 0,542825161 |
| <i>L. aestuarii</i> PCC 8106 | -none-         | -none- | -none- | Glyoxalase/bl  | 0,031991825 | 0,48723549  | 22,95296388 | 5,364408986 | 92,66798905 | 68,95265228 | 0,744082752 |
| <i>L. aestuarii</i> PCC 8106 | -none-         | -none- | -none- | Cyanobacteri   | 0,032118629 | 0,487946851 | 20,30017452 | 11,67988365 | 537,3692892 | 452,619896  | 0,842288358 |
| <i>L. aestuarii</i> PCC 8106 | Potassium me   | -none- | -none- | Potassium-tra  | 0,032436278 | 0,489932723 | 23,38493523 | 6,209349705 | 76,11849093 | 37,13155991 | 0,487812612 |
| <i>L. aestuarii</i> PCC 8106 | Phosphorus M   | -none- | -none- | Alkaline phos  | 0,03248835  | 0,489932723 | 23,57625492 | 5,189953725 | 34,28826832 | 16,95003308 | 0,49433914  |
| <i>L. aestuarii</i> PCC 8106 | Phosphorus M   | -none- | -none- | Alkaline phos  | 0,032582644 | 0,489932723 | 23,73006135 | 7,921001762 | 15,18097162 | 10,73847065 | 0,707363858 |
| <i>L. aestuarii</i> PCC 8106 | -none-         | -none- | -none- | hypothetical p | 0,032589482 | 0,489932723 | 20,1980162  | 11,10434628 | 132,1653732 | 70,88652925 | 0,53634721  |
| <i>L. aestuarii</i> PCC 8106 | -none-         | -none- | -none- | FIG00873388    | 0,032683443 | 0,489932723 | 23,55751233 | 7,884125431 | 179,7356252 | 81,85226485 | 0,455403678 |
| <i>L. aestuarii</i> PCC 8106 | Carbohydrate   | -none- | -none- | Phosphoglycc   | 0,032786953 | 0,489932723 | 21,52175052 | 13,86135857 | 1,543796648 | 1,832036599 | 1,186708496 |
| <i>L. aestuarii</i> PCC 8106 | -none-         | -none- | -none- | FIG00566775    | 0,032817063 | 0,489932723 | 23,63636364 | 7,843822616 | 129,8799042 | 86,80581473 | 0,668354471 |
| <i>L. aestuarii</i> PCC 8106 | -none-         | -none- | -none- | Secreted and   | 0,032892726 | 0,489932723 | 23,63636364 | 8,973924445 | 847,1282207 | 663,599486  | 0,783351882 |
| <i>L. aestuarii</i> PCC 8106 | -none-         | -none- | -none- | Methyltransfe  | 0,033089525 | 0,491661914 | 27,1965812  | 0,600171463 | 88,49571395 | 132,2928281 | 1,494906614 |
| <i>L. aestuarii</i> PCC 8106 | -none-         | -none- | -none- | 2-keto-3-deox  | 0,033216755 | 0,491864897 | 27,00599749 | 1,009510326 | 111,110924  | 104,1054282 | 0,936950432 |
| <i>L. aestuarii</i> PCC 8106 | -none-         | -none- | -none- | hypothetical p | 0,033372013 | 0,491864897 | 20,64468864 | 12,01191518 | 18,85375023 | 24,51461054 | 1,300251157 |
| <i>L. aestuarii</i> PCC 8106 | -none-         | -none- | -none- | hypothetical p | 0,033384972 | 0,491864897 | 23,2021353  | 3,635637777 | 101,5260701 | 64,35618319 | 0,633888253 |
| <i>L. aestuarii</i> PCC 8106 | -none-         | -none- | -none- | Sigl Transduc  | 0,033426144 | 0,491864897 | 21,59722222 | 12,47096088 | 523,5465382 | 474,5661602 | 0,906445035 |
| <i>L. aestuarii</i> PCC 8106 | -none-         | -none- | -none- | Probable RND   | 0,03364946  | 0,492896138 | 23,54491018 | 9,39494358  | 85,24220158 | 63,16114341 | 0,740960959 |
| <i>L. aestuarii</i> PCC 8106 | -none-         | -none- | -none- | hypothetical p | 0,033658042 | 0,492896138 | 20,15726496 | 11,73147098 | 728,2473524 | 383,3667453 | 0,526423809 |
| <i>L. aestuarii</i> PCC 8106 | -none-         | -none- | -none- | Carboxynorsp   | 0,034066067 | 0,497675017 | 20,37389771 | 12,60166633 | 11,27270178 | 12,11980351 | 1,075146291 |
| <i>L. aestuarii</i> PCC 8106 | Protein Metab  | -none- | -none- | Translation el | 0,03421233  | 0,498616069 | 23,05958781 | 10,64082186 | 970,3389145 | 385,8634211 | 0,397658401 |
| <i>L. aestuarii</i> PCC 8106 | -none-         | -none- | -none- | Permeases o    | 0,034579748 | 0,50276808  | 22,05925926 | 12,07712857 | 48,05996356 | 41,59179498 | 0,865414618 |
| <i>L. aestuarii</i> PCC 8106 | -none-         | -none- | -none- | RND multidru   | 0,034677133 | 0,50298356  | 23,82608696 | 7,865606587 | 8,071914203 | 9,792421454 | 1,213147366 |
| <i>L. aestuarii</i> PCC 8106 | -none-         | -none- | -none- | Changed star   | 0,034853076 | 0,504334768 | 20,33684211 | 11,80425306 | 72,54644713 | 64,00671673 | 0,882286029 |
| <i>L. aestuarii</i> PCC 8106 | Cofactors, Vit | -none- | -none- | Pterin-4-alpha | 0,035134165 | 0,507197468 | 23,54664943 | 4,921559105 | 16,93902905 | 16,9335448  | 0,999676236 |
| <i>L. aestuarii</i> PCC 8106 | -none-         | -none- | -none- | hypothetical p | 0,035341833 | 0,508685997 | 20,33684211 | 12,42390145 | 3986,985387 | 2511,65492  | 0,629963413 |
| <i>L. aestuarii</i> PCC 8106 | -none-         | -none- | -none- | hypothetical p | 0,035404278 | 0,508685997 | 23,73006135 | 9,113317833 | 152,0807991 | 97,28346506 | 0,639682758 |
| <i>L. aestuarii</i> PCC 8106 | Amino Acids a  | -none- | -none- | Phosphoribos   | 0,035562258 | 0,50923029  | 23,13348651 | 3,94327401  | 19,81730113 | 18,87750157 | 0,952576814 |
| <i>L. aestuarii</i> PCC 8106 | -none-         | -none- | -none- | Thioredoxin a  | 0,035763538 | 0,50923029  | 24,12903226 | 8,630490495 | 136,1159875 | 75,14040966 | 0,552032212 |
| <i>L. aestuarii</i> PCC 8106 | Carbohydrate   | -none- | -none- | Sensory subu   | 0,035842186 | 0,50923029  | 20,26388889 | 11,48968118 | 41,08444773 | 46,09873807 | 1,122048381 |
| <i>L. aestuarii</i> PCC 8106 | -none-         | -none- | -none- | Glycine N-me   | 0,035880777 | 0,50923029  | 20,0201005  | 12,72731079 | 410,5338403 | 175,3712025 | 0,427178433 |
| <i>L. aestuarii</i> PCC 8106 | Stress Respo   | -none- | -none- | transcriptio   | 0,035913754 | 0,50923029  | 23,2021353  | 5,608269276 | 24,82157412 | 17,36908857 | 0,699757738 |
| <i>L. aestuarii</i> PCC 8106 | -none-         | -none- | -none- | hypothetical p | 0,035991244 | 0,50923029  | 22,41682852 | 9,429957353 | 965,1900962 | 329,1466472 | 0,341017431 |
| <i>L. aestuarii</i> PCC 8106 | Virulence, Dis | -none- | -none- | RND efflux sy  | 0,036027291 | 0,50923029  | 23,20347739 | 6,053183552 | 8,484194568 | 4,544513639 | 0,535644675 |
| <i>L. aestuarii</i> PCC 8106 | -none-         | -none- | -none- | FIG00557544    | 0,036326587 | 0,511907694 | 20,0201005  | 10,96568475 | 5066,818314 | 2953,667588 | 0,58294326  |
| <i>L. aestuarii</i> PCC 8106 | -none-         | -none- | -none- | Photosystem    | 0,03643182  | 0,511907694 | 23,63636364 | 9,414218471 | 80,96497525 | 66,2530305  | 0,818292481 |
| <i>L. aestuarii</i> PCC 8106 | Clustering-ba  | -none- | -none- | Serine/threon  | 0,036468802 | 0,511907694 | 23,06490958 | 5,848604314 | 25,95132162 | 16,21747255 | 0,624918946 |
| <i>L. aestuarii</i> PCC 8106 | Amino Acids a  | -none- | -none- | Biosynthetic a | 0,036629931 | 0,512987441 | 24,23529412 | 3,954775271 | 14,22896367 | 13,29959958 | 0,934685047 |

|                              |                 |        |        |                 |             |             |             |             |             |             |             |
|------------------------------|-----------------|--------|--------|-----------------|-------------|-------------|-------------|-------------|-------------|-------------|-------------|
| <i>L. aestuarii</i> PCC 8106 | Amino Acids a   | -none- | -none- | 3-dehydroquit   | 0,036929516 | 0,513208976 | 21,40463458 | 10,92762769 | 26,51602321 | 21,57820738 | 0,813779925 |
| <i>L. aestuarii</i> PCC 8106 | -none-          | -none- | -none- | Protein phosph  | 0,037004858 | 0,513208976 | 20,56521739 | 11,68285323 | 114,9944944 | 44,08888293 | 0,383399946 |
| <i>L. aestuarii</i> PCC 8106 | -none-          | -none- | -none- | hypothetical p  | 0,037056281 | 0,513208976 | 23,73696345 | 8,799993781 | 17,18693829 | 9,709989858 | 0,564963328 |
| <i>L. aestuarii</i> PCC 8106 | Potassium me    | -none- | -none- | Potassium up    | 0,037063735 | 0,513208976 | 23,73006135 | 7,880367575 | 6,782091175 | 5,461986808 | 0,805354376 |
| <i>L. aestuarii</i> PCC 8106 | -none-          | -none- | -none- | PROBABLE T      | 0,037090531 | 0,513208976 | 20,98084291 | 11,57691242 | 194,4471455 | 91,88901817 | 0,472565529 |
| <i>L. aestuarii</i> PCC 8106 | Nucleosides a   | -none- | -none- | Adenylate kis   | 0,037287286 | 0,513208976 | 23,02440976 | 5,299832188 | 87,61213855 | 95,7612964  | 1,093014027 |
| <i>L. aestuarii</i> PCC 8106 | -none-          | -none- | -none- | hypothetical p  | 0,037294676 | 0,513208976 | 23,46717818 | 4,02238502  | 4,161905396 | 3,2858824   | 0,789513958 |
| <i>L. aestuarii</i> PCC 8106 | -none-          | -none- | -none- | Glycosyl trans  | 0,037319694 | 0,513208976 | 23,02440976 | 5,366930335 | 43,77779706 | 45,87846348 | 1,047984745 |
| <i>L. aestuarii</i> PCC 8106 | Cell Division a | -none- | -none- | Circadian inp   | 0,037446677 | 0,513509226 | 22,9181479  | 4,839864763 | 3,022523135 | 3,06553637  | 1,014230903 |
| <i>L. aestuarii</i> PCC 8106 | Cofactors, Vit  | -none- | -none- | Thiazole bios   | 0,037516494 | 0,513509226 | 22,96194541 | 8,1030382   | 62,27294006 | 33,87410124 | 0,543961811 |
| <i>L. aestuarii</i> PCC 8106 | -none-          | -none- | -none- | hypothetical p  | 0,03769951  | 0,513509226 | 22,7904855  | 17,73059264 | 49,89852857 | 27,17973105 | 0,544700051 |
| <i>L. aestuarii</i> PCC 8106 | Stress Respo    | -none- | -none- | Zinc uptake re  | 0,037743748 | 0,513509226 | 23,6961204  | 5,255200025 | 102,2326517 | 61,46116864 | 0,601189225 |
| <i>L. aestuarii</i> PCC 8106 | Protein Metab   | -none- | -none- | ATP-depende     | 0,037922316 | 0,513509226 | 22,71224488 | 7,050176056 | 898,3373978 | 426,0512566 | 0,474266414 |
| <i>L. aestuarii</i> PCC 8106 | -none-          | -none- | -none- | hypothetical p  | 0,037927259 | 0,513509226 | 23,92153923 | 3,255303966 | 41,41445083 | 29,30114265 | 0,70751011  |
| <i>L. aestuarii</i> PCC 8106 | -none-          | -none- | -none- | TM2 domain p    | 0,037986933 | 0,513509226 | 27,59731544 | 0,514512144 | 49,74022608 | 42,38910064 | 0,85220965  |
| <i>L. aestuarii</i> PCC 8106 | -none-          | -none- | -none- | Parvulin-like p | 0,038015867 | 0,513509226 | 23,27492642 | 4,115767033 | 80,44869004 | 69,93009327 | 0,869250863 |
| <i>L. aestuarii</i> PCC 8106 | Protein Metab   | -none- | -none- | TldD family p   | 0,038237073 | 0,515354536 | 23,54491018 | 7,99355974  | 36,84171197 | 34,36601141 | 0,932801696 |
| <i>L. aestuarii</i> PCC 8106 | Amino Acids a   | -none- | -none- | Aspartate am    | 0,038423818 | 0,516728256 | 23,02440976 | 5,64397258  | 28,56289024 | 15,01193008 | 0,525574616 |
| <i>L. aestuarii</i> PCC 8106 | -none-          | -none- | -none- | hypothetical p  | 0,038627513 | 0,518323369 | 20,95313291 | 11,37524439 | 3,134351605 | 4,051533642 | 1,292622575 |
| <i>L. aestuarii</i> PCC 8106 | Carbohydrate    | -none- | -none- | Acetolactate s  | 0,038813979 | 0,519680797 | 24,12903226 | 6,678427713 | 66,46773046 | 55,28842091 | 0,831808466 |
| <i>L. aestuarii</i> PCC 8106 | -none-          | -none- | -none- | Sodium/hydro    | 0,039222884 | 0,521388643 | 23,05922574 | 6,538616358 | 15,45039782 | 10,6000999  | 0,686072942 |
| <i>L. aestuarii</i> PCC 8106 | -none-          | -none- | -none- | GTP pyropho     | 0,039253475 | 0,521388643 | 24,16293835 | 2,854652506 | 20,77161742 | 14,9504966  | 0,719756016 |
| <i>L. aestuarii</i> PCC 8106 | Photosynthes    | -none- | -none- | Photosystem     | 0,039264933 | 0,521388643 | 21,06976744 | 11,30943077 | 2098,137848 | 821,8015113 | 0,391681372 |
| <i>L. aestuarii</i> PCC 8106 | -none-          | -none- | -none- | Peptide synth   | 0,039297295 | 0,521388643 | 23,16830248 | 6,558314846 | 33,97025093 | 20,462783   | 0,602373619 |
| <i>L. aestuarii</i> PCC 8106 | -none-          | -none- | -none- | Retron-type R   | 0,039369464 | 0,521388643 | 23,20571678 | 6,572273654 | 35,97278307 | 16,96467286 | 0,471597453 |
| <i>L. aestuarii</i> PCC 8106 | Stress Respo    | -none- | -none- | Serine phosph   | 0,039771499 | 0,524587168 | 23,20347739 | 5,8259812   | 60,10170389 | 28,63137722 | 0,476382122 |
| <i>L. aestuarii</i> PCC 8106 | -none-          | -none- | -none- | hypothetical p  | 0,039943782 | 0,524587168 | 23,65572617 | 4,901812664 | 26,80888208 | 25,02860829 | 0,933593882 |
| <i>L. aestuarii</i> PCC 8106 | -none-          | -none- | -none- | FIG003033: H    | 0,039999768 | 0,524587168 | 23,53826976 | 3,814097545 | 1,245598556 | 1,858520127 | 1,492069911 |
| <i>L. aestuarii</i> PCC 8106 | Cell Division a | -none- | -none- | Cell division p | 0,040013211 | 0,524587168 | 23,35115865 | 5,798566905 | 100,2173935 | 40,13227762 | 0,400452219 |
| <i>L. aestuarii</i> PCC 8106 | D Metabolism    | -none- | -none- | D repair prote  | 0,040359212 | 0,524587168 | 23,4556213  | 9,3780354   | 8,845341909 | 5,985552525 | 0,676689786 |
| <i>L. aestuarii</i> PCC 8106 | -none-          | -none- | -none- | serine/threoni  | 0,040399909 | 0,524587168 | 22,68519349 | 6,339860429 | 47,27407011 | 30,04042679 | 0,635452516 |
| <i>L. aestuarii</i> PCC 8106 | Cofactors, Vit  | -none- | -none- | Divinyl protoc  | 0,040408252 | 0,524587168 | 23,13348651 | 10,13430109 | 14,69941281 | 12,2276552  | 0,831846507 |
| <i>L. aestuarii</i> PCC 8106 | Stress Respo    | -none- | -none- | diguanylate c   | 0,040430459 | 0,524587168 | 23,05922574 | 5,374073874 | 14,11118507 | 13,6681468  | 0,968603751 |
| <i>L. aestuarii</i> PCC 8106 | Stress Respo    | -none- | -none- | diguanylate c   | 0,040442044 | 0,524587168 | 22,9181479  | 5,175999737 | 26,58665109 | 25,8181465  | 0,971094344 |
| <i>L. aestuarii</i> PCC 8106 | Iron acquisiti  | -none- | -none- | Magnesium a     | 0,04052925  | 0,524587168 | 23,2021353  | 6,724077677 | 39,44279673 | 34,90804514 | 0,885029664 |
| <i>L. aestuarii</i> PCC 8106 | -none-          | -none- | -none- | CAB/ELIP/HL     | 0,0405582   | 0,524587168 | 23,9245283  | 8,892232344 | 267,2463182 | 142,2787508 | 0,532388067 |
| <i>L. aestuarii</i> PCC 8106 | -none-          | -none- | -none- | two-compone     | 0,040917217 | 0,528109509 | 23,02440976 | 5,360781819 | 32,75805923 | 31,49659256 | 0,96149141  |
| <i>L. aestuarii</i> PCC 8106 | -none-          | -none- | -none- | hypothetical p  | 0,041211572 | 0,528668923 | 23,35102178 | 3,844644904 | 2,702213793 | 4,024419929 | 1,489304784 |
| <i>L. aestuarii</i> PCC 8106 | Virulence, Dis  | -none- | -none- | Beta-lactama    | 0,041460275 | 0,528668923 | 22,99231889 | 5,331842432 | 20,0292995  | 16,17793392 | 0,807713416 |

|                              |                |        |        |                |             |             |             |             |             |             |             |
|------------------------------|----------------|--------|--------|----------------|-------------|-------------|-------------|-------------|-------------|-------------|-------------|
| <i>L. aestuarii</i> PCC 8106 | -none-         | -none- | -none- | hypothetical p | 0,041535834 | 0,528668923 | 27,1965812  | 25,99146528 | 23,68672228 | 15,90578818 | 0,671506508 |
| <i>L. aestuarii</i> PCC 8106 | -none-         | -none- | -none- | hypothetical p | 0,041592915 | 0,528668923 | 21,3016532  | 10,11791634 | 11,24294652 | 14,50610453 | 1,290240463 |
| <i>L. aestuarii</i> PCC 8106 | Miscellaneous  | -none- | -none- | Possible alph  | 0,041640876 | 0,528668923 | 23,21102897 | 5,283668077 | 16,21201698 | 9,4701335   | 0,584142831 |
| <i>L. aestuarii</i> PCC 8106 | -none-         | -none- | -none- | hypothetical p | 0,041655986 | 0,528668923 | 23,02440976 | 5,062197663 | 23,98991273 | 26,79023225 | 1,116729041 |
| <i>L. aestuarii</i> PCC 8106 | R Metabolism   | -none- | -none- | Queuosine Bi   | 0,041744243 | 0,528668923 | 21,3016532  | 10,12742643 | 1,963508352 | 2,539608609 | 1,293403518 |
| <i>L. aestuarii</i> PCC 8106 | -none-         | -none- | -none- | hypothetical p | 0,041798866 | 0,528668923 | 24,12903226 | 6,906895    | 14,2511687  | 13,43910009 | 0,943017402 |
| <i>L. aestuarii</i> PCC 8106 | Membrane Tr    | -none- | -none- | Substrate-spe  | 0,041825128 | 0,528668923 | 23,27492642 | 5,779628989 | 60,56840612 | 28,09337112 | 0,4638288   |
| <i>L. aestuarii</i> PCC 8106 | -none-         | -none- | -none- | Undecapreny    | 0,041900197 | 0,528668923 | 24,37179487 | 2,830060209 | 13,70610705 | 14,36064621 | 1,047755293 |
| <i>L. aestuarii</i> PCC 8106 | -none-         | -none- | -none- | periplasmic se | 0,042073466 | 0,528668923 | 23,16830248 | 4,366871123 | 54,71729659 | 44,19759309 | 0,807744458 |
| <i>L. aestuarii</i> PCC 8106 | -none-         | -none- | -none- | FIG022869: C   | 0,042148682 | 0,528668923 | 23,17691456 | 5,424909133 | 3,274783171 | 2,731886745 | 0,834219123 |
| <i>L. aestuarii</i> PCC 8106 | Miscellaneous  | -none- | -none- | +/H+ antiporte | 0,042169462 | 0,528668923 | 21,33333333 | 11,71804294 | 5,638316924 | 5,543751308 | 0,983228042 |
| <i>L. aestuarii</i> PCC 8106 | Fatty Acids, L | -none- | -none- | 1-acyl-sn-glyc | 0,042217881 | 0,528668923 | 23,8055197  | 3,48037498  | 49,30206232 | 49,02143419 | 0,994307984 |
| <i>L. aestuarii</i> PCC 8106 | Cofactors, Vit | -none- | -none- | Ubiquinone bi  | 0,042386003 | 0,528668923 | 23,73006135 | 8,406828201 | 156,3463029 | 90,67970944 | 0,579992669 |
| <i>L. aestuarii</i> PCC 8106 | -none-         | -none- | -none- | Chemotactic t  | 0,042466556 | 0,528668923 | 23,09902399 | 4,14667317  | 39,88959037 | 33,23951539 | 0,83328796  |
| <i>L. aestuarii</i> PCC 8106 | R Metabolism   | -none- | -none- | Permease of    | 0,042494549 | 0,528668923 | 24,23529412 | 5,111489997 | 23,45925949 | 21,22005019 | 0,90454902  |
| <i>L. aestuarii</i> PCC 8106 | Stress Respo   | -none- | -none- | Alkyl hydrope  | 0,042522615 | 0,528668923 | 23,4556213  | 8,614021381 | 45,88827493 | 34,22597053 | 0,745854373 |
| <i>L. aestuarii</i> PCC 8106 | Phosphorus M   | -none- | -none- | Alkaline phos  | 0,042653102 | 0,528773227 | 20,22797927 | 12,89754637 | 13,38876356 | 4,354082545 | 0,32520423  |
| <i>L. aestuarii</i> PCC 8106 | -none-         | -none- | -none- | Alpha-manno    | 0,042704601 | 0,528773227 | 23,82608696 | 8,205670822 | 18,96772758 | 8,868024916 | 0,46753228  |
| <i>L. aestuarii</i> PCC 8106 | -none-         | -none- | -none- | Galactose mu   | 0,043108874 | 0,53223557  | 22,84957098 | 6,254742965 | 88,19197832 | 49,45329911 | 0,560746    |
| <i>L. aestuarii</i> PCC 8106 | Amino Acids a  | -none- | -none- | Diaminopimel   | 0,043202095 | 0,53223557  | 23,82608696 | 8,426265035 | 260,6689006 | 127,8341862 | 0,490408276 |
| <i>L. aestuarii</i> PCC 8106 | D Metabolism   | -none- | -none- | Primosomal p   | 0,043246324 | 0,53223557  | 23,06490958 | 5,606580132 | 5,447762679 | 4,72700427  | 0,867696438 |
| <i>L. aestuarii</i> PCC 8106 | Carbohydrate   | -none- | -none- | Galactose-1-p  | 0,043508196 | 0,533654437 | 23,11864407 | 14,79539254 | 15,68374146 | 10,64223989 | 0,678552367 |
| <i>L. aestuarii</i> PCC 8106 | -none-         | -none- | -none- | hypothetical p | 0,043536811 | 0,533654437 | 24,04966718 | 7,275959227 | 18,07943203 | 16,70800163 | 0,924144166 |
| <i>L. aestuarii</i> PCC 8106 | Carbohydrate   | -none- | -none- | Hydroxyacylg   | 0,043783699 | 0,534772591 | 21,45578231 | 12,0834101  | 69,10316889 | 33,40069954 | 0,483345411 |
| <i>L. aestuarii</i> PCC 8106 | -none-         | -none- | -none- | FIG038648: M   | 0,043866875 | 0,534772591 | 23,12994006 | 5,230318679 | 120,1631224 | 99,28052792 | 0,826214615 |
| <i>L. aestuarii</i> PCC 8106 | -none-         | -none- | -none- | hypothetical p | 0,043891381 | 0,534772591 | 23,12994006 | 6,390972297 | 6,294642823 | 4,690115603 | 0,745096383 |
| <i>L. aestuarii</i> PCC 8106 | -none-         | -none- | -none- | two-compone    | 0,043986981 | 0,534867641 | 24,12903226 | 7,632999585 | 771,5727627 | 270,2500468 | 0,350258666 |
| <i>L. aestuarii</i> PCC 8106 | Nucleosides a  | -none- | -none- | Nucleoside di  | 0,044175927 | 0,536095113 | 23,42238505 | 5,866601589 | 105,3994968 | 65,5810831  | 0,622214385 |
| <i>L. aestuarii</i> PCC 8106 | -none-         | -none- | -none- | hypothetical p | 0,044478463 | 0,538390996 | 23,42808691 | 7,988801784 | 26,86097795 | 27,15886171 | 1,011089833 |
| <i>L. aestuarii</i> PCC 8106 | D Metabolism   | -none- | -none- | Exonuclease    | 0,044581859 | 0,538390996 | 24,12254412 | 3,063260664 | 10,60163201 | 3,428464942 | 0,323390299 |
| <i>L. aestuarii</i> PCC 8106 | Stress Respo   | -none- | -none- | Serine phosp   | 0,044630245 | 0,538390996 | 23,73006135 | 8,019624961 | 92,99667808 | 39,26692105 | 0,42224004  |
| <i>L. aestuarii</i> PCC 8106 | -none-         | -none- | -none- | Protease       | 0,044823135 | 0,538462496 | 23,20347739 | 5,837586818 | 54,93244764 | 22,43795817 | 0,408464562 |
| <i>L. aestuarii</i> PCC 8106 | Carbohydrate   | -none- | -none- | Fructose-bisp  | 0,04484862  | 0,538462496 | 23,4556213  | 9,465222562 | 2086,918771 | 912,4726169 | 0,437234371 |
| <i>L. aestuarii</i> PCC 8106 | -none-         | -none- | -none- | Alanyl-tR syn  | 0,044901338 | 0,538462496 | 24,12903226 | 7,204721589 | 7,771908608 | 5,869322481 | 0,755197053 |
| <i>L. aestuarii</i> PCC 8106 | D Metabolism   | -none- | -none- | D repair prote | 0,045015015 | 0,538765175 | 23,9245283  | 7,512008318 | 6,23603133  | 8,624633574 | 1,383032432 |
| <i>L. aestuarii</i> PCC 8106 | Carbohydrate   | -none- | -none- | Glycogen deb   | 0,045274037 | 0,540802811 | 23,57625492 | 7,163144906 | 62,93505999 | 28,42096231 | 0,451591884 |
| <i>L. aestuarii</i> PCC 8106 | -none-         | -none- | -none- | hypothetical p | 0,045413076 | 0,540971932 | 22,46029526 | 15,4532219  | 5,870415209 | 9,063721088 | 1,543965932 |
| <i>L. aestuarii</i> PCC 8106 | -none-         | -none- | -none- | Myeloperoxid   | 0,04547152  | 0,540971932 | 24,12903226 | 5,253101316 | 66,66578288 | 53,12271427 | 0,796851278 |
| <i>L. aestuarii</i> PCC 8106 | Protein Metab  | -none- | -none- | Phospholipid-  | 0,045554596 | 0,540971932 | 24,34437086 | 4,784073757 | 14,00013219 | 12,84116214 | 0,917217207 |

|                              |                 |        |        |                 |             |             |             |             |             |             |             |
|------------------------------|-----------------|--------|--------|-----------------|-------------|-------------|-------------|-------------|-------------|-------------|-------------|
| <i>L. aestuarii</i> PCC 8106 | -none-          | -none- | -none- | SAM radical p   | 0,045940617 | 0,543873029 | 23,73006135 | 8,300728662 | 54,30862427 | 27,84590838 | 0,512734557 |
| <i>L. aestuarii</i> PCC 8106 | Protein Metab   | -none- | -none- | SSU ribosom     | 0,046541959 | 0,543873029 | 23,46023539 | 7,073994898 | 425,1794299 | 126,2392749 | 0,296908237 |
| <i>L. aestuarii</i> PCC 8106 | -none-          | -none- | -none- | TspO and ME     | 0,046654873 | 0,543873029 | 23,4807818  | 8,622696829 | 15,08756575 | 11,61928216 | 0,770123051 |
| <i>L. aestuarii</i> PCC 8106 | -none-          | -none- | -none- | FIG00871239     | 0,046723789 | 0,543873029 | 24,23529412 | 8,430395131 | 32,57678239 | 27,47993917 | 0,843543689 |
| <i>L. aestuarii</i> PCC 8106 | -none-          | -none- | -none- | SAM-depende     | 0,046909753 | 0,543873029 | 23,49694021 | 3,971616528 | 16,86031824 | 15,98933299 | 0,948341115 |
| <i>L. aestuarii</i> PCC 8106 | -none-          | -none- | -none- | FIG00567416     | 0,046923454 | 0,543873029 | 24,02547771 | 5,532079023 | 13,53851757 | 9,442115648 | 0,69742611  |
| <i>L. aestuarii</i> PCC 8106 | Clustering-ba   | -none- | -none- | Cell division p | 0,046957036 | 0,543873029 | 23,17691456 | 4,005522023 | 8,455343188 | 9,081655082 | 1,074072912 |
| <i>L. aestuarii</i> PCC 8106 | Carbohydrate    | -none- | -none- | DPH-depende     | 0,047110164 | 0,543873029 | 22,51175137 | 10,9870699  | 212,1262479 | 150,3738448 | 0,708888439 |
| <i>L. aestuarii</i> PCC 8106 | -none-          | -none- | -none- | COG0631: Se     | 0,047192869 | 0,543873029 | 23,42321703 | 3,897798696 | 42,76757796 | 43,40894923 | 1,014996671 |
| <i>L. aestuarii</i> PCC 8106 | -none-          | -none- | -none- | hypothetical p  | 0,047302291 | 0,543873029 | 24,23529412 | 4,751170861 | 86,86799772 | 81,53811668 | 0,938643906 |
| <i>L. aestuarii</i> PCC 8106 | Cell Division a | -none- | -none- | Circadian inp   | 0,047390011 | 0,543873029 | 23,53826976 | 3,771138833 | 10,47782014 | 9,8433962   | 0,939450771 |
| <i>L. aestuarii</i> PCC 8106 | -none-          | -none- | -none- | D-specific glu  | 0,047603693 | 0,543873029 | 23,14314301 | 5,489346807 | 18,36983625 | 11,26429484 | 0,613195169 |
| <i>L. aestuarii</i> PCC 8106 | Phosphorus M    | -none- | -none- | Alkaline phos   | 0,047864917 | 0,543873029 | 23,57625492 | 6,216088027 | 25,9944249  | 11,24085586 | 0,432433335 |
| <i>L. aestuarii</i> PCC 8106 | -none-          | -none- | -none- | alpha-1,6-glu   | 0,048011614 | 0,543873029 | 20,15726496 | 12,44491887 | 207,4783965 | 192,3203097 | 0,926941373 |
| <i>L. aestuarii</i> PCC 8106 | -none-          | -none- | -none- | hypothetical p  | 0,048100525 | 0,543873029 | 24,85680513 | 2,385171547 | 352,9224417 | 433,7961667 | 1,229154385 |
| <i>L. aestuarii</i> PCC 8106 | -none-          | -none- | -none- | hypothetical p  | 0,048354902 | 0,543873029 | 23,46023539 | 6,645845579 | 34,74448469 | 22,34834944 | 0,643220058 |
| <i>L. aestuarii</i> PCC 8106 | Nitrogen Metab  | -none- | -none- | Glutamine sy    | 0,048552822 | 0,543873029 | 23,61199295 | 3,759033535 | 350,3045895 | 346,9921235 | 0,990544041 |
| <i>L. aestuarii</i> PCC 8106 | Virulence, Dis  | -none- | -none- | Cobalt-zinc-ca  | 0,048822372 | 0,543873029 | 24,02547771 | 5,305652623 | 6,403933838 | 6,027880208 | 0,941277715 |
| <i>L. aestuarii</i> PCC 8106 | -none-          | -none- | -none- | hypothetical p  | 0,048927712 | 0,543873029 | 24,93851546 | 2,174888817 | 206,2127067 | 215,197989  | 1,043572884 |
| <i>L. aestuarii</i> PCC 8106 | Protein Metab   | -none- | -none- | Ribosomal su    | 0,048938221 | 0,543873029 | 23,50198413 | 3,820593415 | 702,5465223 | 676,9781684 | 0,963606177 |
| <i>L. aestuarii</i> PCC 8106 | -none-          | -none- | -none- | hypothetical p  | 0,049114579 | 0,543873029 | 22,88368539 | 5,44138694  | 154,7954759 | 146,4702201 | 0,946217706 |
| <i>L. aestuarii</i> PCC 8106 | -none-          | -none- | -none- | ABC transpor    | 0,049161567 | 0,543873029 | 27,42105263 | 27,38874952 | 14,06272312 | 11,23958396 | 0,799246623 |
| <i>L. aestuarii</i> PCC 8106 | -none-          | -none- | -none- | hypothetical p  | 0,049247762 | 0,543873029 | 23,89026783 | 5,017957551 | 144,0014063 | 76,94940084 | 0,534365621 |
| <i>L. aestuarii</i> PCC 8106 | -none-          | -none- | -none- | Putative thyla  | 0,049322448 | 0,543873029 | 23,38693139 | 5,232697339 | 126,7383865 | 73,19223965 | 0,577506481 |
| <i>L. aestuarii</i> PCC 8106 | -none-          | -none- | -none- | Acetyltransfer  | 0,049324533 | 0,543873029 | 23,2021353  | 4,922727493 | 3,967885052 | 5,091825236 | 1,28325926  |
| <i>L. aestuarii</i> PCC 8106 | Carbohydrate    | -none- | -none- | Succite dehyd   | 0,049352067 | 0,543873029 | 23,28030746 | 5,891273067 | 93,09113961 | 51,7687838  | 0,556108605 |
| <i>L. aestuarii</i> PCC 8106 | -none-          | -none- | -none- | hypothetical p  | 0,04935473  | 0,543873029 | 23,73006135 | 8,261595149 | 235,71826   | 126,3429897 | 0,535991525 |
| <i>L. aestuarii</i> PCC 8106 | -none-          | -none- | -none- | hypothetical p  | 0,049385    | 0,543873029 | 27,14225053 | 27,09914828 | 149,3424125 | 215,6838855 | 1,444223928 |
| <i>L. aestuarii</i> PCC 8106 | -none-          | -none- | -none- | Anti-sigma F    | 0,049438804 | 0,543873029 | 23,63636364 | 8,891316598 | 1139,344867 | 499,189783  | 0,438137563 |
| <i>L. aestuarii</i> PCC 8106 | -none-          | -none- | -none- | serine/threoni  | 0,049446701 | 0,543873029 | 23,9245283  | 5,701714862 | 97,81296143 | 80,47386708 | 0,82273214  |
| <i>L. aestuarii</i> PCC 8106 | -none-          | -none- | -none- | Mobile eleme    | 0,049496571 | 0,543873029 | 23,64944276 | 3,785937596 | 15,11003191 | 16,36584407 | 1,083111152 |
| <i>L. aestuarii</i> PCC 8106 | Miscellaneous   | -none- | -none- | CysteinyI-tR s  | 0,049694739 | 0,543873029 | 22,58074009 | 6,975367952 | 36,2739878  | 22,98558938 | 0,633665907 |
| <i>L. aestuarii</i> PCC 8106 | -none-          | -none- | -none- | Protein of unk  | 0,049760275 | 0,543873029 | 23,06490958 | 5,725095645 | 10,39240441 | 6,345908873 | 0,610629516 |
| <i>L. aestuarii</i> PCC 8106 | -none-          | -none- | -none- | FIG00564192     | 0,049807378 | 0,543873029 | 23,12994006 | 5,162356847 | 10,39591888 | 9,31274407  | 0,89580769  |
| <i>L. aestuarii</i> PCC 8106 | Cell Wall and   | -none- | -none- | Lipopolysacch   | 0,049863774 | 0,543873029 | 24,02547771 | 5,258960196 | 19,38987887 | 23,54961076 | 1,214531092 |
| <i>L. aestuarii</i> PCC 8106 | Clustering-ba   | -none- | -none- | Cell division t | 0,050057884 | 0,543873029 | 22,9181479  | 5,393734155 | 38,79230048 | 27,48499269 | 0,708516699 |
| <i>L. aestuarii</i> PCC 8106 | -none-          | -none- | -none- | hypothetical p  | 0,050089148 | 0,543873029 | 23,12994006 | 5,030841556 | 22,14901921 | 26,45000211 | 1,194183899 |
| <i>L. aestuarii</i> PCC 8106 | Nucleosides a   | -none- | -none- | Amidophosph     | 0,050130756 | 0,543873029 | 23,05922574 | 6,50446953  | 67,43259123 | 23,00453625 | 0,341148632 |
| <i>L. aestuarii</i> PCC 8106 | -none-          | -none- | -none- | hypothetical p  | 0,050249024 | 0,543873029 | 23,21102897 | 4,101173746 | 140,9232933 | 130,7679136 | 0,927936826 |

|                              |                |        |        |                |             |             |             |             |             |             |             |
|------------------------------|----------------|--------|--------|----------------|-------------|-------------|-------------|-------------|-------------|-------------|-------------|
| <i>L. aestuarii</i> PCC 8106 | -none-         | -none- | -none- | Cytochrome b   | 0,050257893 | 0,543873029 | 21,33333333 | 10,83881729 | 454,6037244 | 276,2727947 | 0,607722242 |
| <i>L. aestuarii</i> PCC 8106 | -none-         | -none- | -none- | hypothetical p | 0,050296284 | 0,543873029 | 24,02547771 | 5,211791602 | 30,1686936  | 29,32128963 | 0,971911148 |
| <i>L. aestuarii</i> PCC 8106 | Photosynthes   | -none- | -none- | Putative chap  | 0,050415705 | 0,543873029 | 23,75318489 | 8,518941218 | 40,44152199 | 39,60083942 | 0,97921239  |
| <i>L. aestuarii</i> PCC 8106 | -none-         | -none- | -none- | Retron-type R  | 0,050448883 | 0,543873029 | 21,33333333 | 11,46859829 | 4833,208823 | 2053,93697  | 0,424963424 |
| <i>L. aestuarii</i> PCC 8106 | -none-         | -none- | -none- | Transglycosyl  | 0,050554441 | 0,543873029 | 20,08798646 | 12,93950815 | 337,0041706 | 430,6301941 | 1,27781859  |
| <i>L. aestuarii</i> PCC 8106 | -none-         | -none- | -none- | putative polys | 0,050630852 | 0,543873029 | 23,28030746 | 6,571185057 | 23,8100813  | 12,87723924 | 0,540831385 |
| <i>L. aestuarii</i> PCC 8106 | -none-         | -none- | -none- | hypothetical p | 0,050637526 | 0,543873029 | 22,58916788 | 8,395050682 | 3715,61571  | 1433,728926 | 0,385865772 |
| <i>L. aestuarii</i> PCC 8106 | -none-         | -none- | -none- | hypothetical p | 0,050638583 | 0,543873029 | 22,9181479  | 6,028814314 | 46,49763933 | 29,65442284 | 0,637761901 |
| <i>L. aestuarii</i> PCC 8106 | Carbohydrate   | -none- | -none- | Carboxysome    | 0,050808062 | 0,543873029 | 23,82608696 | 9,411134403 | 232,743437  | 103,700797  | 0,445558416 |
| <i>L. aestuarii</i> PCC 8106 | -none-         | -none- | -none- | Caspase-1, p   | 0,050924842 | 0,543873029 | 23,2021353  | 5,29885529  | 82,45367756 | 44,55410649 | 0,540353175 |
| <i>L. aestuarii</i> PCC 8106 | Protein Metab  | -none- | -none- | Ribosome sm    | 0,050953681 | 0,543873029 | 23,38493523 | 6,03281888  | 56,44736686 | 26,25853546 | 0,465186189 |
| <i>L. aestuarii</i> PCC 8106 | -none-         | -none- | -none- | Polysaccharic  | 0,051006516 | 0,543873029 | 23,4305351  | 3,880470176 | 76,10043829 | 62,65806961 | 0,823360167 |
| <i>L. aestuarii</i> PCC 8106 | -none-         | -none- | -none- | probable serin | 0,051103284 | 0,543873029 | 23,13348651 | 5,817743313 | 139,1263139 | 64,76270707 | 0,465495745 |
| <i>L. aestuarii</i> PCC 8106 | -none-         | -none- | -none- | D(P)H-plastoc  | 0,051324072 | 0,543873029 | 23,36842105 | 9,311150697 | 661,6922236 | 335,1528212 | 0,506508629 |
| <i>L. aestuarii</i> PCC 8106 | Carbohydrate   | -none- | -none- | Carbonic anhy  | 0,051376461 | 0,543873029 | 23,9245283  | 5,766416969 | 36,31076335 | 27,07966405 | 0,745775124 |
| <i>L. aestuarii</i> PCC 8106 | -none-         | -none- | -none- | possible sodiu | 0,051482337 | 0,543873029 | 23,17691456 | 3,843952876 | 23,63386279 | 27,92557194 | 1,181591524 |
| <i>L. aestuarii</i> PCC 8106 | -none-         | -none- | -none- | FIG00873229    | 0,051726549 | 0,543873029 | 22,95583284 | 5,148058562 | 8,102184471 | 8,133575532 | 1,003874395 |
| <i>L. aestuarii</i> PCC 8106 | -none-         | -none- | -none- | hypothetical p | 0,051791277 | 0,543873029 | 24,02547771 | 5,593832418 | 185,9321161 | 125,0476434 | 0,672544615 |
| <i>L. aestuarii</i> PCC 8106 | Fatty Acids, L | -none- | -none- | 1-hydroxy-2-n  | 0,05183716  | 0,543873029 | 23,63636364 | 8,187130298 | 59,97023744 | 37,94479789 | 0,632727158 |
| <i>L. aestuarii</i> PCC 8106 | -none-         | -none- | -none- | Inner membra   | 0,052031327 | 0,543873029 | 23,8055197  | 3,598299101 | 4,170829299 | 4,140836065 | 0,992808808 |
| <i>L. aestuarii</i> PCC 8106 | Cell Wall and  | -none- | -none- | Beta-1,3-gluc  | 0,052076715 | 0,543873029 | 23,42321703 | 5,414254041 | 15,99729935 | 11,03225499 | 0,68963234  |
| <i>L. aestuarii</i> PCC 8106 | -none-         | -none- | -none- | hypothetical p | 0,052076864 | 0,543873029 | 22,84957098 | 6,620898167 | 157,2883655 | 109,0375699 | 0,693233537 |
| <i>L. aestuarii</i> PCC 8106 | -none-         | -none- | -none- | Pentapeptide   | 0,052194202 | 0,543873029 | 23,35102178 | 4,329195033 | 23,5383057  | 17,25451467 | 0,73303979  |
| <i>L. aestuarii</i> PCC 8106 | -none-         | -none- | -none- | hypothetical p | 0,0522423   | 0,543873029 | 24,02547771 | 5,413815216 | 46,74833272 | 47,02127672 | 1,005838583 |
| <i>L. aestuarii</i> PCC 8106 | Fatty Acids, L | -none- | -none- | Phytoene deh   | 0,052289694 | 0,543873029 | 26,14452214 | 1,742807763 | 12,11890754 | 12,51695925 | 1,032845511 |
| <i>L. aestuarii</i> PCC 8106 | -none-         | -none- | -none- | methyltransfe  | 0,052329996 | 0,543873029 | 20,37389771 | 10,8870793  | 18,69314645 | 10,41567955 | 0,557192423 |
| <i>L. aestuarii</i> PCC 8106 | Cell Wall and  | -none- | -none- | dTDP-4-dehy    | 0,052389215 | 0,543873029 | 27,2516129  | 0,87510454  | 8,091087778 | 7,160032483 | 0,884928291 |
| <i>L. aestuarii</i> PCC 8106 | -none-         | -none- | -none- | hypothetical p | 0,052426169 | 0,543873029 | 23,9245283  | 5,757145215 | 8,994369713 | 7,722220111 | 0,858561562 |
| <i>L. aestuarii</i> PCC 8106 | Photosynthes   | -none- | -none- | Phycocyanin    | 0,052518965 | 0,543873029 | 24,12254412 | 3,096837331 | 65,22859369 | 53,07569759 | 0,813687596 |
| <i>L. aestuarii</i> PCC 8106 | Stress Respo   | -none- | -none- | diguanylate c  | 0,052640291 | 0,543873029 | 23,09440065 | 5,023673674 | 8,784258594 | 7,313427266 | 0,832560561 |
| <i>L. aestuarii</i> PCC 8106 | Amino Acids a  | -none- | -none- | Cyanophycin    | 0,052744505 | 0,543873029 | 24,12903226 | 5,492717625 | 97,91484098 | 60,92783025 | 0,622253273 |
| <i>L. aestuarii</i> PCC 8106 | -none-         | -none- | -none- | hypothetical p | 0,052826009 | 0,543873029 | 23,82608696 | 4,103553287 | 5,282646098 | 5,153313892 | 0,975517534 |
| <i>L. aestuarii</i> PCC 8106 | -none-         | -none- | -none- | hypothetical p | 0,052828374 | 0,543873029 | 27,1965812  | 0,119294486 | 193,455656  | 164,8676678 | 0,852224594 |
| <i>L. aestuarii</i> PCC 8106 | -none-         | -none- | -none- | hypothetical p | 0,052861311 | 0,543873029 | 23,02440976 | 5,245741506 | 8,41585539  | 6,726165727 | 0,79922544  |
| <i>L. aestuarii</i> PCC 8106 | Stress Respo   | -none- | -none- | Phytochrome    | 0,053003166 | 0,543873029 | 22,95296388 | 5,662677097 | 9,549420856 | 7,776803739 | 0,814374385 |
| <i>L. aestuarii</i> PCC 8106 | -none-         | -none- | -none- | hypothetical p | 0,053038794 | 0,543873029 | 24,02547771 | 8,403191632 | 7,153409772 | 6,953652553 | 0,972075245 |
| <i>L. aestuarii</i> PCC 8106 | -none-         | -none- | -none- | Hemerythrin H  | 0,053058665 | 0,543873029 | 20,08798646 | 12,85708487 | 2598,584885 | 1941,407975 | 0,747102004 |
| <i>L. aestuarii</i> PCC 8106 | -none-         | -none- | -none- | hypothetical p | 0,053154812 | 0,543873029 | 23,82608696 | 6,089478256 | 92,55959735 | 72,76493342 | 0,786141421 |
| <i>L. aestuarii</i> PCC 8106 | Protein Metab  | -none- | -none- | SSU ribosom    | 0,053196022 | 0,543873029 | 23,16830248 | 6,130196311 | 462,5762856 | 215,6749706 | 0,466247357 |



|                                  |                |        |          |                 |             |             |             |             |             |             |             |
|----------------------------------|----------------|--------|----------|-----------------|-------------|-------------|-------------|-------------|-------------|-------------|-------------|
| <i>L. aestuarii</i> PCC 8106     | Amino Acids a  | -none- | -none-   | DP-specific gl  | 0,053242323 | 0,543873029 | 25,67770419 | 2,075270717 | 10,11307214 | 10,21779348 | 1,010355048 |
| <i>L. aestuarii</i> PCC 8106     | Cofactors, Vit | -none- | -none-   | Gamma-tocof     | 0,053509742 | 0,543873029 | 23,63636364 | 7,836826641 | 10,03687463 | 12,10663038 | 1,206215164 |
| <i>L. aestuarii</i> PCC 8106     | Phosphorus M   | -none- | -none-   | Alkaline phos   | 0,053536228 | 0,543873029 | 23,24549149 | 5,80806655  | 6,937258743 | 3,67326338  | 0,52949782  |
| <i>L. aestuarii</i> PCC 8106     | -none-         | -none- | -none-   | Rhodanese-re    | 0,053723575 | 0,543873029 | 23,80331263 | 3,54095118  | 199,345276  | 116,1888241 | 0,582852157 |
| <i>L. aestuarii</i> PCC 8106     | -none-         | -none- | -none-   | hypothetical p  | 0,053726218 | 0,543873029 | 26,53041363 | 0,595247543 | 327,9723519 | 173,285402  | 0,528353689 |
| <i>L. aestuarii</i> PCC 8106     | Cofactors, Vit | -none- | -none-   | Pterin-4-alpha  | 0,053748858 | 0,543873029 | 21,33333333 | 13,89748889 | 1837,455516 | 1186,201271 | 0,64556734  |
| <i>L. aestuarii</i> PCC 8106     | Phosphorus M   | -none- | -none-   | Alkaline phos   | 0,053794455 | 0,543873029 | 23,28030746 | 7,117676524 | 43,0218975  | 26,06870196 | 0,605940311 |
| <i>L. aestuarii</i> PCC 8106     | Carbohydrate   | -none- | -none-   | Glycolate deh   | 0,053799076 | 0,543873029 | 23,82608696 | 8,202530912 | 28,86067994 | 18,25271245 | 0,632442219 |
| <i>L. aestuarii</i> PCC 8106     | Miscellaneous  | -none- | -none-   | Cephalospori    | 0,053809564 | 0,543873029 | 23,9245283  | 5,428573672 | 26,4074993  | 17,49572062 | 0,662528489 |
| <i>L. aestuarii</i> PCC 8106     | -none-         | -none- | -none-   | Mobile eleme    | 0,053855524 | 0,543873029 | 26,39808153 | 0,640035094 | 232,8392427 | 188,846161  | 0,811058131 |
| <i>L. aestuarii</i> PCC 8106     | -none-         | -none- | -none-   | RND multidru    | 0,053885595 | 0,543873029 | 21,33333333 | 11,64242381 | 20,98339789 | 15,7115957  | 0,748763178 |
| <i>L. aestuarii</i> PCC 8106     | -none-         | -none- | -none-   | Mobile eleme    | 0,053973783 | 0,543873029 | 22,88368539 | 5,958903573 | 36,35804049 | 31,22929679 | 0,858937841 |
| <i>L. aestuarii</i> PCC 8106     | -none-         | -none- | -none-   | hypothetical p  | 0,054049498 | 0,543873029 | 27,30735931 | 27,25862515 | 2379,063224 | 2057,735411 | 0,864935152 |
| <i>L. aestuarii</i> PCC 8106     | -none-         | -none- | -none-   | Superfamily II  | 0,054063927 | 0,543873029 | 24,23529412 | 4,841960864 | 103,6664162 | 84,72420694 | 0,817277283 |
| <i>L. aestuarii</i> PCC 8106     | -none-         | -none- | -none-   | hypothetical p  | 0,05419817  | 0,543873029 | 22,47218637 | 2,117911929 | 115,6713539 | 157,917834  | 1,365228543 |
| <i>L. aestuarii</i> PCC 8106     | -none-         | -none- | -none-   | FIG00870880     | 0,054396377 | 0,543873029 | 24,12903226 | 5,44010972  | 85,91958383 | 59,14953707 | 0,688429045 |
| <i>L. aestuarii</i> PCC 8106     | Amino Acids a  | -none- | -none-   | Acetylglutame   | 0,054493078 | 0,543873029 | 20,33658401 | 10,50721595 | 7,072403902 | 8,038522489 | 1,136603989 |
| <i>L. aestuarii</i> PCC 8106     | Protein Metab  | -none- | -none-   | GTP-binding s   | 0,054512053 | 0,543873029 | 24,23529412 | 5,277428261 | 4,764002367 | 4,641807887 | 0,974350458 |
| <i>L. aestuarii</i> PCC 8106     | Clustering-ba  | -none- | -none-   | Cytochrome c    | 0,054629192 | 0,543873029 | 23,28030746 | 5,480751501 | 6,327542376 | 3,258118294 | 0,514910545 |
| <i>L. aestuarii</i> PCC 8106     | -none-         | -none- | -none-   | Glutathione S   | 0,054629357 | 0,543873029 | 23,82608696 | 6,078654225 | 8,409172066 | 6,661000308 | 0,792111311 |
| <i>L. aestuarii</i> PCC 8106     | -none-         | -none- | -none-   | FIG00874897     | 0,054637277 | 0,543873029 | 27,2516129  | 0,197903173 | 27,69698346 | 21,04863022 | 0,759961107 |
| <i>L. aestuarii</i> PCC 8106     | -none-         | -none- | -none-   | NifU-like prote | 0,05492685  | 0,545836526 | 24,34437086 | 4,531020238 | 899,953786  | 672,4544319 | 0,747209959 |
| <i>C. chthonoplastes</i> CCY9604 | -none-         | -none- | - none - | Permeases o     | 0,032323362 | 1           | 24,68495607 | 0,766420551 | 2,503241632 | 1,706768055 | 0,681823134 |
| <i>C. chthonoplastes</i> CCY9604 | -none-         | -none- | -none-   | ISSoc5, trans   | 0,035171385 | 1           | 23,86374696 | 1,058866459 | 5,886194264 | 5,419273005 | 0,920675187 |
| <i>C. chthonoplastes</i> CCY9604 | -none-         | -none- | - none - | FIG00873841     | 0,045989436 | 1           | 26,26950355 | 1,298557734 | 84,71140894 | 37,06288453 | 0,437519397 |
| <i>C. chthonoplastes</i> CCY9604 | -none-         | -none- | - none - | serine/threoni  | 0,004490733 | 1           | 24,68965517 | 2,005979959 | 11,95383422 | 8,398454557 | 0,70257412  |
| <i>C. chthonoplastes</i> CCY9604 | -none-         | -none- | - none - | hypothetical p  | 0,050997008 | 1           | 23,6882599  | 2,431145332 | 940,6152245 | 557,2992554 | 0,592483771 |
| <i>C. chthonoplastes</i> CCY9604 | -none-         | -none- | -none-   | ISSoc3, orfA    | 0,002464529 | 1           | 24,34437086 | 2,795704496 | 17,66108004 | 7,64426743  | 0,432831255 |
| <i>C. chthonoplastes</i> CCY9604 | -none-         | -none- | - none - | hypothetical p  | 0,004426824 | 1           | 24,45637584 | 2,804800327 | 9,004860695 | 7,017747054 | 0,779328775 |
| <i>C. chthonoplastes</i> CCY9604 | -none-         | -none- | - none - | hypothetical p  | 0,010232391 | 1           | 24,12254412 | 2,855532008 | 13,33540457 | 11,70919322 | 0,878053092 |
| <i>C. chthonoplastes</i> CCY9604 | -none-         | -none- | - none - | Alkyl hydrope   | 0,033213573 | 1           | 24,02547771 | 2,900938276 | 73,48138323 | 34,10400519 | 0,464117627 |
| <i>C. chthonoplastes</i> CCY9604 | -none-         | -none- | - none - | hypothetical p  | 0,022264594 | 1           | 23,53439002 | 3,179962096 | 37,90610322 | 17,14866508 | 0,452398522 |
| <i>C. chthonoplastes</i> CCY9604 | -none-         | -none- | - none - | hypothetical p  | 0,033253944 | 1           | 24,21813812 | 3,518232504 | 24,48659844 | 21,61503899 | 0,882729345 |
| <i>C. chthonoplastes</i> CCY9604 | -none-         | -none- | - none - | Beta-lactama    | 0,042292011 | 1           | 22,95583284 | 3,553705042 | 2,500454469 | 3,144338116 | 1,257506647 |
| <i>C. chthonoplastes</i> CCY9604 | -none-         | -none- | - none - | hypothetical p  | 0,034668409 | 1           | 23,28030746 | 3,634224071 | 10,90746152 | 7,013923453 | 0,643039028 |
| <i>C. chthonoplastes</i> CCY9604 | -none-         | -none- | - none - | hypothetical p  | 0,015901821 | 1           | 22,32313081 | 3,704379611 | 49,03805195 | 21,6702127  | 0,441906068 |
| <i>C. chthonoplastes</i> CCY9604 | -none-         | -none- | - none - | hypothetical p  | 0,032463675 | 1           | 24,23529412 | 3,704938316 | 7,530548315 | 5,761559155 | 0,765091586 |
| <i>C. chthonoplastes</i> CCY9604 | -none-         | -none- | - none - | hypothetical p  | 0,010404888 | 1           | 23,25736176 | 3,722366807 | 9,478763238 | 8,291799877 | 0,874776558 |
| <i>C. chthonoplastes</i> CCY9604 | -none-         | -none- | - none - | hypothetical p  | 0,001089062 | 1           | 23,31121205 | 3,788995496 | 4,972201557 | 4,779342252 | 0,961212493 |

|                                  |        |        |                   |                 |             |   |             |             |             |             |             |
|----------------------------------|--------|--------|-------------------|-----------------|-------------|---|-------------|-------------|-------------|-------------|-------------|
| <i>C. chthonoplastes</i> CCY9604 | -none- | -none- | Chorismate: Inter | Isochorismate   | 0,052820685 | 1 | 22,65001858 | 3,84502697  | 14,36956251 | 7,228575576 | 0,503047714 |
| <i>C. chthonoplastes</i> CCY9604 | -none- | -none- | Bacterial Cell Di | Chromosome      | 0,034736717 | 1 | 23,35102178 | 3,937420604 | 9,209715353 | 8,283350682 | 0,899414408 |
| <i>C. chthonoplastes</i> CCY9604 | -none- | -none- | - none -          | Fe-S cluster p  | 0,001723257 | 1 | 22,92012365 | 4,122104762 | 32,63559813 | 28,60812069 | 0,876592504 |
| <i>C. chthonoplastes</i> CCY9604 | -none- | -none- | - none -          | hypothetical p  | 0,021715017 | 1 | 23,03113803 | 4,151693507 | 29,96406577 | 16,02057196 | 0,534659485 |
| <i>C. chthonoplastes</i> CCY9604 | -none- | -none- | - none -          | hypothetical p  | 0,012301807 | 1 | 22,88368539 | 4,358222963 | 19,70914335 | 12,73929593 | 0,646364771 |
| <i>C. chthonoplastes</i> CCY9604 | -none- | -none- | - none -          | hypothetical p  | 0,033276769 | 1 | 23,82608696 | 4,51657765  | 18,37350856 | 13,96262587 | 0,759932477 |
| <i>C. chthonoplastes</i> CCY9604 | -none- | -none- | - none -          | hypothetical p  | 0,02962942  | 1 | 24,02547771 | 4,682920241 | 14,57035521 | 9,897928593 | 0,679319649 |
| <i>C. chthonoplastes</i> CCY9604 | -none- | -none- | - none -          | hypothetical p  | 0,022014963 | 1 | 24,23529412 | 4,727618975 | 9,887649272 | 12,93296167 | 1,307991548 |
| <i>C. chthonoplastes</i> CCY9604 | -none- | -none- | -none-            | Two compone     | 0,03826084  | 1 | 23,82608696 | 4,798890874 | 10,11210838 | 4,523720859 | 0,447356841 |
| <i>C. chthonoplastes</i> CCY9604 | -none- | -none- | - none -          | DUF89 doma      | 0,017172519 | 1 | 24,12903226 | 4,986466434 | 3,464199795 | 2,244474335 | 0,647905568 |
| <i>C. chthonoplastes</i> CCY9604 | -none- | -none- | - none -          | hypothetical p  | 0,0167957   | 1 | 23,02440976 | 5,059521454 | 2,443555422 | 3,370850401 | 1,379485962 |
| <i>C. chthonoplastes</i> CCY9604 | -none- | -none- | - none -          | Pheophorbide    | 0,01575269  | 1 | 23,02440976 | 5,089053238 | 0,891379131 | 1,227744108 | 1,227744108 |
| <i>C. chthonoplastes</i> CCY9604 | -none- | -none- | - none -          | Sensory box/c   | 0,030659669 | 1 | 22,81579943 | 5,111650734 | 14,15227303 | 5,82274514  | 0,411435331 |
| <i>C. chthonoplastes</i> CCY9604 | -none- | -none- | - none -          | Pentapeptide    | 0,006889547 | 1 | 22,74601643 | 5,115692673 | 9,546537318 | 4,805629569 | 0,503389806 |
| <i>C. chthonoplastes</i> CCY9604 | -none- | -none- | CBSS-349161.4     | D primase (E    | 0,02924705  | 1 | 24,12903226 | 5,156770081 | 0,56936814  | 0,562434951 | 0,562434951 |
| <i>C. chthonoplastes</i> CCY9604 | -none- | -none- | - none -          | hypothetical p  | 0,00539948  | 1 | 23,2021353  | 5,464528913 | 20,96464065 | 16,15359449 | 0,770516164 |
| <i>C. chthonoplastes</i> CCY9604 | -none- | -none- | R methylation; <  | tR (guanine46   | 0,001849869 | 1 | 22,71224488 | 5,507782033 | 5,17208913  | 4,211060659 | 0,814189499 |
| <i>C. chthonoplastes</i> CCY9604 | -none- | -none- | - none -          | hypothetical p  | 0,048424387 | 1 | 23,9245283  | 5,542532228 | 7,529916022 | 6,230046513 | 0,827372642 |
| <i>C. chthonoplastes</i> CCY9604 | -none- | -none- | - none -          | FIG00872464     | 0,004131071 | 1 | 22,81579943 | 5,667956212 | 8,361685789 | 6,818813585 | 0,815483116 |
| <i>C. chthonoplastes</i> CCY9604 | -none- | -none- | -none-            | Glutathione S   | 0,004978072 | 1 | 22,81579943 | 5,687295962 | 35,77529567 | 18,0739725  | 0,505208194 |
| <i>C. chthonoplastes</i> CCY9604 | -none- | -none- | - none -          | hypothetical p  | 0,040446488 | 1 | 22,81579943 | 6,50267323  | 11,63641703 | 3,582933125 | 0,307906903 |
| <i>C. chthonoplastes</i> CCY9604 | -none- | -none- | -none-            | ATPase, E1-E    | 0,033645614 | 1 | 22,84957098 | 6,66045646  | 4,784469045 | 2,286987701 | 0,478002403 |
| <i>C. chthonoplastes</i> CCY9604 | -none- | -none- | - none -          | UPF0272 pro     | 0,044215446 | 1 | 24,12903226 | 6,7390318   | 6,45702133  | 4,127298937 | 0,639195494 |
| <i>C. chthonoplastes</i> CCY9604 | -none- | -none- | - none -          | hypothetical p  | 0,052302992 | 1 | 24,12903226 | 6,936281172 | 12,9560187  | 16,48289169 | 1,272218887 |
| <i>C. chthonoplastes</i> CCY9604 | -none- | -none- | CBSS-84588.1.     | D-alanyl-D-ala  | 0,04336741  | 1 | 23,9245283  | 7,148463423 | 2,702694838 | 1,408834143 | 0,52127015  |
| <i>C. chthonoplastes</i> CCY9604 | -none- | -none- | -none-            | Cell division t | 0,045151888 | 1 | 23,51173776 | 7,270980969 | 23,11074444 | 10,07904261 | 0,43611934  |
| <i>C. chthonoplastes</i> CCY9604 | -none- | -none- | - none -          | Glycosyltrans   | 0,004217133 | 1 | 22,81579943 | 7,574812132 | 3,43004414  | 2,573051807 | 0,750151223 |
| <i>C. chthonoplastes</i> CCY9604 | -none- | -none- | - none -          | N-acetylmann    | 0,03567109  | 1 | 23,9245283  | 7,588719864 | 5,850425749 | 5,52832365  | 0,944943819 |
| <i>C. chthonoplastes</i> CCY9604 | -none- | -none- | - none -          | hypothetical p  | 0,011061136 | 1 | 24,02547771 | 7,954980884 | 7,556268678 | 6,136268026 | 0,812076474 |
| <i>C. chthonoplastes</i> CCY9604 | -none- | -none- | - none -          | hypothetical p  | 0,019694354 | 1 | 23,82608696 | 8,10794998  | 2,764905453 | 3,631404821 | 1,313392043 |
| <i>C. chthonoplastes</i> CCY9604 | -none- | -none- | - none -          | Putative trans  | 0,054773931 | 1 | 23,63636364 | 8,188903836 | 3,909662123 | 3,614138844 | 0,924412067 |
| <i>C. chthonoplastes</i> CCY9604 | -none- | -none- | - none -          | hypothetical p  | 0,025134366 | 1 | 23,82608696 | 8,340989112 | 3,325645247 | 4,021136156 | 1,209129615 |
| <i>C. chthonoplastes</i> CCY9604 | -none- | -none- | - none -          | FIG00875368     | 0,044601256 | 1 | 22,24473695 | 8,631692685 | 49,86126066 | 46,38381656 | 0,930257598 |
| <i>C. chthonoplastes</i> CCY9604 | -none- | -none- | - none -          | hypothetical p  | 0,027510447 | 1 | 23,73006135 | 8,951521943 | 12,72403195 | 12,36600635 | 0,971862252 |
| <i>C. chthonoplastes</i> CCY9604 | -none- | -none- | - none -          | hypothetical p  | 0,037186212 | 1 | 22,7207329  | 9,09887268  | 7,126031125 | 9,839967326 | 1,38084821  |
| <i>C. chthonoplastes</i> CCY9604 | -none- | -none- | -none-            | 2-methyl-6-ph   | 0,0145899   | 1 | 24,68449198 | 9,174953444 | 14,19414524 | 8,95033942  | 0,63056558  |
| <i>C. chthonoplastes</i> CCY9604 | -none- | -none- | - none -          | hypothetical p  | 0,054653694 | 1 | 27,53777778 | 9,451453678 | 8,108490327 | 8,598482888 | 1,060429567 |
| <i>C. chthonoplastes</i> CCY9604 | -none- | -none- | - none -          | FIG00562468     | 0,014499002 | 1 | 25,67770419 | 9,475914679 | 47,72960918 | 44,65165841 | 0,93551276  |
| <i>C. chthonoplastes</i> CCY9604 | -none- | -none- | - none -          | hypothetical p  | 0,028358008 | 1 | 25,97197312 | 9,503152835 | 3,923342058 | 4,103897719 | 1,046020882 |

|                                  |        |        |                  |                |             |   |             |             |             |             |             |
|----------------------------------|--------|--------|------------------|----------------|-------------|---|-------------|-------------|-------------|-------------|-------------|
| <i>C. chthonoplastes</i> CCY9604 | -none- | -none- | Bacterial hemog  | diguanylate c  | 0,001332157 | 1 | 23,03113803 | 9,991054614 | 1,304689253 | 1,195345091 | 0,916191414 |
| <i>C. chthonoplastes</i> CCY9604 | -none- | -none- | - none -         | FIG00565239    | 0,05032273  | 1 | 21,85208709 | 10,04980722 | 10,76325523 | 4,354845176 | 0,404602983 |
| <i>C. chthonoplastes</i> CCY9604 | -none- | -none- | - none -         | Methyl-accept  | 0,033548861 | 1 | 21,68723228 | 10,20047601 | 3,563324993 | 4,418212881 | 1,239912972 |
| <i>C. chthonoplastes</i> CCY9604 | -none- | -none- | -none-           | RND efflux sy  | 0,012324195 | 1 | 24,72026473 | 10,22102172 | 2,891644247 | 2,728664807 | 0,943637797 |
| <i>C. chthonoplastes</i> CCY9604 | -none- | -none- | - none -         | hypothetical p | 0,04724848  | 1 | 23,27492642 | 10,42654445 | 0,697391716 | 0,740755665 | 0,740755665 |
| <i>C. chthonoplastes</i> CCY9604 | -none- | -none- | Methionine Bios  | Methionine Al  | 0,053582873 | 1 | 23,57625492 | 10,6845553  | 7,923228545 | 8,625239904 | 1,08860168  |
| <i>C. chthonoplastes</i> CCY9604 | -none- | -none- | - none -         | FIG00557799    | 0,018042761 | 1 | 22,67918143 | 10,75522492 | 2,314428685 | 1,331777725 | 0,575423962 |
| <i>C. chthonoplastes</i> CCY9604 | -none- | -none- | - none -         | COG3210: La    | 0,001352104 | 1 | 22,54662568 | 10,76681033 | 2,067562839 | 1,609091721 | 0,778255292 |
| <i>C. chthonoplastes</i> CCY9604 | -none- | -none- | -none-           | D-glycerate 3  | 0,048108543 | 1 | 27,65765766 | 11,29070209 | 1,011437652 | 0,915714077 | 0,905358897 |
| <i>C. chthonoplastes</i> CCY9604 | -none- | -none- | -none-           | Helicase, SNF  | 0,015614033 | 1 | 21,0983654  | 11,34248432 | 0,975249323 | 1,220415472 | 1,220415472 |
| <i>C. chthonoplastes</i> CCY9604 | -none- | -none- | - none -         | hypothetical p | 0,016385437 | 1 | 22,01329001 | 11,39388749 | 6,598802553 | 3,848829157 | 0,583261755 |
| <i>C. chthonoplastes</i> CCY9604 | -none- | -none- | - none -         | hypothetical p | 0,052389176 | 1 | 20,76722533 | 11,46298916 | 2,955176524 | 3,883582857 | 1,314162733 |
| <i>C. chthonoplastes</i> CCY9604 | -none- | -none- | - none -         | FOG: TPR re    | 0,011133704 | 1 | 21,05752235 | 11,47504969 | 4,238171268 | 5,269190413 | 1,243269816 |
| <i>C. chthonoplastes</i> CCY9604 | -none- | -none- | - none -         | hypothetical p | 0,005301571 | 1 | 26,95235455 | 11,51951101 | 15,96092623 | 11,61078527 | 0,727450594 |
| <i>C. chthonoplastes</i> CCY9604 | -none- | -none- | Soluble cytochr  | soluble [2Fe-2 | 0,006078124 | 1 | 21,17802198 | 11,57024749 | 2,947065716 | 3,609874236 | 1,224904561 |
| <i>C. chthonoplastes</i> CCY9604 | -none- | -none- | - none -         | DUF124 dom     | 0,050800747 | 1 | 20,68508287 | 11,58530015 | 1,73789853  | 2,289185734 | 1,31721484  |
| <i>C. chthonoplastes</i> CCY9604 | -none- | -none- | CBSS-176299.4    | Sigl peptidase | 0,049972188 | 1 | 20,64468864 | 11,63490393 | 0,54681935  | 0,721100797 | 0,721100797 |
| <i>C. chthonoplastes</i> CCY9604 | -none- | -none- | - none -         | endopeptidas   | 0,041920246 | 1 | 20,68508287 | 11,76134352 | 2,220400533 | 2,901332932 | 1,306670976 |
| <i>C. chthonoplastes</i> CCY9604 | -none- | -none- | Beta-lactamase   | Metal-depend   | 0,029635737 | 1 | 22,17185991 | 11,90906502 | 2,00125802  | 2,417546416 | 1,208013355 |
| <i>C. chthonoplastes</i> CCY9604 | -none- | -none- | CBSS-176299.4    | Ribonuclease   | 0,035203872 | 1 | 25,30759994 | 11,93376477 | 3,123355787 | 3,578083544 | 1,145589484 |
| <i>C. chthonoplastes</i> CCY9604 | -none- | -none- | - none -         | hypothetical p | 0,000326879 | 1 | 20,8445496  | 11,98563001 | 4,213734173 | 5,080647533 | 1,20573518  |
| <i>C. chthonoplastes</i> CCY9604 | -none- | -none- | - none -         | hypothetical p | 0,027780563 | 1 | 25,59834369 | 12,03768533 | 4,787677162 | 4,079519811 | 0,852087489 |
| <i>C. chthonoplastes</i> CCY9604 | -none- | -none- | - none -         | membrane-sp    | 0,031020084 | 1 | 23,3984904  | 12,20638679 | 9,305601557 | 2,599947803 | 0,279395995 |
| <i>C. chthonoplastes</i> CCY9604 | -none- | -none- | - none -         | pentapeptide   | 0,009614999 | 1 | 27,4790287  | 12,60012784 | 1,26504461  | 1,162963766 | 0,919306527 |
| <i>C. chthonoplastes</i> CCY9604 | -none- | -none- | - none -         | POSSIBLE C     | 0,007387684 | 1 | 25,53711474 | 12,63054017 | 1,351492249 | 1,539325646 | 1,138982223 |
| <i>C. chthonoplastes</i> CCY9604 | -none- | -none- | - none -         | hypothetical p | 0,028518476 | 1 | 23,54336848 | 12,73466947 | 5,931271893 | 6,313287809 | 1,064407082 |
| <i>C. chthonoplastes</i> CCY9604 | -none- | -none- | - none -         | hypothetical p | 0,028426695 | 1 | 21,49262104 | 12,76722837 | 6,630291061 | 5,362816681 | 0,808835786 |
| <i>C. chthonoplastes</i> CCY9604 | -none- | -none- | - none -         | Leucine-rich r | 0,009654062 | 1 | 22,98994725 | 12,87435661 | 0,827208066 | 0,922514485 | 0,922514485 |
| <i>C. chthonoplastes</i> CCY9604 | -none- | -none- | - none -         | hypothetical p | 0,004146093 | 1 | 21,3016532  | 13,00354568 | 3,004031183 | 3,642156287 | 1,212422929 |
| <i>C. chthonoplastes</i> CCY9604 | -none- | -none- | - none -         | hypothetical p | 0,028744334 | 1 | 21,33333333 | 13,05195472 | 1,158808512 | 1,271030358 | 1,096842442 |
| <i>C. chthonoplastes</i> CCY9604 | -none- | -none- | - none -         | hypothetical p | 0,014771243 | 1 | 23,31121205 | 19,42017635 | 3,726337541 | 3,791752815 | 1,017554844 |
| <i>C. chthonoplastes</i> CCY9604 | -none- | -none- | RuvABC plus a    | Holliday junct | 0,032560817 | 1 | 24,02547771 | 20,8757458  | 4,03148866  | 3,214762578 | 0,797413276 |
| <i>C. chthonoplastes</i> CCY9604 | -none- | -none- | - none -         | 3-demethylub   | 0,034194204 | 1 | 24,01697053 | 21,03604172 | 2,284763559 | 2,404309859 | 1,05232327  |
| <i>C. chthonoplastes</i> CCY9604 | -none- | -none- | Entner-Doudoro   | Pyruvate kise  | 0,041182511 | 1 | 24,45637584 | 21,39451426 | 0,47933206  | 0,516196601 | 0,516196601 |
| <i>C. chthonoplastes</i> CCY9604 | -none- | -none- | - none -         | hypothetical p | 0,028707831 | 1 | 24,77925268 | 22,08529812 | 3,280614043 | 4,304839314 | 1,312205355 |
| <i>C. chthonoplastes</i> CCY9604 | -none- | -none- | Bacterial hemog  | diguanylate c  | 0,048663004 | 1 | 26,14452214 | 22,28131358 | 1,822220564 | 1,98714871  | 1,090509431 |
| <i>C. chthonoplastes</i> CCY9604 | -none- | -none- | - none -         | hypothetical p | 0,029281641 | 1 | 23,96402116 | 23,23134232 | 19,23155207 | 7,8682049   | 0,40913     |
| <i>C. chthonoplastes</i> CCY9604 | -none- | -none- | Pyridoxin (Vitam | D-3-phosphog   | 0,037658042 | 1 | 25,33333333 | 23,73528467 | 6,292550629 | 2,939554377 | 0,467148308 |
| <i>C. chthonoplastes</i> CCY9604 | -none- | -none- | - none -         | hypothetical p | 0,053054033 | 1 | 27,08860759 | 24,07162011 | 2,145692754 | 2,611320344 | 1,217005715 |

|                                  |                |        |                 |                 |             |             |             |             |             |             |             |
|----------------------------------|----------------|--------|-----------------|-----------------|-------------|-------------|-------------|-------------|-------------|-------------|-------------|
| <i>C. chthonoplastes</i> CCY9604 | -none-         | -none- | - none -        | hypothetical p  | 0,002987371 | 1           | 26,7804878  | 24,64516467 | 3,581763679 | 3,632000738 | 1,014025788 |
| <i>C. chthonoplastes</i> CCY9604 | -none-         | -none- | Bacterial hemog | diguanylate c   | 0,044034194 | 1           | 27,42105263 | 24,74156492 | 4,322795377 | 2,329455285 | 0,538877065 |
| <i>C. chthonoplastes</i> CCY9604 | -none-         | -none- | -none-          | Membrane pr     | 0,02296059  | 1           | 27,2516129  | 24,97107374 | 9,070328345 | 8,397376564 | 0,925807341 |
| <i>C. chthonoplastes</i> CCY9604 | -none-         | -none- | - none -        | FIG00873771     | 0,005739387 | 1           | 27,59731544 | 24,97333084 | 4,38414908  | 2,060817767 | 0,470061061 |
| <i>C. chthonoplastes</i> CCY9604 | -none-         | -none- | SufS subfamily  | Cysteine desu   | 0,045500508 | 1           | 27,78082192 | 25,01541778 | 1,745396042 | 1,479017112 | 0,847381956 |
| <i>C. chthonoplastes</i> CCY9604 | -none-         | -none- | - none -        | hypothetical p  | 0,001274842 | 1           | 27,08860759 | 25,64981809 | 18,1241929  | 14,12968439 | 0,77960351  |
| <i>C. chthonoplastes</i> CCY9604 | -none-         | -none- | - none -        | hypothetical p  | 0,041347012 | 1           | 26,66666667 | 25,71935316 | 8,383458881 | 5,582909481 | 0,665943444 |
| <i>C. chthonoplastes</i> CCY9604 | -none-         | -none- | -none-          | Octaprenyl di   | 0,015316785 | 1           | 27,2516129  | 25,74233639 | 2,665897534 | 3,299410719 | 1,237635984 |
| <i>C. chthonoplastes</i> CCY9604 | -none-         | -none- | - none -        | hypothetical p  | 0,038976807 | 1           | 26,98333333 | 26,95014123 | 4,676288912 | 5,105638894 | 1,091814255 |
| <i>C. chthonoplastes</i> CCY9604 | -none-         | -none- | - none -        | FIG01020901     | 0,021300943 | 1           | 27,4790287  | 27,03125133 | 12,75866375 | 11,54734217 | 0,905058899 |
| <i>R. denitrificans</i> OCh 114  | Stress Respo   | -none- | -none-          | Heat-inducibl   | 0,017538592 | 0,296501487 | 24,93851546 | 0,00240851  | 0,708553249 | 0,956734226 | 0,956734226 |
| <i>R. denitrificans</i> OCh 114  | -none-         | -none- | -none-          | COG2740: Pr     | 0,001695507 | 0,120568452 | 27,1965812  | 0,005910891 | 10,21297465 | 10,8849219  | 1,065793491 |
| <i>R. denitrificans</i> OCh 114  | Cofactors, Vit | -none- | -none-          | Ferrochelatas   | 0,012243735 | 0,261199672 | 26,7804878  | 0,016432906 | 1,445346214 | 0,947393621 | 0,655478675 |
| <i>R. denitrificans</i> OCh 114  | Respiration    | -none- | -none-          | DH-ubiquinon    | 0,016639959 | 0,292996759 | 24,56342243 | 0,187544124 | 3,023339019 | 3,982580567 | 1,317278857 |
| <i>R. denitrificans</i> OCh 114  | -none-         | -none- | -none-          | Catalase (EC    | 0,031100235 | 0,449448555 | 27,11535986 | 0,206254907 | 1,178615901 | 1,188857842 | 1,008689804 |
| <i>R. denitrificans</i> OCh 114  | Protein Metab  | -none- | -none-          | LSU ribosoma    | 0,004656218 | 0,177500001 | 24,65771904 | 0,28545193  | 8,417750453 | 6,905714391 | 0,820375281 |
| <i>R. denitrificans</i> OCh 114  | Protein Metab  | -none- | -none-          | LSU ribosoma    | 0,004754464 | 0,177500001 | 26,53041363 | 0,438402241 | 6,300808325 | 6,858571864 | 1,088522537 |
| <i>R. denitrificans</i> OCh 114  | Respiration    | -none- | -none-          | Formate dehy    | 0,045017757 | 0,557976455 | 26,26950355 | 0,490995103 | 4,114290404 | 3,389345614 | 0,823798342 |
| <i>R. denitrificans</i> OCh 114  | Protein Metab  | -none- | -none-          | GTP-binding p   | 0,002001481 | 0,128094815 | 25,83623698 | 0,534253399 | 0,94517551  | 1,118220918 | 1,118220918 |
| <i>R. denitrificans</i> OCh 114  | Respiration    | -none- | -none-          | Cytochrome c    | 0,041381499 | 0,529683191 | 25,9047619  | 0,589458951 | 14,98707248 | 12,13664192 | 0,809807382 |
| <i>R. denitrificans</i> OCh 114  | Photosynthes   | -none- | -none-          | Photosyntheti   | 0,009553011 | 0,251676499 | 27,14225053 | 0,68638802  | 7,898555772 | 10,45256613 | 1,323351563 |
| <i>R. denitrificans</i> OCh 114  | -none-         | -none- | -none-          | FIG005935: n    | 0,03340312  | 0,46118649  | 22,27049527 | 0,791600728 | 8,014226368 | 4,217005103 | 0,526189916 |
| <i>R. denitrificans</i> OCh 114  | Cofactors, Vit | -none- | -none-          | Chlorophyllide  | 0,000156568 | 0,070142466 | 25,4568805  | 0,797150146 | 98,07566821 | 98,31891747 | 1,00248022  |
| <i>R. denitrificans</i> OCh 114  | Carbohydrate   | -none- | -none-          | Succinyl-CoA    | 0,006199175 | 0,205720766 | 21,55617996 | 1,191315201 | 1,258133555 | 1,49599051  | 1,18905541  |
| <i>R. denitrificans</i> OCh 114  | Carbohydrate   | -none- | -none-          | Citrate syntha  | 0,003725296 | 0,158945951 | 25,25487256 | 1,246715133 | 1,583344582 | 1,302955125 | 0,82291318  |
| <i>R. denitrificans</i> OCh 114  | Respiration    | -none- | -none-          | Cytochrome c    | 0,01179541  | 0,257772868 | 21,28959103 | 1,288178223 | 1,100456482 | 1,196266794 | 1,087064153 |
| <i>R. denitrificans</i> OCh 114  | Amino Acids a  | -none- | -none-          | D-3-phosphog    | 0,017004276 | 0,292996759 | 22,06202686 | 1,39279558  | 0,804065822 | 0,850453325 | 0,850453325 |
| <i>R. denitrificans</i> OCh 114  | -none-         | -none- | -none-          | LSU ribosoma    | 0,010061086 | 0,251676499 | 20,05387205 | 1,440681159 | 4,9082649   | 4,922745737 | 1,002950296 |
| <i>R. denitrificans</i> OCh 114  | -none-         | -none- | -none-          | Translation in  | 0,011567371 | 0,257772868 | 21,01712812 | 1,599511089 | 4,115199895 | 3,579784817 | 0,8698933   |
| <i>R. denitrificans</i> OCh 114  | Cofactors, Vit | -none- | -none-          | Mg protoporpi   | 0,027294694 | 0,436715099 | 24,32876281 | 1,62046377  | 3,077767063 | 3,811635459 | 1,238441825 |
| <i>R. denitrificans</i> OCh 114  | R Metabolism   | -none- | -none-          | ATP-depende     | 0,002168884 | 0,129554674 | 23,35162274 | 1,733574564 | 2,455586647 | 3,120530917 | 1,270788356 |
| <i>R. denitrificans</i> OCh 114  | D Metabolism   | -none- | -none-          | RecA protein    | 0,007411454 | 0,2075207   | 24,64664164 | 2,036837259 | 2,85502811  | 2,448987152 | 0,857780399 |
| <i>R. denitrificans</i> OCh 114  | Phages, Prop   | -none- | -none-          | Iron-sulfur clu | 0,035992365 | 0,481330737 | 20,05387205 | 2,09427249  | 3,772645295 | 3,525665995 | 0,934534185 |
| <i>R. denitrificans</i> OCh 114  | -none-         | -none- | -none-          | polyamine AB    | 0,014232636 | 0,277226996 | 24,64664164 | 2,308638096 | 2,151533504 | 1,562233823 | 0,726102485 |
| <i>R. denitrificans</i> OCh 114  | -none-         | -none- | -none-          | CarD-like tran  | 0,001222574 | 0,100869685 | 21,83918279 | 2,361114281 | 45,08370041 | 39,61682577 | 0,878739443 |
| <i>R. denitrificans</i> OCh 114  | Photosynthes   | -none- | -none-          | Photosyntheti   | 0,009419018 | 0,251676499 | 23,65572617 | 2,580462729 | 12,88115658 | 15,08564741 | 1,171140753 |
| <i>R. denitrificans</i> OCh 114  | -none-         | -none- | -none-          | FIG01023856     | 0,030246619 | 0,449448555 | 24,81118881 | 2,612214957 | 3,534084703 | 4,893962233 | 1,384789173 |
| <i>R. denitrificans</i> OCh 114  | Cofactors, Vit | -none- | -none-          | Chlorophyllide  | 0,00519525  | 0,186197748 | 24,12254412 | 2,652694142 | 4,570006798 | 5,83110712  | 1,27595152  |
| <i>R. denitrificans</i> OCh 114  | Protein Metab  | -none- | -none-          | Chaperone pr    | 0,01067378  | 0,251676499 | 20,76722533 | 2,66025016  | 11,33324807 | 8,262244759 | 0,729027081 |

|                                 |                 |        |        |                 |             |             |             |             |             |             |             |
|---------------------------------|-----------------|--------|--------|-----------------|-------------|-------------|-------------|-------------|-------------|-------------|-------------|
| <i>R. denitrificans</i> OCh 114 | Carbohydrate    | -none- | -none- | Aconitate hyd   | 0,014061146 | 0,277226996 | 20,85122411 | 2,758709431 | 1,406482208 | 1,41152944  | 1,00358855  |
| <i>R. denitrificans</i> OCh 114 | -none-          | -none- | -none- | Preprotein tra  | 5,01002E-05 | 0,04488981  | 21,38031061 | 2,780635914 | 1,443545778 | 1,252619501 | 0,867737982 |
| <i>R. denitrificans</i> OCh 114 | -none-          | -none- | -none- | Aspartyl-tR(A   | 0,001238356 | 0,100869685 | 22,23890703 | 2,92390428  | 0,589385594 | 0,592767739 | 0,592767739 |
| <i>R. denitrificans</i> OCh 114 | -none-          | -none- | -none- | Porin           | 0,004586736 | 0,177500001 | 23,57224037 | 2,935055712 | 8,358080965 | 9,390038323 | 1,123468217 |
| <i>R. denitrificans</i> OCh 114 | -none-          | -none- | -none- | Formate dehy    | 0,000720477 | 0,100869685 | 21,94252516 | 3,022113189 | 6,97014777  | 6,594705099 | 0,946135622 |
| <i>R. denitrificans</i> OCh 114 | Protein Metab   | -none- | -none- | SSU ribosoma    | 0,048783679 | 0,564442943 | 21,33333333 | 3,096425661 | 20,82605097 | 17,79206733 | 0,854317862 |
| <i>R. denitrificans</i> OCh 114 | -none-          | -none- | -none- | Cold shock pr   | 0,011121252 | 0,25550364  | 21,94252516 | 3,112567184 | 155,7508585 | 199,2580389 | 1,279338302 |
| <i>R. denitrificans</i> OCh 114 | Protein Metab   | -none- | -none- | LSU ribosoma    | 0,048341439 | 0,564442943 | 20,68508287 | 3,129994393 | 15,37922126 | 14,5151724  | 0,943817125 |
| <i>R. denitrificans</i> OCh 114 | -none-          | -none- | -none- | hypothetical p  | 0,033456609 | 0,46118649  | 21,33333333 | 3,244570737 | 2108,064652 | 1817,93713  | 0,862372569 |
| <i>R. denitrificans</i> OCh 114 | Protein Metab   | -none- | -none- | ATP-depende     | 0,024174053 | 0,401110211 | 22,75664251 | 3,306338132 | 1,552644463 | 1,000231451 | 0,644211521 |
| <i>R. denitrificans</i> OCh 114 | Protein Metab   | -none- | -none- | SSU ribosoma    | 0,006083157 | 0,205720766 | 23,12994006 | 3,35125904  | 20,63590874 | 24,26445883 | 1,1758367   |
| <i>R. denitrificans</i> OCh 114 | Respiration     | -none- | -none- | Ubiquinol--cyt  | 0,010543822 | 0,251676499 | 21,97787871 | 3,365001019 | 7,273834775 | 8,01430618  | 1,101799316 |
| <i>R. denitrificans</i> OCh 114 | Protein Metab   | -none- | -none- | LSU ribosoma    | 0,046648713 | 0,564442943 | 23,80715412 | 3,405478707 | 11,10538561 | 13,37448547 | 1,204324275 |
| <i>R. denitrificans</i> OCh 114 | Protein Metab   | -none- | -none- | LSU ribosoma    | 0,029319065 | 0,449448555 | 23,73006135 | 3,433633019 | 24,12064164 | 25,33821372 | 1,050478429 |
| <i>R. denitrificans</i> OCh 114 | Cell Division a | -none- | -none- | SSU ribosoma    | 0,044368446 | 0,557976455 | 21,33333333 | 3,434055437 | 884,3237915 | 732,2452867 | 0,828028482 |
| <i>R. denitrificans</i> OCh 114 | Photosynthes    | -none- | -none- | Light-harvesti  | 0,007133223 | 0,20750534  | 21,02356902 | 3,442404099 | 198,4826724 | 224,9636823 | 1,133417238 |
| <i>R. denitrificans</i> OCh 114 | -none-          | -none- | -none- | Cold shock pr   | 0,052871258 | 0,59215809  | 22,04389391 | 3,453603706 | 59,72412004 | 74,94051625 | 1,254778073 |
| <i>R. denitrificans</i> OCh 114 | Clustering-ba   | -none- | -none- | Polyribonucle   | 0,049622086 | 0,564442943 | 24,02547771 | 3,468773914 | 18,08454496 | 22,15144588 | 1,224882679 |
| <i>R. denitrificans</i> OCh 114 | Protein Metab   | -none- | -none- | SSU ribosoma    | 0,049766733 | 0,564442943 | 23,54491018 | 3,475616295 | 41,49920905 | 41,12680441 | 0,991026223 |
| <i>R. denitrificans</i> OCh 114 | Amino Acids a   | -none- | -none- | Serine hydrox   | 0,001749319 | 0,120568452 | 20,98979747 | 3,486307352 | 1,523900661 | 1,828446664 | 1,199846362 |
| <i>R. denitrificans</i> OCh 114 | Clustering-ba   | -none- | -none- | Aerobic cobal   | 0,01396323  | 0,277226996 | 20,15928771 | 3,489485245 | 3,908541339 | 3,405963051 | 0,871415384 |
| <i>R. denitrificans</i> OCh 114 | Respiration     | -none- | -none- | ATP synthase    | 0,006521741 | 0,20750534  | 23,54336848 | 3,496329963 | 16,0218706  | 15,3149564  | 0,955878173 |
| <i>R. denitrificans</i> OCh 114 | Protein Metab   | -none- | -none- | LSU ribosoma    | 0,001178274 | 0,100869685 | 22,95603326 | 3,534121932 | 16,66738751 | 18,21253932 | 1,092705099 |
| <i>R. denitrificans</i> OCh 114 | -none-          | -none- | -none- | SSU ribosoma    | 0,00331387  | 0,155855614 | 23,09440065 | 3,579811622 | 11,26618741 | 12,98510863 | 1,152573463 |
| <i>R. denitrificans</i> OCh 114 | -none-          | -none- | -none- | ABC transpor    | 0,026106905 | 0,425305217 | 24,23529412 | 3,581546308 | 2,140920983 | 2,601594193 | 1,215175251 |
| <i>R. denitrificans</i> OCh 114 | R Metabolism    | -none- | -none- | Ribonuclease    | 0,054898477 | 0,607272043 | 23,9245283  | 3,586334756 | 5,558186452 | 6,418980356 | 1,154869563 |
| <i>R. denitrificans</i> OCh 114 | Respiration     | -none- | -none- | ATP synthase    | 0,013129057 | 0,273572907 | 24,02547771 | 3,623449441 | 3,134641492 | 3,216150978 | 1,02600281  |
| <i>R. denitrificans</i> OCh 114 | Protein Metab   | -none- | -none- | LSU ribosoma    | 0,035322042 | 0,479523479 | 24,02547771 | 3,630168687 | 21,15259105 | 22,44593785 | 1,061143659 |
| <i>R. denitrificans</i> OCh 114 | Protein Metab   | -none- | -none- | LSU ribosoma    | 0,00025463  | 0,076049498 | 22,23167735 | 3,697701844 | 48,87673977 | 43,05561872 | 0,880902019 |
| <i>R. denitrificans</i> OCh 114 | -none-          | -none- | -none- | FIG00987741     | 0,007179314 | 0,20750534  | 22,48471448 | 3,826344394 | 24,79890778 | 18,39049244 | 0,741584775 |
| <i>R. denitrificans</i> OCh 114 | -none-          | -none- | -none- | Spermidine/p    | 0,00267262  | 0,133037104 | 22,05518822 | 3,860078055 | 35,02965566 | 27,30058632 | 0,7793564   |
| <i>R. denitrificans</i> OCh 114 | Protein Metab   | -none- | -none- | Translation el  | 0,002471908 | 0,130284097 | 22,39101677 | 3,89839967  | 37,07287742 | 31,03824382 | 0,837222411 |
| <i>R. denitrificans</i> OCh 114 | Stress Respo    | -none- | -none- | High-affinity c | 0,047489636 | 0,564442943 | 22,95296388 | 4,002213656 | 0,777435428 | 1,067942017 | 1,067942017 |
| <i>R. denitrificans</i> OCh 114 | Protein Metab   | -none- | -none- | LSU ribosoma    | 0,037311553 | 0,491634585 | 23,73006135 | 4,382876619 | 7,323549902 | 7,290579436 | 0,995498021 |
| <i>R. denitrificans</i> OCh 114 | Protein Metab   | -none- | -none- | LSU ribosoma    | 0,045460135 | 0,557976455 | 23,9245283  | 4,542350323 | 3,902423509 | 4,636403685 | 1,188083168 |
| <i>R. denitrificans</i> OCh 114 | Protein Metab   | -none- | -none- | LSU ribosoma    | 0,032751699 | 0,46118649  | 23,09587344 | 4,562754833 | 23,41878551 | 22,90385528 | 0,978012086 |
| <i>R. denitrificans</i> OCh 114 | Protein Metab   | -none- | -none- | Glutamyl-tR(C   | 0,016828912 | 0,292996759 | 23,16584967 | 5,000136237 | 0,467154253 | 0,604828623 | 0,604828623 |
| <i>R. denitrificans</i> OCh 114 | Membrane Tr     | -none- | -none- | Type II/IV sec  | 0,0167957   | 0,292996759 | 23,02440976 | 5,059521454 | 0,610888855 | 0,8427126   | 0,8427126   |
| <i>R. denitrificans</i> OCh 114 | Carbohydrate    | -none- | -none- | Isocitrate deh  | 0,016005479 | 0,292996759 | 23,02440976 | 5,081406872 | 0,478726757 | 0,659630271 | 0,659630271 |

|                                 |                 |        |        |                   |             |             |             |             |             |             |             |
|---------------------------------|-----------------|--------|--------|-------------------|-------------|-------------|-------------|-------------|-------------|-------------|-------------|
| <i>R. denitrificans</i> OCh 114 | Cell Wall and   | -none- | -none- | UDP-N-acetyl      | 0,015470857 | 0,292996759 | 23,02440976 | 5,098022778 | 0,41265448  | 0,568121186 | 0,568121186 |
| <i>R. denitrificans</i> OCh 114 | Cell Division a | -none- | -none- | Carbamoyl-ph      | 0,038755981 | 0,503266066 | 24,80993747 | 22,18056784 | 0,332198731 | 0,400882901 | 0,400882901 |
| <i>R. denitrificans</i> OCh 114 | Fatty Acids, L  | -none- | -none- | 4-hydroxy-3-n     | 0,030897765 | 0,449448555 | 24,80118231 | 22,36563736 | 0,387962907 | 0,543711045 | 0,543711045 |
| <i>R. denitrificans</i> OCh 114 | -none-          | -none- | -none- | Protein expor     | 0,02991954  | 0,449448555 | 24,80118231 | 22,45161267 | 0,726109995 | 1,002712915 | 1,002712915 |
| <i>R. denitrificans</i> OCh 114 | Respiration     | -none- | -none- | DH-ubiquinon      | 0,002317645 | 0,129788128 | 23,92317811 | 22,65880952 | 2,283287026 | 2,313269216 | 1,013131152 |
| <i>R. denitrificans</i> OCh 114 | Amino Acids a   | -none- | -none- | Serine hydrox     | 0,007048596 | 0,20750534  | 24,84642461 | 24,04458532 | 2,388527839 | 3,10920985  | 1,301726444 |
| <i>R. denitrificans</i> OCh 114 | Cofactors, Vit  | -none- | -none- | Chlorophyllide    | 0,00347892  | 0,155855614 | 27,53777778 | 25,10575079 | 2,357401115 | 3,367554632 | 1,428503028 |
| <i>R. denitrificans</i> OCh 114 | Protein Metab   | -none- | -none- | LSU ribosoma      | 0,000748321 | 0,100869685 | 27,08860759 | 25,66393885 | 29,4491659  | 29,93569161 | 1,016520865 |
| <i>R. denitrificans</i> OCh 114 | Cofactors, Vit  | -none- | -none- | Light-indepen     | 0,030392684 | 0,449448555 | 27,1965812  | 26,18453398 | 1,360330953 | 1,833580811 | 1,347893178 |
| <i>R. denitrificans</i> OCh 114 | Carbohydrate    | -none- | -none- | Glycolate deh     | 0,010355936 | 0,251676499 | 27,03563941 | 26,19068445 | 1,550145416 | 1,82195885  | 1,175347056 |
| <i>R. denitrificans</i> OCh 114 | -none-          | -none- | -none- | FIG00461010       | 0,000825465 | 0,100869685 | 26,95235455 | 26,2297722  | 3,052268514 | 2,751561013 | 0,901480653 |
| <i>R. denitrificans</i> OCh 114 | Cofactors, Vit  | -none- | -none- | Light-indepen     | 0,000933744 | 0,100869685 | 27,1965812  | 27,05349448 | 2,95141782  | 3,771140227 | 1,277738517 |
| <i>R. denitrificans</i> OCh 114 | Respiration     | -none- | -none- | Cytochrome c      | 0,000786529 | 0,100869685 | 27,4790287  | 27,26369602 | 5,307969024 | 5,873332391 | 1,106512183 |
| <i>A. vinosum</i> DSM180        | Fatty Acids, L  | -none- | -none- | 1-hydroxy-2-n     | 0,002115629 | 0,426312881 | 26,05117996 | 0,414655844 | 2,232139531 | 2,277628959 | 1,020379294 |
| <i>A. vinosum</i> DSM180        | -none-          | -none- | -none- | Dissimilatory     | 0,04160152  | 1           | 24,12604727 | 0,458772732 | 23,57988712 | 16,14957733 | 0,684887813 |
| <i>A. vinosum</i> DSM180        | Amino Acids a   | -none- | -none- | 3-isopropylma     | 0,035451697 | 1           | 23,2300891  | 0,884792699 | 1,184197941 | 1,305694509 | 1,102598193 |
| <i>A. vinosum</i> DSM180        | R Metabolism    | -none- | -none- | ATP-depende       | 0,030390919 | 1           | 22,09656315 | 0,895207926 | 0,545004224 | 0,785246752 | 0,785246752 |
| <i>A. vinosum</i> DSM180        | -none-          | -none- | -none- | Gsr1677 prote     | 0,000421059 | 0,250487366 | 24,12604727 | 1,008876619 | 5,874590497 | 5,974206055 | 1,016957022 |
| <i>A. vinosum</i> DSM180        | Respiration     | -none- | -none- | Adenylylsulfat    | 0,00367722  | 0,575626346 | 25,4155811  | 1,201523572 | 2,406824319 | 2,124432969 | 0,88267056  |
| <i>A. vinosum</i> DSM180        | -none-          | -none- | -none- | RNP-1 like R-     | 0,026846552 | 1           | 20,93934794 | 1,742899289 | 0,851029601 | 0,936299663 | 0,936299663 |
| <i>A. vinosum</i> DSM180        | Sulfur Metabo   | -none- | -none- | tR 2-thiouridir   | 0,013571741 | 1           | 22,95583284 | 1,857106183 | 41,40845683 | 30,22820344 | 0,730000723 |
| <i>A. vinosum</i> DSM180        | Amino Acids a   | -none- | -none- | Tryptophan sy     | 0,001850945 | 0,418519274 | 24,86772336 | 2,119278146 | 0,671828889 | 0,781460393 | 0,781460393 |
| <i>A. vinosum</i> DSM180        | -none-          | -none- | -none- | Prolipoprotein    | 0,0014356   | 0,374398364 | 24,83182606 | 2,232959337 | 0,531469418 | 0,601960505 | 0,601960505 |
| <i>A. vinosum</i> DSM180        | Cell Division a | -none- | -none- | Cell division p   | 0,001471836 | 0,374398364 | 21,57076781 | 2,717267453 | 4,585300425 | 4,376486091 | 0,954460054 |
| <i>A. vinosum</i> DSM180        | -none-          | -none- | -none- | GTP-binding p     | 0,027560896 | 1           | 21,33333333 | 2,983675254 | 0,893340727 | 0,86650423  | 0,86650423  |
| <i>A. vinosum</i> DSM180        | -none-          | -none- | -none- | Putative sulfa    | 0,016292467 | 1           | 23,88244797 | 3,073941866 | 13,59989637 | 14,58184169 | 1,072202412 |
| <i>A. vinosum</i> DSM180        | Nitrogen Meta   | -none- | -none- | Nitrogen regu     | 0,004979347 | 0,723783663 | 24,34437086 | 3,159447426 | 56,90431127 | 41,56076293 | 0,730362287 |
| <i>A. vinosum</i> DSM180        | -none-          | -none- | -none- | Iron(III) dicitra | 0,026979722 | 1           | 23,73006135 | 3,172323512 | 5,756997989 | 4,215788547 | 0,73228939  |
| <i>A. vinosum</i> DSM180        | Cofactors, Vit  | -none- | -none- | Chlorophyllide    | 0,000204245 | 0,250487366 | 23,23880289 | 3,239764566 | 2,556943168 | 2,997644149 | 1,172354625 |
| <i>A. vinosum</i> DSM180        | Carbohydrate    | -none- | -none- | Pyruvate kise     | 0,031027856 | 1           | 22,39672802 | 3,277695563 | 6,455414411 | 4,710544823 | 0,729704481 |
| <i>A. vinosum</i> DSM180        | Cell Wall and   | -none- | -none- | Phosphogluc       | 0,000295111 | 0,250487366 | 21,07068338 | 3,33646132  | 5,745474551 | 4,148856457 | 0,722108578 |
| <i>A. vinosum</i> DSM180        | Respiration     | -none- | -none- | Adenylylsulfat    | 0,01612873  | 1           | 20,98979747 | 3,338202674 | 5,682160287 | 5,199368737 | 0,915033803 |
| <i>A. vinosum</i> DSM180        | R Metabolism    | -none- | -none- | R polymerase      | 0,007147929 | 0,909127196 | 23,24489679 | 3,409959297 | 4,878315185 | 4,217476336 | 0,864535434 |
| <i>A. vinosum</i> DSM180        | Motility and C  | -none- | -none- | R polymerase      | 0,009440262 | 1           | 23,42321703 | 3,637736479 | 15,02080081 | 13,32718414 | 0,887248576 |
| <i>A. vinosum</i> DSM180        | Respiration     | -none- | -none- | Succite dehyd     | 0,011098184 | 1           | 23,44038757 | 3,640053557 | 1,660943159 | 1,96865888  | 1,185265654 |
| <i>A. vinosum</i> DSM180        | Carbohydrate    | -none- | -none- | Transketolase     | 0,019784879 | 1           | 23,12994006 | 3,8061418   | 4,757599912 | 5,106963892 | 1,07343282  |
| <i>A. vinosum</i> DSM180        | Nitrogen Meta   | -none- | -none- | Nitrogese (mc     | 0,026359893 | 1           | 22,519177   | 3,859709107 | 33,11490036 | 30,84882942 | 0,931569447 |
| <i>A. vinosum</i> DSM180        | Nucleosides a   | -none- | -none- | Phosphoribos      | 0,001225231 | 0,374398364 | 23,16584967 | 3,956097427 | 0,524981235 | 0,627613126 | 0,627613126 |
| <i>A. vinosum</i> DSM180        | Cofactors, Vit  | -none- | -none- | Pyridoxine 5'     | 0,051849692 | 1           | 23,4556213  | 4,293533139 | 2,750740492 | 2,345802737 | 0,852789547 |

|                          |                |        |        |                 |             |             |             |             |             |             |             |
|--------------------------|----------------|--------|--------|-----------------|-------------|-------------|-------------|-------------|-------------|-------------|-------------|
| <i>A. vinosum</i> DSM180 | -none-         | -none- | -none- | UTP--glucose    | 0,023001804 | 1           | 24,02547771 | 4,568558197 | 0,625274564 | 0,616214056 | 0,616214056 |
| <i>A. vinosum</i> DSM180 | -none-         | -none- | -none- | glutamine cyc   | 0,047517824 | 1           | 23,54491018 | 4,853525925 | 4,721469897 | 4,265804854 | 0,903490851 |
| <i>A. vinosum</i> DSM180 | -none-         | -none- | -none- | R methyltrans   | 0,044296305 | 1           | 23,02440976 | 4,984877998 | 0,198287472 | 0,274821114 | 0,274821114 |
| <i>A. vinosum</i> DSM180 | -none-         | -none- | -none- | SrpA-related p  | 0,049570178 | 1           | 24,02547771 | 5,041646697 | 13,19212074 | 17,77791813 | 1,34761639  |
| <i>A. vinosum</i> DSM180 | -none-         | -none- | -none- | DH-ubiquinon    | 0,016005479 | 1           | 23,02440976 | 5,081406872 | 0,478726757 | 0,659630271 | 0,659630271 |
| <i>A. vinosum</i> DSM180 | Respiration    | -none- | -none- | Ubiquinol--cyl  | 0,011892284 | 1           | 22,84957098 | 5,290290886 | 0,362019234 | 0,492153509 | 0,492153509 |
| <i>A. vinosum</i> DSM180 | Nitrogen Meta  | -none- | -none- | Nitrogese (mc   | 0,030502171 | 1           | 23,47359654 | 5,774475532 | 10,20369549 | 9,143555245 | 0,896102325 |
| <i>A. vinosum</i> DSM180 | -none-         | -none- | -none- | CRISPR-assc     | 0,049255653 | 1           | 23,52833783 | 5,933158462 | 1,456552979 | 1,911701411 | 1,312483266 |
| <i>A. vinosum</i> DSM180 | Protein Metab  | -none- | -none- | TldD family pr  | 0,016772283 | 1           | 26,44748858 | 24,46804311 | 1,152280497 | 1,100492441 | 0,955056034 |
| <i>A. vinosum</i> DSM180 | -none-         | -none- | -none- | FIG023769: C    | 0,002304394 | 0,426312881 | 26,7804878  | 24,72185547 | 3,44166062  | 3,880290047 | 1,127447031 |
| <i>A. vinosum</i> DSM180 | Carbohydrate   | -none- | -none- | Phosphoenolp    | 0,019965179 | 1           | 25,0647482  | 25,01429123 | 0,262153347 | 0,356623365 | 0,356623365 |
| <i>A. vinosum</i> DSM180 | -none-         | -none- | -none- | transposase     | 0,019965179 | 1           | 25,0647482  | 25,01429123 | 1,048613389 | 1,42649346  | 1,36036167  |
| <i>A. vinosum</i> DSM180 | -none-         | -none- | -none- | TldD protein,   | 0,006222486 | 0,844183934 | 27,2516129  | 25,74053988 | 0,828015204 | 1,053237867 | 1,053237867 |
| <i>A. vinosum</i> DSM180 | Amino Acids a  | -none- | -none- | Sulfate transp  | 0,000492358 | 0,250487366 | 25,75777304 | 25,74274179 | 0,701379357 | 0,692792476 | 0,692792476 |
| <i>A. vinosum</i> DSM180 | -none-         | -none- | -none- | Cytochrome c    | 0,019821674 | 1           | 26,93167702 | 26,14975015 | 1,136409812 | 1,265154225 | 1,11329048  |
| <i>A. vinosum</i> DSM180 | Miscellaneous  | -none- | -none- | Serine acetyl   | 0,036810589 | 1           | 26,93167702 | 26,24766546 | 1,725942393 | 1,539810315 | 0,892156263 |
| <i>A. vinosum</i> DSM180 | Cofactors, Vit | -none- | -none- | Chlorophyll a   | 0,003350727 | 0,568227468 | 26,83026585 | 26,77456694 | 7,022073686 | 8,861271592 | 1,261916634 |
| <i>A. vinosum</i> DSM180 | -none-         | -none- | -none- | FIG152265: S    | 0,001420362 | 0,374398364 | 27,42105263 | 27,17331602 | 0,588790998 | 0,554576611 | 0,554576611 |
| <i>C. litoralis</i> KT71 | R Metabolism   | -none- | -none- | Ribonuclease    | 0,00714993  | 0,371721061 | 27,00599749 | 0,127271593 | 0,811118203 | 0,930172464 | 0,930172464 |
| <i>C. litoralis</i> KT71 | Stress Respo   | -none- | -none- | HflK protein    | 0,00048031  | 0,15977032  | 26,39808153 | 0,19894617  | 2,514299113 | 3,070238499 | 1,221111078 |
| <i>C. litoralis</i> KT71 | -none-         | -none- | -none- | LSU ribosoma    | 0,005165764 | 0,371721061 | 26,09695453 | 0,589455923 | 46,78805607 | 39,28298289 | 0,839594251 |
| <i>C. litoralis</i> KT71 | Protein Metab  | -none- | -none- | SSU ribosoma    | 0,021767471 | 0,565083536 | 26,53041363 | 0,616422854 | 7,201142587 | 6,107843717 | 0,848177028 |
| <i>C. litoralis</i> KT71 | Carbohydrate   | -none- | -none- | Succite dehyd   | 0,008034117 | 0,371721061 | 27,14225053 | 0,717293546 | 1,877451121 | 1,868526456 | 0,995246393 |
| <i>C. litoralis</i> KT71 | Protein Metab  | -none- | -none- | LSU ribosoma    | 0,020438439 | 0,552689452 | 23,35162274 | 0,832826027 | 3,258012951 | 2,999558369 | 0,920671101 |
| <i>C. litoralis</i> KT71 | Stress Respo   | -none- | -none- | Superoxide di   | 0,001766511 | 0,265270112 | 20,44519896 | 1,369531338 | 1,998872745 | 1,27245524  | 0,636586417 |
| <i>C. litoralis</i> KT71 | -none-         | -none- | -none- | Acyl-CoA deh    | 0,004327797 | 0,371721061 | 20,26388889 | 1,763862581 | 0,82952599  | 0,74463266  | 0,74463266  |
| <i>C. litoralis</i> KT71 | Protein Metab  | -none- | -none- | LSU ribosoma    | 0,002478207 | 0,268059346 | 23,96402116 | 2,657372546 | 22,51647412 | 21,75230842 | 0,966061928 |
| <i>C. litoralis</i> KT71 | Fatty Acids, L | -none- | -none- | Acyl carrier pr | 0,020436367 | 0,552689452 | 22,03508772 | 2,981544081 | 24,99888035 | 25,17743856 | 1,007142649 |
| <i>C. litoralis</i> KT71 | Photosynthes   | -none- | -none- | Light-harvesti  | 0,007497029 | 0,371721061 | 21,59470374 | 3,010054993 | 158,1068142 | 167,6397141 | 1,060294048 |
| <i>C. litoralis</i> KT71 | Photosynthes   | -none- | -none- | Light-harvesti  | 0,007011052 | 0,371721061 | 22,76697661 | 3,290472769 | 672,0277097 | 549,976817  | 0,818384137 |
| <i>C. litoralis</i> KT71 | Nitrogen Meta  | -none- | -none- | Ammonium tr     | 0,025430039 | 0,634772889 | 24,12903226 | 3,314146652 | 0,911491729 | 1,1632981   | 1,1632981   |
| <i>C. litoralis</i> KT71 | Protein Metab  | -none- | -none- | SSU ribosoma    | 0,053653014 | 0,999985161 | 23,82608696 | 3,444086312 | 11,44994045 | 12,84640089 | 1,121962245 |
| <i>C. litoralis</i> KT71 | Protein Metab  | -none- | -none- | Translation el  | 0,005965415 | 0,371721061 | 20,98979747 | 3,470206943 | 1,932527109 | 1,540976639 | 0,797389404 |
| <i>C. litoralis</i> KT71 | -none-         | -none- | -none- | Cold shock pr   | 0,0057624   | 0,371721061 | 21,08349519 | 3,497216032 | 234,7339082 | 257,8094618 | 1,098305157 |
| <i>C. litoralis</i> KT71 | Protein Metab  | -none- | -none- | SSU ribosoma    | 0,002043683 | 0,265270112 | 23,27492642 | 3,521518033 | 9,933522533 | 9,796968525 | 0,986253214 |
| <i>C. litoralis</i> KT71 | Photosynthes   | -none- | -none- | Light-harvesti  | 0,015052132 | 0,514149134 | 23,57493734 | 3,539817282 | 42,38574968 | 49,16629415 | 1,159972267 |
| <i>C. litoralis</i> KT71 | Regulation an  | -none- | -none- | S-adenosylme    | 0,00176879  | 0,265270112 | 22,9181479  | 3,603177822 | 1,831145231 | 1,924497102 | 1,050980048 |
| <i>C. litoralis</i> KT71 | Respiration    | -none- | -none- | ATP synthase    | 0,008591396 | 0,371721061 | 24,02547771 | 3,642342565 | 7,290751648 | 7,958729291 | 1,09161986  |
| <i>C. litoralis</i> KT71 | -none-         | -none- | -none- | Predicted tran  | 0,010078895 | 0,402977216 | 22,81579943 | 3,647031804 | 15,26283807 | 14,70343094 | 0,96334842  |

|                          |                |                    |                   |                 |              |              |               |               |                |               |              |
|--------------------------|----------------|--------------------|-------------------|-----------------|--------------|--------------|---------------|---------------|----------------|---------------|--------------|
| <i>C. litoralis</i> KT71 | Stress Respo   | -none-             | -none-            | R polymerase    | 0,010555644  | 0,402977216  | 23,28315412   | 3,754364288   | 1,148789418    | 1,361592944   | 1,185241545  |
| <i>C. litoralis</i> KT71 | -none-         | -none-             | -none-            | hypothetical p  | 0,011689393  | 0,421467552  | 23,0236782    | 3,761791765   | 14,40424766    | 10,37872195   | 0,72053204   |
| <i>C. litoralis</i> KT71 | Photosynthes   | -none-             | -none-            | Light-harvesti  | 0,05455285   | 0,999985161  | 23,49849272   | 3,777661991   | 81,31438815    | 95,48755532   | 1,174300852  |
| <i>C. litoralis</i> KT71 | Respiration    | -none-             | -none-            | ATP synthase    | 0,054998598  | 0,999985161  | 21,38031061   | 3,868580984   | 2,474999844    | 3,192462517   | 1,289883927  |
| <i>C. litoralis</i> KT71 | Protein Metab  | -none-             | -none-            | SSU ribosoma    | 0,050918809  | 0,999985161  | 24,02547771   | 4,896124722   | 19,97940473    | 25,02726018   | 1,252652945  |
| <i>C. litoralis</i> KT71 | Protein Metab  | -none-             | -none-            | SSU ribosoma    | 0,017205423  | 0,552689452  | 22,88368539   | 4,911617318   | 118,8445503    | 113,2178587   | 0,952655031  |
| <i>C. litoralis</i> KT71 | -none-         | -none-             | -none-            | Mobile eleme    | 0,019789992  | 0,552689452  | 22,92206129   | 5,107127868   | 0,491097194    | 0,680733764   | 0,680733764  |
| <i>C. litoralis</i> KT71 | Protein Metab  | -none-             | -none-            | LSU ribosoma    | 0,050610828  | 0,999985161  | 24,02547771   | 5,284358332   | 8,485326363    | 10,37684346   | 1,222916246  |
| <i>C. litoralis</i> KT71 | -none-         | -none-             | -none-            | Glutamate 5-l   | 0,043411992  | 0,971530431  | 24,12903226   | 19,41344666   | 0,447488388    | 0,490578206   | 0,490578206  |
| <i>C. litoralis</i> KT71 | -none-         | -none-             | -none-            | Mobile eleme    | 0,041031472  | 0,951050904  | 23,38493523   | 20,71804389   | 3,249320527    | 4,617516713   | 1,421071474  |
| <i>C. litoralis</i> KT71 | -none-         | -none-             | -none-            | ThiJ/Pfpl fam   | 0,049674798  | 0,999985161  | 27,1965812    | 24,04720966   | 2,939811754    | 3,191482301   | 1,085607708  |
| <i>C. litoralis</i> KT71 | Nucleosides a  | -none-             | -none-            | Ribonucleotid   | 0,019965179  | 0,552689452  | 25,0647482    | 25,01429123   | 0,524306694    | 0,71324673    | 0,71324673   |
| <i>C. litoralis</i> KT71 | Clustering-ba  | -none-             | -none-            | Cell division t | 0,000492358  | 0,15977032   | 25,75777304   | 25,74274179   | 0,701379357    | 0,692792476   | 0,692792476  |
| <i>C. litoralis</i> KT71 | Photosynthes   | -none-             | -none-            | Photosynthesi   | 0,028123541  | 0,676006603  | 27,1965812    | 27,18618898   | 3,771124672    | 5,164199566   | 1,369405685  |
| Eu                       | Miscellaneous  | Plant-Prokaryote   | At5g38900         | Putative sodiu  | 0,0009753383 | 0,2837628171 | 23,0944006469 | 21,1382231750 | 1,5953732638   | 1,9332951833  | 1,2118137036 |
| Eu                       | RNA Metaboli   | Transcription      | RNA_polymeras     | DNA-directed    | 0,0011238608 | 0,2837628171 | 27,1965811966 | 24,8483118221 | 3,0298926279   | 3,8616127051  | 1,2745048024 |
| Eu                       | Protein Metab  | Protein biosynthe  | Ribosome_S        | SSU ribosoma    | 0,0016924036 | 0,2837628171 | 27,5973154362 | 24,9197550280 | 4,4903010539   | 5,5610123911  | 1,2384497886 |
| Eu                       | RNA Metaboli   | RNA processing a   | tRNA_modificati   | Protein RtcB    | 0,0017134094 | 0,2837628171 | 24,2502612330 | 11,8867861936 | 1,3401658265   | 1,4658632645  | 1,0937924513 |
| Eu                       | Protein Metab  | Protein biosynthe  | Ribosome_S        | SSU ribosoma    | 0,0025063851 | 0,2837628171 | 27,1422505308 | 26,0227996541 | 4,1617585414   | 3,9312302998  | 0,9446079730 |
| Eu                       | Protein Metab  | Protein biosynthe  | Ribosome_S        | SSU ribosoma    | 0,0025641218 | 0,2837628171 | 22,7706257236 | 21,2376897169 | 14,5556450677  | 8,7180894026  | 0,5989490237 |
| Eu                       | Protein Metab  | Protein degradati  | Proteasome_eu     | proteasome s    | 0,0063491658 | 0,6022637258 | 27,3638344227 | 25,8427531812 | 1,2454149611   | 1,7147239073  | 1,3768293788 |
| Eu                       | Photosynthes   | Electron transport | Photosystem_II    | Photosystem     | 0,0084839620 | 0,6856524833 | 27,2516129032 | 27,0713187240 | 198,6301158476 | 52,4001853041 | 0,2638078575 |
| Eu                       | RNA Metaboli   | RNA processing a   | tRNA_modificati   | Iron-sulfur clu | 0,0098455102 | 0,6856524833 | 24,5928652244 | 23,5251837902 | 7,1603446605   | 5,7689304234  | 0,8056777567 |
| Eu                       | Miscellaneous  | NULL               | ZZ_gjo_need_h     | RNase L inhibi  | 0,0111491928 | 0,6856524833 | 26,3854875283 | 25,7870077301 | 2,6668761827   | 3,2283194607  | 1,2105246886 |
| Eu                       | Respiration    | ATP synthases      | V-Type_ATP_sy     | V-type ATP sy   | 0,0119017889 | 0,6856524833 | 26,6666666667 | 25,4374169293 | 0,8018626064   | 1,1233445432  | 1,1233445432 |
| Eu                       | Regulation an  | Proteolytic pathwa | Regulatory_Intra  | Endoplasmic     | 0,0125343422 | 0,6856524833 | 20,0879864636 | 2,6983004935  | 19,4274970051  | 8,9195714367  | 0,4591209786 |
| Eu                       | Photosynthes   | Electron transport | Photosystem_II    | Photosystem     | 0,0134239191 | 0,6856524833 | 27,1422505308 | 26,3413405270 | 25,0575515995  | 11,8910629814 | 0,4745500746 |
| Eu                       | RNA Metaboli   | Transcription      | RNA_polymeras     | DNA-directed    | 0,0199651793 | 0,9200295494 | 25,0647482014 | 12,6733095322 | 1,1215388450   | 1,1532841076  | 1,0283050942 |
| Eu                       | Cofactors, Vit | Tetrapyrroles      | Chlorophyll_Bio   | Light-indepen   | 0,0215473079 | 0,9200295494 | 20,8428266890 | 13,2129417849 | 3,3033181345   | 2,1515783676  | 0,6513385269 |
| Eu                       | Protein Metab  | Protein biosynthe  | Ribosome_LSU      | LSU ribosoma    | 0,0226859732 | 0,9200295494 | 24,9853831221 | 22,7092542904 | 2,4594497623   | 2,5786682408  | 1,0484736384 |
| Eu                       | Protein Metab  | Protein biosynthe  | Translation_initi | Eukaryotic tra  | 0,0240364420 | 0,9200295494 | 27,1965811966 | 26,1502878183 | 4,2816174656   | 4,9888123810  | 1,1651700370 |
| Eu                       | Cell Wall and  | Cell wall of Mycot | mycolic_acid_sy   | acyl-CoA synt   | 0,0251451360 | 0,9200295494 | 21,3424962535 | 1,1451772479  | 1,0388861342   | 1,1570979726  | 1,1137870980 |
| Eu                       | Protein Metab  | Protein biosynthe  | Ribosome_LSU      | LSU ribosoma    | 0,0282528588 | 0,9200295494 | 26,7313131313 | 24,6240324697 | 10,6803544382  | 6,9278617184  | 0,6486546639 |
| Eu                       | Clustering-ba  | NULL               | CBSS-316057.3     | Cytochrome c    | 0,0286439579 | 0,9200295494 | 27,0356394130 | 26,1193815097 | 72,8918169178  | 39,4970563768 | 0,5418585796 |
| Eu                       | Protein Metab  | Protein biosynthe  | Ribosome_LSU      | LSU ribosoma    | 0,0332655648 | 0,9200295494 | 26,6666666667 | 24,4096946401 | 3,1593916473   | 2,6282109313  | 0,8318724694 |
| Eu                       | Carbohydrate   | Central carbohyd   | TCA_Cycle         | Succinyl-CoA    | 0,0334972117 | 0,9200295494 | 27,3638344227 | 25,7836552105 | 3,0670806761   | 3,2229463191  | 1,0508188924 |
| Eu                       | Carbohydrate   | Central carbohyd   | Entner-Doudoro    | Glucose-6-ph    | 0,0350472661 | 0,9200295494 | 25,6500000000 | 23,9794251504 | 0,9184371937   | 0,9670853967  | 0,9670853967 |
| Eu                       | Protein Metab  | Protein degradati  | Proteasome_eu     | proteasome r    | 0,0373733673 | 0,9200295494 | 24,2037814038 | 22,2909088876 | 2,9948970431   | 3,5716725607  | 1,1925860921 |
| Eu                       | Photosynthes   | Electron transport | Photosystem_II    | Cytochrome b    | 0,0387321048 | 0,9200295494 | 27,4210526316 | 0,6124416835  | 84,6353988757  | 35,2630457767 | 0,4166465361 |
| Eu                       | Respiration    | Electron donating  | Respiratory_Co    | NADH-ubiquin    | 0,0408142475 | 0,9200295494 | 25,0647482014 | 0,9174701919  | 6,4328785400   | 2,8162985013  | 0,4377975558 |
| Eu                       | Cofactors, Vit | Tetrapyrroles      | Chlorophyll_Bio   | Light-indepen   | 0,0418574291 | 0,9200295494 | 21,4046345811 | 12,7908726442 | 1,5430799217   | 1,9358416532  | 1,2545310363 |
| Eu                       | Respiration    | Electron donating  | Respiratory_Co    | NADH-ubiquin    | 0,0423391606 | 0,9200295494 | 27,0059974894 | 0,1972570288  | 3,4839021410   | 2,5822362377  | 0,7411908065 |
| Eu                       | Protein Metab  | Protein biosynthe  | Ribosome_LSU      | LSU ribosoma    | 0,0438260453 | 0,9200295494 | 25,1970802920 | 24,8819410660 | 2,5749903455   | 1,3654969861  | 0,5302920799 |
| Eu                       | Photosynthes   | Electron transport | Photosystem_II    | Photosystem     | 0,0442963047 | 0,9200295494 | 23,0244097639 | 4,9848779975  | 0,6609582385   | 0,9160703786  | 0,9160703786 |
| Eu                       | Phages, Prop   | Pathogenicity isla | Staphylococcal    | Heat shock pr   | 0,0458419717 | 0,9200295494 | 26,5304136253 | 25,6497407818 | 5,6016398184   | 4,7314492326  | 0,8446543130 |
| Eu                       | Protein Metab  | Protein biosynthe  | tRNA_aminocac     | Valyl-tRNA sy   | 0,0468529640 | 0,9200295494 | 27,6576576577 | 27,3111544105 | 1,2671511227   | 1,5542356296  | 1,2265590124 |



|    |               |                   |                 |               |              |              |               |               |                |               |              |
|----|---------------|-------------------|-----------------|---------------|--------------|--------------|---------------|---------------|----------------|---------------|--------------|
| Eu | Miscellaneous | NULL              | YbbK            | Putative stom | 0,0471099468 | 0,9200295494 | 22,7956989247 | 22,6751164882 | 0,4600012311   | 0,6340652913  | 0,6340652913 |
| Eu | Protein Metab | Selenoproteins    | Selenocysteine  | Selenide,wate | 0,0471099468 | 0,9200295494 | 22,7956989247 | 22,6751164882 | 0,4600012311   | 0,6340652913  | 0,6340652913 |
| Eu | Protein Metab | Protein biosynthe | Ribosome_SSU    | SSU ribosom   | 0,0492786283 | 0,9348859765 | 26,8806584362 | 26,1072372893 | 9,8425058639   | 7,3523630311  | 0,7470011329 |
| Eu | Respiration   | Electron acceptin | Terminal_cytoct | Cytochrome c  | 0,0519549125 | 0,9582794975 | 27,0356394130 | 0,7208624633  | 138,3956465459 | 93,4595677644 | 0,6753071364 |

Table S4. MetaCycle output of *kaiABC*, *cikA*, *nifH*, *psbA* and *prx*. The relative expressions of these genes in *L. aestuarii* PCC8106 (CCY9616) and their summed MG-RAST abundances served as input values.

| CyclID                                     | meta2d_pvalue | meta2d_BH.Q | meta2d_period | meta2d_phase | meta2d_Base | meta2d_AMP  | meta2d_rAMP |
|--------------------------------------------|---------------|-------------|---------------|--------------|-------------|-------------|-------------|
| psbA (MG-RAST)                             | 0,180244571   | 0,270366856 | 23,2          | 15,47569887  | 1510,564323 | 426,803797  | 0,282545927 |
| psbA (relative concentration L. aestuarii) | 0,10966057    | 0,219321139 | 27,1965812    | 12,96012543  | 32,96679758 | 11,65877817 | 0,35365213  |
| nifH (relative concentration L. aestuarii) | 0,036552665   | 0,109657995 | 24,34437086   | 3,57358401   | 156,6440172 | 93,19572398 | 0,594952336 |
| nifH (MG-RAST)                             | 0,002714932   | 0,016289591 | 26,06515707   | 12,21853137  | 148,5559266 | 93,18037692 | 0,62724106  |
| prx (relative concentration L. aestuarii)  | 0,228783107   | 0,274539728 | 22,88368539   | 6,030676435  | 0,091391751 | 0,043437302 | 0,043437302 |
| prx (MG-RAST)                              | 0,320442903   | 0,320442903 | 27,2516129    | 2,907006377  | 50,43348929 | 30,51627533 | 0,605079596 |
| kaiA (MG-RAST)                             | 0,72056521    | 0,823503097 | 22            | 12,1         | 0,412909636 | 0,637202308 | 0,637202308 |
| kaiC (MG-RAST)                             | 0,918803554   | 0,918803554 | 24,93064877   | 20,24537597  | 7,457988802 | 2,093003224 | 0,280639094 |
| kaiB (MG-RAST)                             | 0,089231423   | 0,237950461 | 23,54491018   | 19,55729774  | 3,955562071 | 2,761268294 | 0,698072295 |
| cikA (MG-RAST)                             | 0,173640628   | 0,347281256 | 23,9245283    | 19,94568515  | 5,452461622 | 3,652637782 | 0,669906188 |
| kaiA (L. aestuarii rel. conc)              | 0,031440574   | 0,125762295 | 22,56691919   | 6,605202938  | 0,137788744 | 0,058890114 | 0,058890114 |
| kaiB (L. aestuarii rel. conc)              | 0,35803796    | 0,477383947 | 22,3030303    | 4,830223848  | 0,177240653 | 0,083539054 | 0,083539054 |
| kaiC (L. aestuarii rel. conc)              | 0,232250167   | 0,371600267 | 23,36842105   | 6,90138829   | 0,138986104 | 0,078997642 | 0,078997642 |
| cikA (L. aestuarii rel. conc)              | 0,015072518   | 0,120580146 | 27,14225053   | 0,003522762  | 0,060926769 | 0,032827762 | 0,032827762 |

Table S5. Phylogenetic distribution of *kaiABC*, *cikA*, *nifH*, *psbA* and *prx* genes determined by MG-RAST.

| gene        | domain   | phylum       | className         | order         | family       | genus             | MG-RAST abundance |
|-------------|----------|--------------|-------------------|---------------|--------------|-------------------|-------------------|
| <i>kaiA</i> | Bacteria | Cyanobacteri | unclassified (de  | Chroococca    | unclassified | Cyanothece        | 2                 |
| <i>kaiB</i> | Archaea  | Euryarchaeo  | Methanomicrob     | Methanosar    | Methanosar   | Methanosarcina    | 1                 |
| <i>kaiB</i> | Bacteria | Bacteroidete | Flavobacteria     | Flavobacter   | Flavobacter  | Flavobacterium    | 1                 |
| <i>kaiB</i> | Bacteria | Cyanobacteri | unclassified (de  | Chroococca    | unclassified | Cyanothece        | 9                 |
| <i>kaiB</i> | Bacteria | Cyanobacteri | unclassified (de  | Chroococca    | unclassified | Synechococcus     | 2                 |
| <i>kaiB</i> | Bacteria | Cyanobacteri | unclassified (de  | Nostocales    | Nostocacea   | Nostoc            | 7                 |
| <i>kaiB</i> | Bacteria | Cyanobacteri | unclassified (de  | Oscillatoria  | unclassified | Trichodesmium     | 6                 |
| <i>kaiC</i> | Archaea  | Euryarchaeo  | Methanomicrob     | Methanomicro  | unclassified | Methanoregula     | 1                 |
| <i>kaiC</i> | Bacteria | Chloroflexi  | Chloroflexi (clas | Chloroflexal  | Chloroflexal | Roseiflexus       | 6                 |
| <i>kaiC</i> | Bacteria | Cyanobacteri | unclassified (de  | Chroococca    | unclassified | Crocospaera       | 5                 |
| <i>kaiC</i> | Bacteria | Cyanobacteri | unclassified (de  | Chroococca    | unclassified | Cyanothece        | 16                |
| <i>kaiC</i> | Bacteria | Cyanobacteri | unclassified (de  | Chroococca    | unclassified | Synechococcus     | 7                 |
| <i>kaiC</i> | Bacteria | Cyanobacteri | unclassified (de  | Nostocales    | Nostocacea   | Anabaena          | 2                 |
| <i>kaiC</i> | Bacteria | Cyanobacteri | unclassified (de  | Nostocales    | Nostocacea   | Nostoc            | 1                 |
| <i>kaiC</i> | Bacteria | Cyanobacteri | unclassified (de  | Oscillatoria  | unclassified | Trichodesmium     | 11                |
| <i>kaiC</i> | Bacteria | Proteobacte  | Deltaproteobact   | Myxococcal    | Haliangiace  | Haliangium        | 1                 |
| <i>nifH</i> | Bacteria | Actinobacter | Actinobacteria (  | Actinomycet   | Frankiaceae  | Frankia           | 1                 |
| <i>nifH</i> | Bacteria | Chlorobi     | Chlorobia         | Chlorobiales  | Chlorobiace  | Chlorobaculum     | 38                |
| <i>nifH</i> | Bacteria | Chlorobi     | Chlorobia         | Chlorobiales  | Chlorobiace  | Chloroherpeton    | 6                 |
| <i>nifH</i> | Bacteria | Chlorobi     | Chlorobia         | Chlorobiales  | Chlorobiace  | Pelodictyon       | 16                |
| <i>nifH</i> | Bacteria | Chloroflexi  | Dehalococcoide    | unclassified  | unclassified | Dehalococcoides   | 2                 |
| <i>nifH</i> | Bacteria | Cyanobacteri | unclassified (de  | Chroococca    | unclassified | Crocospaera       | 30                |
| <i>nifH</i> | Bacteria | Cyanobacteri | unclassified (de  | Chroococca    | unclassified | Cyanothece        | 792               |
| <i>nifH</i> | Bacteria | Cyanobacteri | unclassified (de  | Chroococca    | unclassified | Synechococcus     | 17                |
| <i>nifH</i> | Bacteria | Cyanobacteri | unclassified (de  | Nostocales    | Nostocacea   | Anabaena          | 52                |
| <i>nifH</i> | Bacteria | Cyanobacteri | unclassified (de  | Nostocales    | Nostocacea   | Nostoc            | 1                 |
| <i>nifH</i> | Bacteria | Cyanobacteri | unclassified (de  | Oscillatoria  | unclassified | Trichodesmium     | 470               |
| <i>nifH</i> | Bacteria | Deferribacte | Deferribacteres   | Deferribacte  | Deferribacte | Denitrovibrio     | 1                 |
| <i>nifH</i> | Bacteria | Firmicutes   | Clostridia        | Clostridiales | Clostridiace | Clostridium       | 17                |
| <i>nifH</i> | Bacteria | Firmicutes   | Clostridia        | Clostridiales | Heliobacteri | Heliobacterium    | 2                 |
| <i>nifH</i> | Bacteria | Firmicutes   | Clostridia        | Clostridiales | Peptococca   | Desulfotomaculum  | 1                 |
| <i>nifH</i> | Bacteria | Proteobacte  | Alphaproteobac    | Rhizobiales   | Bradyrhizob  | Bradyrhizobium    | 20                |
| <i>nifH</i> | Bacteria | Proteobacte  | Alphaproteobac    | Rhodospirill  | Rhodospirill | Rhodospirillum    | 30                |
| <i>nifH</i> | Bacteria | Proteobacte  | Betaproteobacte   | Rhodocyclus   | Rhodocyclus  | Azoarcus          | 3                 |
| <i>nifH</i> | Bacteria | Proteobacte  | Betaproteobacte   | Rhodocyclus   | Rhodocyclus  | Dechloromonas     | 24                |
| <i>nifH</i> | Bacteria | Proteobacte  | Deltaproteobact   | Desulfobact   | Desulfobact  | Desulfatibacillum | 3                 |
| <i>nifH</i> | Bacteria | Proteobacte  | Deltaproteobact   | Desulfovibri  | Desulfovibr  | Desulfomicrobium  | 2                 |
| <i>nifH</i> | Bacteria | Proteobacte  | Deltaproteobact   | Desulfovibri  | Desulfovibr  | Desulfovibrio     | 3                 |
| <i>nifH</i> | Bacteria | Proteobacte  | Deltaproteobact   | Desulfurom    | Desulfurom   | Desulfuromonas    | 2                 |
| <i>nifH</i> | Bacteria | Proteobacte  | Deltaproteobact   | Desulfurom    | Geobactera   | Geobacter         | 47                |
| <i>nifH</i> | Bacteria | Proteobacte  | Deltaproteobact   | Desulfurom    | Pelobactera  | Pelobacter        | 87                |
| <i>nifH</i> | Bacteria | Proteobacte  | Deltaproteobact   | Myxococcal    | Myxococcae   | Anaeromyxobacter  | 17                |
| <i>nifH</i> | Bacteria | Proteobacte  | Deltaproteobact   | Syntrophoba   | Syntrophoba  | Syntrophobacter   | 20                |
| <i>nifH</i> | Bacteria | Proteobacte  | Gammaproteob      | Pseudomon     | Pseudomon    | Pseudomonas       | 11                |
| <i>nifH</i> | Bacteria | Proteobacte  | unclassified (de  | unclassified  | unclassified | Magnetococcus     | 13                |
| <i>nifH</i> | Bacteria | Verrucomicr  | unclassified (de  | Methylacidip  | Methylacidip | Methylacidiphilum | 1                 |
| <i>prX</i>  | Archaea  | Crenarchaeo  | Thermoprotei      | Desulfuroco   | Pyrodictiace | Hyperthermus      | 1                 |
| <i>prX</i>  | Archaea  | Euryarchaeo  | Archaeoglobi      | Archaeoglob   | Archaeoglob  | Archaeoglobus     | 1                 |
| <i>prX</i>  | Archaea  | Euryarchaeo  | Methanomicrob     | Methanosar    | Methanosar   | Methanosarcina    | 9                 |
| <i>prX</i>  | Bacteria | Bacteroidete | Flavobacteria     | Flavobacter   | Flavobacter  | Zunongwangia      | 236               |
| <i>prX</i>  | Bacteria | Chlorobi     | Chlorobia         | Chlorobiales  | Chlorobiace  | Chlorobaculum     | 7                 |
| <i>prX</i>  | Bacteria | Chlorobi     | Chlorobia         | Chlorobiales  | Chlorobiace  | Chlorobium        | 4                 |
| <i>prX</i>  | Bacteria | Chlorobi     | Chlorobia         | Chlorobiales  | Chlorobiace  | Pelodictyon       | 3                 |
| <i>prX</i>  | Bacteria | Chloroflexi  | Dehalococcoide    | unclassified  | unclassified | Dehalococcoides   | 4                 |
| <i>prX</i>  | Bacteria | Firmicutes   | Clostridia        | Thermoana     | Thermoana    | Caldanaerobacter  | 1                 |
| <i>prX</i>  | Bacteria | Proteobacte  | Alphaproteobac    | Rhodobacte    | Hyphomona    | Oceanicaulis      | 1                 |
| <i>prX</i>  | Bacteria | Proteobacte  | Deltaproteobact   | Desulfovibri  | Desulfovibr  | Desulfovibrio     | 1                 |
| <i>prX</i>  | Bacteria | Proteobacte  | Gammaproteob      | Thiotrichale  | Francisellac | Francisella       | 1                 |
| <i>psbA</i> | Bacteria | Cyanobacteri | unclassified (de  | Chroococca    | unclassified | Crocospaera       | 1                 |
| <i>psbA</i> | Bacteria | Cyanobacteri | unclassified (de  | Chroococca    | unclassified | Cyanothece        | 1994              |
| <i>psbA</i> | Bacteria | Cyanobacteri | unclassified (de  | Chroococca    | unclassified | Synechococcus     | 5203              |
| <i>psbA</i> | Bacteria | Cyanobacteri | unclassified (de  | Nostocales    | Nostocacea   | Anabaena          | 588               |
| <i>psbA</i> | Bacteria | Cyanobacteri | unclassified (de  | Nostocales    | Nostocacea   | Nostoc            | 378               |
| <i>psbA</i> | Bacteria | Cyanobacteri | unclassified (de  | Oscillatoria  | unclassified | Trichodesmium     | 548               |
| <i>psbA</i> | Bacteria | Cyanobacteri | unclassified (de  | Prochlorales  | Prochloroco  | Prochlorococcus   | 181               |

|             |           |              |                   |              |              |                          |      |
|-------------|-----------|--------------|-------------------|--------------|--------------|--------------------------|------|
| <i>psbA</i> | Eukaryota | Chlorophyta  | Chlorophyceae     | Chlamydom    | Chlamydom    | Chlamydomonas            | 316  |
| <i>psbA</i> | Eukaryota | Chlorophyta  | Prasinophyceae    | Pseudoscou   | Pycnococca   | Nephroselmis             | 3    |
| <i>psbA</i> | Eukaryota | Streptophyta | Coleochaetophy    | Coleochaeta  | Chaetospha   | Chaetosphaeridium        | 4    |
| <i>psbA</i> | Eukaryota | Streptophyta | Coniferopsida     | Coniferales  | Pinaceae     | Pinus                    | 9    |
| <i>psbA</i> | Eukaryota | Streptophyta | Liliopsida        | Poales       | Poaceae      | Oryza                    | 9    |
| <i>psbA</i> | Eukaryota | Streptophyta | Mesostigmatoph    | Mesostigma   | Mesostigma   | Mesostigma               | 10   |
| <i>psbA</i> | Eukaryota | Streptophyta | Polypodiopsida    | Polypodiales | Pteridaceae  | Adiantum                 | 1    |
| <i>psbA</i> | Eukaryota | unclassified | Bangiophyceae     | Bangiales    | Bangiaceae   | Porphyra                 | 1777 |
| <i>psbA</i> | Eukaryota | unclassified | Bangiophyceae     | Cyanidiales  | Cyanidiaceae | Cyanidium                | 109  |
| <i>psbA</i> | Eukaryota | unclassified | Cryptophyta       | Pyrenomonas  | Geminigera   | Guillardia               | 611  |
| <i>psbA</i> | Eukaryota | unclassified | Glaucocystophy    | unclassified | Cyanophora   | Cyanophora               | 170  |
| <i>psbA</i> | Viruses   | unclassified | unclassified (der | Caudovirale  | Myoviridae   | T4-like viruses          | 212  |
| <i>psbA</i> | Viruses   | unclassified | unclassified (der | Caudovirale  | Podoviridae  | unclassified (derived fr | 2    |
| <i>cikA</i> | Bacteria  | Cyanobacte   | unclassified (der | Nostocales   | Nostocacea   | Anabaena                 | 1    |
| <i>cikA</i> | Bacteria  | Cyanobacte   | unclassified (der | Chroococca   | unclassified | Cyanothece               | 20   |
| <i>cikA</i> | Bacteria  | Proteobacte  | Alphaproteobac    | Rhizobiales  | Methylobact  | Methylobacterium         | 1    |
| <i>cikA</i> | Bacteria  | Cyanobacte   | unclassified (der | Nostocales   | Nostocacea   | Nostoc                   | 9    |
| <i>cikA</i> | Bacteria  | Cyanobacte   | unclassified (der | Prochlorales | Prochloroco  | Prochlorococcus          | 1    |
| <i>cikA</i> | Bacteria  | Proteobacte  | Alphaproteobac    | Rhizobiales  | Bradyrhizob  | Rhodopseudomonas         | 1    |
| <i>cikA</i> | Bacteria  | Cyanobacte   | unclassified (der | Chroococca   | unclassified | Synechococcus            | 3    |
