# Supplementary material for: Daily rhythmicity in coastal microbial mats
Source: PubMed Central journal article supplement (PMC5953948; doi:10.1038/s41522-018-0054-5), 2018-05-15
Supplement: 41522_2018_54_MOESM3_ESM.pdf [file 41522_2018_54_MOESM3_ESM.pdf]

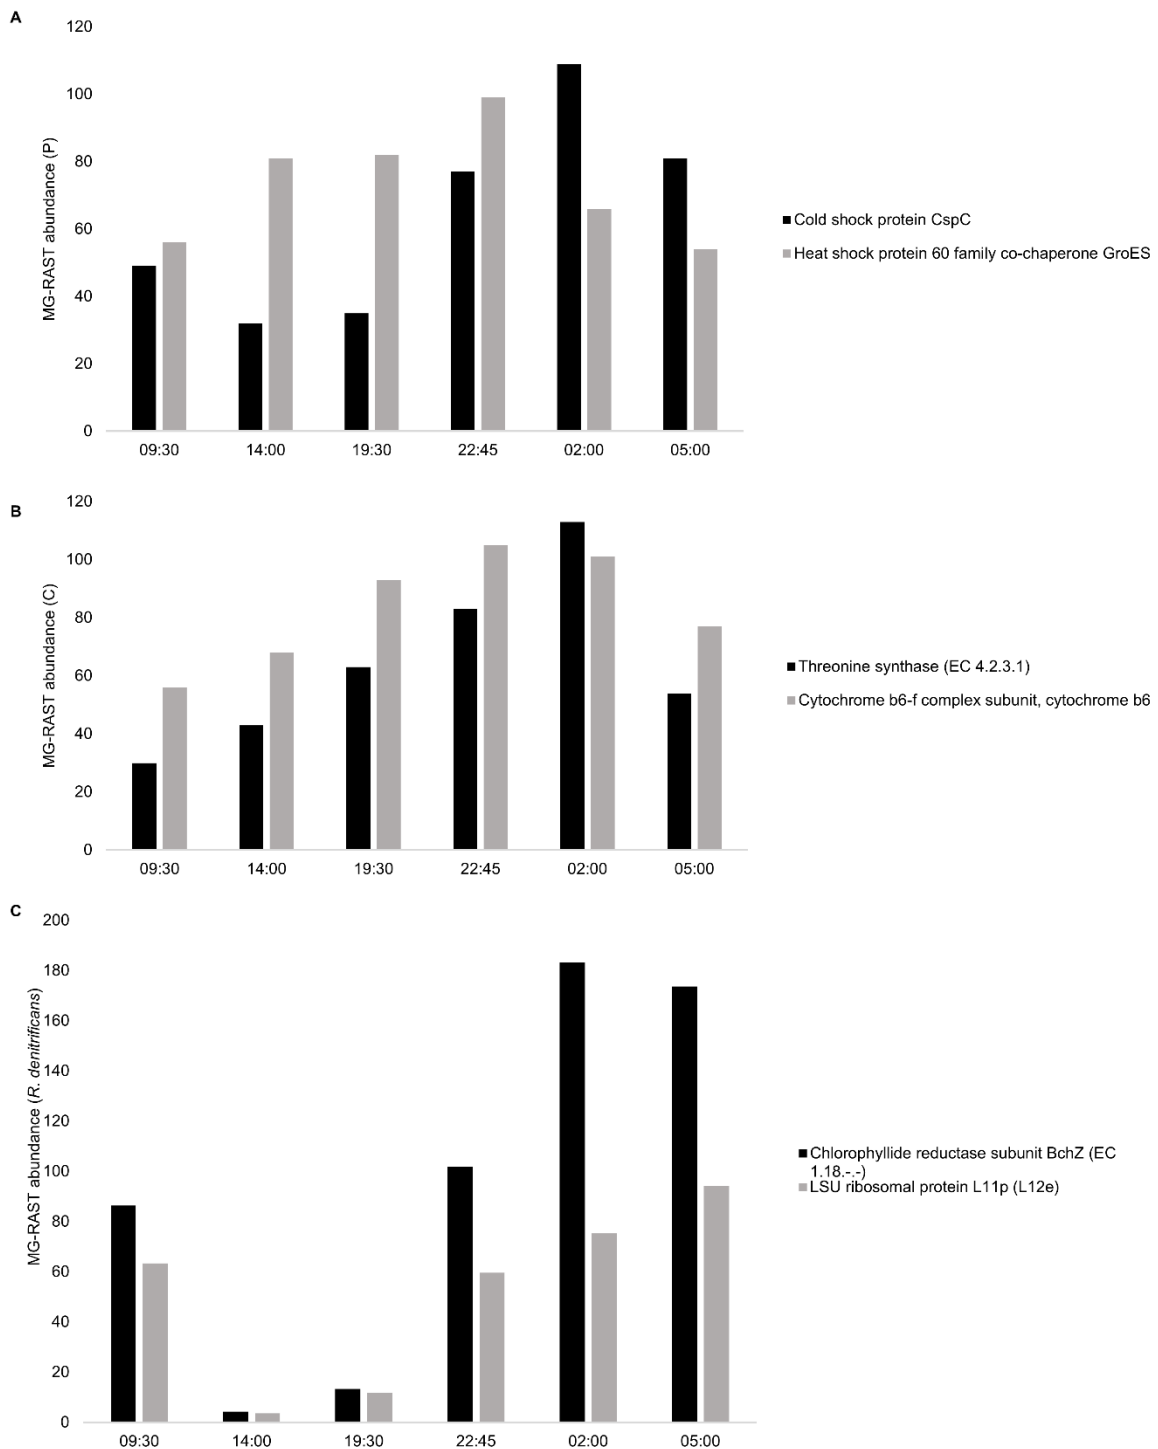

Fig. S1. Bar charts show examples of rhythmic gene expression profiles. The profiles were selected from (A) the cyanobacterial data set C displaying the expression of *CspC* (cold shock protein) (black) and *GroEs* (heat shock protein) (grey), from (B) the proteobacterial data set P showing the expression of genes encoding for threonine synthase (black) and cytochrome b6 subunit (grey) and from (C) *R. denitrificans* demonstrating expression profiles of *BchZ* (chlorophyllide reductase subunit) (black) and *L11p* (LSU ribosomal protein) (grey) coding genes. The MG-RAST abundance at each sampling time point is depicted.
